# Supplementary material
Source: publisher figshare collection journal article supplement (https://geolsoc.figshare.com/ndownloader/files/27181718)
Supplement: Supplementary file 1 [file 27181718]

10_MEAN_PlanCurv	11_STD_Plan_Curv	12_SUM_PlanCurv	13_MIN_Curv	15_MEAN_Curv	16_STD_Curv	17_SUM_Curv	20_RANGE_Elev	23_STD_Elev	27_MEAN_Rough125	29_SUM_Rough125	30_MIN_Slope	Predictor		Resulting variables from TreeBagger
-0.045489652	0.173147077	-31.933736	-0.958007813	-0.104016339	0.352367822	-73.01947021	93.09661865	22.18927556	0.477906777	335.4905576	8.80	1
-0.148241172	0.122483209	-104.6582672	-0.967285156	-0.279270594	0.232701476	-197.1650391	126.440918	33.59482955	0.47412472	334.7320522	12.18	1
-0.081232693	0.287808071	-56.94411758	-1.31439209	-0.031342641	0.384537958	-21.97119141	110.7893677	27.70275111	0.560969754	393.2397973	15.37	1
0.031844422	0.34600854	22.41847299	-0.859863281	0.139316212	0.380510236	98.07861328	125.5095215	28.60626043	0.533020061	375.2461229	2.35	1
-0.000489764	0.10693449	-0.342834639	-0.372436523	0.066158622	0.219144144	46.31103516	104.5026855	25.07813543	0.524987389	367.4911724	13.99	1
-0.139133666	0.375352258	-98.92403633	-2.467712402	-0.252976387	0.795295688	-179.8662109	112.4547119	28.61448071	0.528960159	376.0906732	4.81	1
-0.058886379	0.212097143	-41.39712445	-1.088500977	-0.000817767	0.316990663	-0.574890137	86.81195068	22.80683524	0.566183511	398.0270085	9.62	1
0.095036203	0.274340079	67.28563149	-1.787536621	-0.154011699	0.702784771	-109.0402832	86.89080811	22.48351329	0.430109566	304.5175726	1.17	1
-0.239085456	0.125233023	-168.794332	-1.214477539	-0.392322227	0.307113763	-276.9794922	128.619812	32.9681581	0.484963498	342.3842292	11.90	1
-0.102997153	0.348069189	-72.71599002	-1.409057617	-0.009471861	0.575354704	-6.687133789	102.887207	25.15730206	0.541488063	382.2905727	1.12	1
-0.158077412	0.463895186	-111.602653	-1.929931641	-0.217369706	0.629545021	-153.4630127	94.55529785	26.34357742	0.511521242	361.133997	8.44	1
-0.333541951	0.397807861	-234.8135338	-2.277404785	-0.314657298	0.633013713	-221.5187378	111.3546143	29.37240129	0.577499801	406.5598601	10.00	1
-0.105605665	0.210882986	-74.6632055	-0.926757813	-0.059877129	0.323146744	-42.33312988	93.59655762	25.21831756	0.569896862	402.9170812	10.97	1
-0.226406854	0.291720594	-159.8432386	-1.559753418	-0.219151829	0.450110573	-154.7211914	98.29711914	25.78373211	0.5576258	393.683815	10.44	1
0.007322864	0.320217658	5.13332749	-1.38104248	-0.044630717	0.454262876	-31.28613281	110.227417	28.51992267	0.492469407	345.2210543	8.72	1
-0.232041479	0.431694815	-163.3572009	-1.866943359	-0.260286071	0.583664989	-183.241394	152.8059082	39.97765932	0.527905166	371.6452367	12.26	1
-0.024188865	0.375144794	-16.95639421	-1.37310791	-0.080911024	0.490583939	-56.71862793	140.0348511	36.09318461	0.478176589	335.2017891	13.23	1
-0.03220661	0.258370692	-22.64124704	-1.370300293	0.053793852	0.357763776	37.81707764	135.0499268	34.69704251	0.538940725	378.8753294	15.07	1
-0.307067922	0.309599693	-217.0970206	-1.575866699	-0.401235017	0.467964942	-283.6731567	106.5293579	26.81883687	0.505169108	357.1545596	7.47	1
0.011166949	0.166511175	7.861532425	-0.807678223	-0.028084408	0.227492717	-19.77142334	140.1187744	35.04188922	0.499973624	351.9814316	21.41	1
-0.232887	0.184802039	-163.7195611	-0.94354248	-0.291915438	0.28292833	-205.2165527	111.1434937	29.02236855	0.526121223	369.8632195	14.75	1
-0.298717476	0.269668921	-209.1022333	-1.363769531	-0.347573678	0.431578364	-243.3015747	118.3310547	28.80833545	0.52645087	368.5156093	15.68	1
-0.235842515	0.21154736	-165.3256027	-0.868530273	-0.299310311	0.329901932	-209.8165283	120.7334595	28.93153453	0.50073297	351.0138119	15.58	1
-0.164641387	0.396940904	-116.4014605	-1.44342041	-0.272545368	0.514104589	-192.6895752	125.4196777	29.50537222	0.494437009	349.5669651	12.74	1
-0.240592672	0.276122581	-169.8584267	-1.32421875	-0.26481676	0.44779593	-186.9606323	81.90222168	21.83723614	0.547308368	386.3997075	8.16	1
-0.103328543	0.116511637	-72.43330888	-0.8203125	-0.098308569	0.321098206	-68.91430664	132.1436157	33.42939579	0.540680252	379.016857	17.29	1
-0.082234746	0.181698514	-58.13996556	-1.117126465	-0.28465571	0.369921114	-201.2515869	106.0929565	28.59695834	0.417338254	295.0581459	4.78	1
-0.14528005	0.217620581	-101.841315	-0.993286133	-0.173020127	0.297518578	-121.2871094	126.5096436	33.90846656	0.519128972	363.9094092	19.78	1
0.036054725	0.274934998	25.27436251	-0.794250488	0.019147016	0.386065094	13.42205811	113.1640625	31.59557592	0.473116288	331.6545179	14.39	1
-0.26347637	0.354817411	-185.2238881	-1.824279785	-0.414092887	0.562090802	-291.1072998	94.17669678	21.38918751	0.513828439	361.2213924	9.99	1
-0.230548777	0.214936156	-162.9979852	-1.334228516	-0.280356832	0.413222378	-198.2122803	109.7684326	27.44853256	0.544956711	385.2843949	9.60	1
0.075035867	0.155428769	53.05035787	-0.440185547	0.251775976	0.441631762	178.0056152	125.0792236	35.48015168	0.542445331	383.5088488	0.87	1
0.021199981	0.095435213	14.88238638	-0.567260742	0.134948209	0.241080324	94.73364258	91.91625977	23.29231699	0.572486472	401.8855034	4.24	1
-0.156537226	0.297552348	-110.0456701	-1.560058594	-0.10001535	0.476012558	-70.31079102	78.24060059	20.50053565	0.615043886	432.375852	4.13	1
-0.209837188	0.30903035	-147.7253804	-1.330078125	-0.381541946	0.405609416	-268.6055298	87.05090332	22.10882142	0.447625966	315.1286798	3.80	1
-0.261295515	0.279851634	-182.9068607	-1.846313477	-0.291110317	0.422026115	-203.7772217	97.25073242	23.86830915	0.557383745	390.1686212	11.23	1
-0.046893811	0.186486531	-33.10703085	-1.323974609	-0.028669579	0.406777401	-20.24072266	105.428833	27.65919646	0.544652217	384.5244652	4.69	1
-0.226668211	0.296404468	-159.3477524	-1.656738281	-0.155555779	0.456186734	-109.3557129	108.2592773	28.62152583	0.584753838	411.081948	8.32	1
0.030815939	0.113723594	21.75605322	-0.416015625	0.141648938	0.289656986	100.0041504	93.48144531	24.91640381	0.566161407	399.709953	2.42	1
-0.00796313	0.223899413	-5.57419123	-1.251342773	-0.0482387	0.374022923	-33.76708984	119.8843384	30.08407305	0.486954453	340.8681171	10.54	1
-0.134948976	0.31099409	-95.27397716	-1.219848633	-0.08569699	0.439409883	-60.5020752	102.6160889	26.05019279	0.563005977	397.4822198	8.12	1
0.065972428	0.266773851	46.57653403	-0.871765137	0.090701614	0.389086193	64.03533936	85.31030273	20.61553194	0.493901011	348.6941141	11.65	1
-0.280761518	0.28723407	-197.9368702	-1.330200195	-0.273050857	0.48923472	-192.5008545	97.0880127	25.62472287	0.554512595	390.9313797	10.52	1
-0.143432325	0.080043653	-100.2591952	-0.770629883	-0.194272981	0.21402674	-135.796814	94.6385498	22.70490632	0.527503859	368.7251977	13.76	1
-0.009254067	0.134994871	-6.533371614	-1.274353027	-0.259034241	0.447575447	-182.8781738	79.70129395	23.44972081	0.409893982	289.3851514	0.40	1
-0.272918204	0.224152045	-193.2260884	-1.269165039	-0.285210216	0.38067092	-201.928833	116.0246582	29.52635415	0.542515367	384.1008796	13.37	1
-0.200623518	0.359123021	-140.8377099	-1.340026855	-0.200454668	0.474869862	-140.7191772	109.0188599	27.2298091	0.543560601	381.5795422	14.62	1
-0.019818931	0.192657233	-13.99216558	-0.62677002	0.057378061	0.259527145	40.50891113	164.413208	41.15982129	0.523573717	369.6430444	20.33	1
-0.16391046	0.171297916	-115.2290532	-0.89465332	-0.227024561	0.263994087	-159.5982666	93.50213623	21.67352874	0.523816449	368.2429636	11.99	1
-0.109994918	0.229677597	-76.9964423	-1.539001465	-0.083032139	0.37203772	-58.12249756	100.5402222	23.45281101	0.559242045	391.4694317	11.81	1
-0.075516446	0.170170115	-53.4656437	-1.089538574	-0.007724309	0.274352426	-5.468811035	105.4671021	25.5677841	0.577025211	408.5338497	11.18	1
-0.101631971	0.173014564	-71.34564381	-1.210083008	-0.109250669	0.293074875	-76.69396973	96.32141113	22.71555362	0.528591034	371.0709059	9.77	1
-0.148088751	0.276500026	-104.8468357	-1.434204102	-0.164032845	0.36193963	-116.1352539	123.8105469	30.23190239	0.538520028	381.2721798	18.77	1
0.13119422	0.20362916	92.09834265	-0.633300781	0.18879052	0.277783311	132.5309448	140.3804321	33.68401765	0.499568712	350.6972361	15.93	1
-0.211405013	0.234023727	-148.4063191	-1.214233398	-0.255300842	0.33528056	-179.2211914	97.22680664	24.75567652	0.539595162	378.7958034	8.82	1
-0.231800488	0.312044209	-163.8829452	-1.754150391	-0.259549283	0.47342814	-183.5013428	99.28137207	25.63925383	0.562211459	397.4835016	8.84	1
-0.171503431	0.229005828	-120.9099189	-1.180297852	-0.161774158	0.365117467	-114.0507813	90.0177002	22.72728171	0.554904335	391.2075563	11.54	1
-0.165877275	0.266985734	-116.6117246	-1.218017578	-0.166027085	0.384375141	-116.717041	114.7915039	29.92952399	0.542046626	381.058778	15.46	1
-0.178880815	0.235215681	-126.6476169	-1.077026367	-0.187964833	0.378254946	-133.0791016	98.04174805	24.12342642	0.542992034	384.43836	11.63	1
-0.132561526	0.158822025	-93.19075305	-1.075195313	-0.17741279	0.351878411	-124.7211914	114.8330078	28.66360142	0.523439426	367.9779166	13.70	1
-0.270419696	0.313164653	-189.2937872	-1.689208984	-0.229713832	0.426260123	-160.7996826	129.494873	32.15737971	0.552703027	386.8921187	17.77	1
0.049145609	0.104554645	34.74594581	-0.545776367	0.038654246	0.278239462	27.32855225	126.0596313	32.59020827	0.486422821	343.9009344	17.46	1
-0.136069473	0.181702223	-95.79290864	-0.830322266	-0.163321408	0.244688641	-114.9782715	89.71472168	22.14866671	0.526816575	370.8788685	12.76	1
-0.195958712	0.283643858	-138.5428097	-1.39642334	-0.254157211	0.395820426	-179.6891479	112.9268188	27.10941522	0.526284342	372.0830296	12.35	1
-0.130600714	0.208848453	-91.94290278	-1.387573242	-0.147606763	0.402349981	-103.9151611	103.2624512	28.79241318	0.514595595	362.275299	10.54	1
-0.306876025	0.268449676	-216.3475979	-1.569946289	-0.404447688	0.403577805	-285.1356201	122.9750977	28.51721332	0.518489748	365.5352723	11.76	1
0.06952636	0.168257085	49.1551364	-0.758178711	0.106929105	0.255426335	75.59887695	126.223877	30.68998502	0.511521698	361.6458405	16.33	1
-0.033123295	0.133178995	-23.4512932	-1.387634277	-0.032324753	0.343010976	-22.88592529	127.9233398	29.6734607	0.517046052	366.0686049	13.65	1
-0.172197515	0.377174053	-121.7436434	-1.600830078	-0.197671375	0.482630547	-139.7536621	115.5270996	28.30997262	0.548072482	387.4872451	13.59	1
-0.173137811	0.222697252	-121.8890192	-1.080078125	-0.207165891	0.314032526	-145.8447876	89.36425781	21.28614285	0.538206505	378.8973795	11.13	1
0.009609855	0.093371067	6.79416732	-0.756774902	-0.081480207	0.317942415	-57.60650635	94.65631104	25.020648	0.424127727	299.8583029	4.29	1
-0.016377292	0.13293169	-11.56236825	-0.942016602	-0.059176005	0.221784198	-41.77825928	115.1486206	28.02470791	0.484083371	341.7628599	13.47	1
-0.085458233	0.194176561	-60.33351238	-1.201416016	-0.312535272	0.359904992	-220.6499023	94.52349854	22.88363895	0.429330817	303.1075571	4.57	1
0.06961048	0.145846749	49.21460934	-0.384033203	0.17886495	0.281624308	126.4575195	124.2819214	32.97327115	0.523178819	369.8874253	4.76	1
-0.172261421	0.158704379	-120.238472	-0.916870117	-0.1729286	0.271986173	-120.7041626	83.5223999	19.69715295	0.548449369	382.8176595	10.37	1
-0.19333856	0.390942525	-136.6903618	-1.634521484	-0.134797394	0.529791638	-95.30175781	159.6242676	37.80822064	0.540332825	382.0153076	20.24	1
-0.158415589	0.164357235	-111.5245747	-0.892089844	-0.20052355	0.252180968	-141.1685791	118.8588867	28.19044795	0.502190457	353.5420819	14.78	1
-0.17431156	0.13988307	-122.8896496	-0.960693359	-0.19839404	0.210421925	-139.8677979	96.13867188	24.72386919	0.526350993	371.0774503	13.84	1
-0.202049683	0.167956455	-142.4450264	-1.070068359	-0.273091201	0.310671447	-192.5292969	108.2227783	27.93041824	0.516749165	364.3081614	12.36	1
-0.305188803	0.292847124	-213.9373508	-1.464599609	-0.390000892	0.419848456	-273.390625	124.4393311	29.13027867	0.541820211	379.815968	14.32	1
-0.127496788	0.312457861	-90.26772618	-1.356445313	-0.065998832	0.392533001	-46.72717285	126.8173828	31.8598276	0.54783872	387.8698139	16.43	1
-0.258882716	0.210228704	-183.03008	-1.306274414	-0.265916449	0.361227759	-188.0029297	130.1793213	33.36271779	0.523237487	369.9289032	12.43	1
-0.00591435	0.276853762	-4.175530813	-0.987548828	0.017736332	0.40465746	12.52185059	141.1018066	34.50957668	0.507438551	358.2516167	16.90	1
0.105989634	0.260701263	74.8286819	-1.834228516	-0.036854341	0.887868199	-26.01916504	128.3334351	31.54668222	0.463394547	327.1565499	1.75	1
-0.233775182	0.27843548	-164.8115031	-1.006835938	-0.312073966	0.401258524	-220.012146	111.0684814	27.34208336	0.506237723	356.8975945	11.32	1
-0.280714546	0.225808319	-197.6230404	-1.752807617	-0.285877921	0.368647876	-201.2580566	108.4931641	26.47323436	0.570330869	401.512932	16.17	1
0.06154343	0.178320009	43.5112047	-1.643798828	0.139587834	0.481008409	98.68859863	87.59216309	20.31588226	0.505777757	357.5848745	2.05	1
-0.169646982	0.257708905	-119.770769	-1.367126465	-0.189701588	0.365674705	-133.9293213	118.828125	27.1179585	0.534810082	377.5759181	15.37	1
-0.01488091	0.21485692	-10.47616047	-1.036621094	0.00999312	0.329869016	7.03515625	92.10742188	20.71118945	0.522589248	367.9028308	6.87	1
0.155390205	0.192355545	109.7054844	-0.93371582	0.150325267	0.504418128	106.1296387	101.4415283	21.80825383	0.452400069	319.3944487	2.88	1
-0.028249952	0.248126748	-19.91621624	-0.880981445	-0.073317507	0.356677792	-51.68884277	105.3862305	25.33904412	0.48513176	342.017891	9.67	1
0.081743547	0.244514745	57.71094406	-1.023925781	0.114090701	0.366033425	80.54803467	95.777771	24.43844678	0.478978735	338.1589869	13.19	1
-0.190298081	0.206928305	-133.2086568	-1.166137695	-0.176145891	0.434797191	-123.302124	92.70581055	24.92864572	0.525400998	367.7806988	6.52	1
-0.001618804	0.233960283	-1.138018951	-0.955932617	-0.025279494	0.31125732	-17.77148438	79.62841797	21.31292697	0.507546513	356.8051984	8.59	1
-0.213141754	0.292710662	-149.6255113	-1.585388184	-0.274419627	0.405706976	-192.6425781	123.338501	28.88192476	0.5188255	364.2155011	16.03	1
-0.04571654	0.246394371	-32.2758772	-1.10144043	-0.074149934	0.340729969	-52.34985352	122.9807129	29.97079274	0.493886969	348.6842004	15.99	1
-0.207285975	0.316333469	-146.5511843	-1.279785156	-0.197262172	0.461731876	-139.4643555	105.6037598	26.1931688	0.537824616	380.2420038	10.66	1
-0.184595776	0.151346253	-130.5092133	-0.905639648	-0.234960661	0.256005236	-166.1171875	110.6156006	27.37474736	0.505242927	357.2067494	15.19	1
-0.153023846	0.168891752	-108.1878588	-0.842041016	-0.148730158	0.270784874	-105.1522217	118.4807129	31.05142431	0.53754194	380.0421518	16.41	1
-0.316514323	0.314929278	-223.4591118	-2.20324707	-0.351276344	0.460280901	-248.0010986	113.861084	25.44801517	0.558006938	393.9528986	11.11	1
-0.273885366	0.204664832	-192.5414121	-1.753173828	-0.352208014	0.410232259	-247.6022339	109.9690552	25.99887286	0.507261782	356.6050329	10.60	1
-0.190177004	0.18260795	-133.6944341	-1.159790039	-0.194258493	0.266080626	-136.5637207	118.7666016	27.65275425	0.527316089	370.7032103	15.41	1
-0.137280875	0.12739787	-97.05757831	-0.905273438	-0.151100256	0.240089227	-106.8278809	91.91955566	22.41949916	0.539470354	381.4055404	10.91	1
-0.298181431	0.278976759	-209.025183	-1.947875977	-0.311778897	0.432259135	-218.5570068	112.0562744	25.72226272	0.55320982	387.8000836	12.52	1
-0.051376291	0.081852864	-36.37441372	-0.810241699	-0.189235709	0.279254845	-133.9788818	104.1532593	30.65613007	0.392574618	277.9428295	0.16	1
-0.119122933	0.138222676	-83.74342224	-0.990478516	-0.129342265	0.306754417	-90.9276123	99.52453613	26.98158572	0.517096664	363.5189545	10.48	1
-0.061540017	0.153945436	-43.26263195	-0.846069336	-0.075770762	0.267569119	-53.2668457	110.7807617	26.70212415	0.50855118	357.5114794	12.36	1
-0.024483941	0.283306702	-17.28566264	-1.388549805	0.020607232	0.391519124	14.54870605	136.1364746	36.40484224	0.523654423	369.7000228	17.48	1
-0.253472722	0.373044193	-177.9378508	-2.075561523	-0.237845136	0.543284279	-166.9672852	110.3017578	25.44249844	0.573165492	402.3621753	13.36	1
0.002953628	0.096408867	2.088214921	-0.643310547	-0.053946963	0.248384944	-38.14050293	107.3995972	25.58447254	0.457008424	323.1049561	14.35	1
-0.032882576	0.145003819	-23.18221627	-0.88684082	-0.07574965	0.285734455	-53.40350342	103.4847412	26.93788264	0.492629494	347.3037933	13.93	1
-0.217010741	0.188028116	-153.4265937	-0.975219727	-0.229964325	0.25748168	-162.5847778	86.88616943	21.37903318	0.545793776	385.8761996	12.84	1
-0.10025673	0.459826565	-70.27996741	-1.264343262	-0.101978863	0.573993414	-71.48718262	104.40448	28.83101043	0.521589262	365.6340727	13.78	1
-0.194112813	0.215222296	-136.2671948	-1.366210938	-0.214752632	0.301049534	-150.7563477	104.6640625	23.74136953	0.534084971	374.9276498	13.49	1
-0.128684801	0.185577121	-90.98015427	-0.861083984	-0.161713035	0.268150865	-114.3311157	91.64550781	23.5565137	0.513976402	363.3813161	11.60	1
-0.28698243	0.412374591	-201.7486486	-1.874084473	-0.265591053	0.549352068	-186.7105103	141.722229	35.01126655	0.552592202	388.4723184	20.81	1
-0.168484965	0.238513498	-119.2873554	-1.340087891	-0.334943179	0.391614482	-237.1397705	94.34191895	20.94677465	0.489100922	346.2834525	8.98	1
-0.206448435	0.291293956	-145.3396986	-1.253295898	-0.179399317	0.380119454	-126.2971191	100.4432373	24.4133464	0.561488745	395.2880764	11.86	1
-0.291329279	0.237507954	-203.930495	-1.67388916	-0.374817418	0.394347598	-262.3721924	121.6223145	28.00271833	0.529301162	370.5108135	12.77	1
-0.109115778	0.440732993	-76.5992764	-1.968139648	-0.082155755	0.540593031	-57.67333984	124.1999512	30.28876792	0.542673196	380.9565836	16.42	1
-0.192339485	0.333804413	-135.9840161	-1.880859375	-0.269586674	0.447550967	-190.5977783	131.5545654	33.9076753	0.497259579	351.5625226	14.62	1
-0.206283727	0.285816639	-145.4300274	-1.20703125	-0.220501925	0.357832143	-155.4538574	117.4116211	28.05253987	0.526726547	371.3422156	17.38	1
-0.123769651	0.227321301	-87.01006483	-0.768310547	-0.11001435	0.260854767	-77.34008789	112.0950928	28.28547743	0.539479019	379.2537503	18.71	1
-0.050163481	0.197899059	-35.51574439	-0.883911133	0.067595918	0.374921174	47.85791016	126.7672119	34.98746341	0.556754194	394.1819693	2.68	1
-0.158983344	0.217271955	-111.7652907	-1.235107422	-0.074240455	0.37743338	-52.19104004	109.6243896	27.6771152	0.577658758	406.0941066	8.05	1
-0.256377508	0.294978559	-180.7461428	-1.752807617	-0.359662688	0.429828361	-253.5621948	110.4879761	24.92838625	0.51325359	361.8437806	11.33	1
-0.046745208	0.217914756	-32.76839096	-1.39440918	-0.056644369	0.362327519	-39.70770264	119.3233643	28.40460133	0.507107071	355.4820569	11.66	1
-0.198149275	0.27071932	-140.0915373	-1.305541992	-0.143488559	0.367029549	-101.4464111	97.39050293	22.84582327	0.578057647	408.6867565	10.13	1
-0.028080418	0.233108622	-19.74053416	-1.658813477	-0.048833682	0.345834994	-34.33007813	125.1273193	31.47614164	0.511461359	359.5573356	15.89	1
-0.29154748	0.407693179	-206.1240687	-1.817749023	-0.367485597	0.546311901	-259.8123169	129.7991943	31.21412996	0.537103831	379.7324082	13.84	1
-0.036432852	0.302634085	-25.57586227	-0.942871094	-0.008618825	0.399011291	-6.050415039	127.5290527	31.7665427	0.51651797	362.5956146	11.92	1
-0.112706975	0.098572402	-79.45841737	-0.917358398	-0.145734811	0.305871871	-102.743042	134.3198242	33.58231723	0.4990169	351.8069144	18.73	1
0.025907625	0.120560614	18.23896835	-0.976379395	-0.06993944	0.277435839	-49.23736572	126.9748535	30.87312737	0.452919798	318.8555376	10.89	1
-0.009257903	0.064484833	-6.526821804	-0.973327637	-0.075497112	0.288835063	-53.22546387	112.8817139	31.71798736	0.466035283	328.5548742	4.97	1
-0.002794326	0.112693738	-1.975588552	-0.671264648	-0.071974694	0.250460072	-50.8861084	79.8873291	20.33552382	0.454465587	321.3071701	9.27	1
-0.216058047	0.21736134	-151.8888071	-1.736816406	-0.21530668	0.319206828	-151.3605957	112.2387695	26.99207289	0.539284496	379.1170006	14.13	1
-0.088348657	0.242635125	-62.55084908	-1.45703125	-0.097721596	0.383194529	-69.18688965	101.3493652	23.24596494	0.531115357	376.0296725	9.12	1
-0.081489296	0.069977823	-57.28697519	-0.74987793	-0.15906682	0.219618447	-111.8239746	112.680542	27.29287893	0.480268859	337.6290081	13.75	1
-0.09834713	0.17070318	-69.43307346	-0.866943359	-0.079086001	0.289905705	-55.8347168	115.012207	30.01562995	0.52660009	371.7796635	14.95	1
-0.127572406	0.427251729	-90.19369117	-1.378173828	-0.122666247	0.559281417	-86.72503662	111.9733887	27.32383063	0.539885021	381.69871	12.72	1
-0.196482997	0.313754523	-138.9134788	-1.672302246	-0.226111859	0.479452209	-159.861084	133.9577026	28.98921911	0.534361807	377.7937974	11.79	1
-0.047310519	0.140244209	-33.21198453	-0.834899902	-0.05199891	0.303504559	-36.50323486	88.94049072	23.37820019	0.504849224	354.4041555	6.20	1
-0.15407899	0.200061485	-108.7797666	-0.632080078	-0.061962268	0.31725659	-43.74536133	107.5941162	25.52938058	0.561560185	396.4614909	0.26	1
0.005631693	0.195670149	3.93092177	-1.072937012	0.010506879	0.428781144	7.33380127	129.7623901	33.64673427	0.480416698	335.3308555	10.35	1
-0.153956071	0.252433215	-108.2311178	-1.229858398	-0.134350968	0.45107409	-94.44873047	95.9397583	21.87385306	0.539183876	379.0462651	4.64	1
-0.154509315	0.17765546	-109.2380854	-1.361206055	-0.126524066	0.292075083	-89.45251465	106.5496826	26.31924299	0.530296123	374.9193592	14.47	1
-0.222679134	0.13957644	-157.6568267	-0.815185547	-0.264085673	0.222097861	-186.9726563	130.7845459	33.80077117	0.513746316	363.7323918	20.33	1
-0.218734794	0.242751133	-153.9892947	-1.361572266	-0.210100174	0.328949957	-147.9105225	96.87365723	23.26095057	0.544517765	383.3405064	12.87	1
-0.077577559	0.262095196	-54.69217908	-0.963378906	-0.113610407	0.303853895	-80.09533691	156.1724854	38.56655417	0.489344734	344.9880373	21.56	1
-0.171911036	0.176723452	-121.7130135	-1.011108398	-0.239138673	0.329337435	-169.3101807	172.4348145	45.05002407	0.513584364	363.6177296	19.24	1
0.084396229	0.341394744	59.58373796	-0.864746094	0.100019504	0.472414707	70.61376953	113.9520264	28.16610955	0.484664151	342.1728906	15.29	1
-0.187543124	0.308458717	-131.6552727	-1.506347656	-0.259202919	0.480277802	-181.9604492	105.6270752	22.24304792	0.541577682	380.1875331	8.56	1
-0.150847177	0.148305554	-106.3472598	-1.950805664	-0.292728072	0.37815618	-206.373291	164.3704834	41.36793409	0.479553194	338.0850018	17.25	1
-0.046074347	0.104021362	-32.7588608	-0.547363281	-0.008452897	0.245194597	-6.010009766	137.2462158	33.04228685	0.517062392	367.6313607	16.73	1
-0.148424912	0.151184511	-104.6395633	-0.867797852	-0.222046245	0.251269427	-156.5426025	96.81445313	22.54478389	0.503131124	354.7074421	13.77	1
-0.057818011	0.119422773	-40.41478962	-1.624511719	-0.124101674	0.259862592	-86.74707031	143.4790039	35.64955845	0.471436819	329.5343365	17.87	1
-0.040278164	0.297376314	-28.47666175	-2.572509766	-0.141101368	0.491123784	-99.75866699	173.9781494	39.03596924	0.473064609	334.4566788	16.47	1
-0.114061069	0.133583918	-80.75523655	-0.730224609	-0.133956823	0.267525809	-94.84143066	108.6184082	26.25378	0.518053644	366.7819797	12.60	1
-0.104365317	0.285901843	-73.68191387	-1.105834961	-0.12238033	0.391581874	-86.4005127	124.2286377	31.5911078	0.511609181	361.196082	14.33	1
-0.151708135	0.178838011	-106.9542353	-1.237670898	-0.26854326	0.310641757	-189.322998	108.2255859	27.6196429	0.47200877	332.7661827	12.98	1
0.003469157	0.146667463	2.445755836	-1.118408203	-0.22569026	0.345243094	-159.1116333	116.0200195	33.06801769	0.34725372	244.8138725	0.24	1
-0.009427973	0.213033148	-6.665576679	-1.051757813	-0.125461174	0.319405023	-88.7010498	131.9123535	31.3737582	0.463114888	327.4222256	13.65	1
-0.114098234	0.163445103	-80.55335317	-1.020629883	-0.226261301	0.29578512	-159.7404785	134.1826172	36.19674269	0.479351693	338.4222952	13.12	1
-0.226080053	0.166480285	-159.1603576	-0.966308594	-0.26053342	0.307147806	-183.4155273	88.88464355	21.96623267	0.527826102	371.5895758	10.26	1
-0.268306198	0.304625563	-189.424176	-1.614135742	-0.249946746	0.443594829	-176.4624023	101.7165527	26.42949697	0.561410756	396.3559935	9.47	1
-0.127801537	0.312252193	-90.35568684	-1.057006836	-0.229685394	0.501572614	-162.3875732	127.3173828	30.65165429	0.484759378	342.7248801	13.73	1
-0.015322325	0.164412575	-10.75627186	-0.614868164	0.004872727	0.284999663	3.420654297	139.8929443	34.49104191	0.515843966	362.1224644	17.46	1
-0.256239109	0.299991182	-179.3673764	-1.184387207	-0.268340628	0.454197494	-187.8384399	135.1047363	33.22203177	0.514761547	360.3330831	8.80	1
-0.169665055	0.34109064	-119.783529	-1.327880859	-0.302298657	0.441032671	-213.4228516	118.4476318	27.41907	0.47873089	337.9840087	13.44	1
0.02565437	0.159769092	18.13763957	-0.766113281	0.024679699	0.30983974	17.44854736	136.1937866	34.02128194	0.507377461	358.7158646	18.82	1
0.069238144	0.144307257	49.02060627	-0.661437988	-0.059328155	0.247872172	-42.0043335	119.9022217	31.73457567	0.433050878	306.6000217	7.96	1
-0.00223417	0.140720143	-1.579558408	-0.702819824	-0.151380569	0.22241049	-107.026062	107.407959	28.14400849	0.410344899	290.1138436	2.10	1
-0.224238245	0.283440269	-157.639486	-1.688720703	-0.259133134	0.430525545	-182.1705933	94.29333496	23.06208536	0.550839063	387.2398612	10.70	1
-0.172755121	0.187980473	-121.4468503	-0.991333008	-0.129389148	0.282554721	-90.96057129	106.3572998	25.04599593	0.559837307	393.565627	13.53	1
-0.15315362	0.184693443	-108.1264558	-0.981811523	-0.205495861	0.241950521	-145.0800781	100.5583496	25.18652218	0.514499482	363.2366346	14.14	1
0.178788623	0.171251192	126.224768	-0.806396484	0.108936861	0.370302325	76.90942383	117.8435669	31.98900815	0.437959936	309.1997146	4.40	1
-0.034481694	0.157607982	-24.37855785	-1.180969238	-0.291129149	0.362448817	-205.8283081	111.8774414	31.92035173	0.418014336	295.5361359	1.80	1
-0.26060977	0.334854281	-184.2511073	-1.766479492	-0.302344941	0.485332551	-213.7578735	107.2351685	24.82492775	0.56621542	400.314302	12.11	1
-0.095705446	0.156275509	-67.47233941	-0.970458984	-0.081549202	0.282593107	-57.4921875	114.1606445	28.35838718	0.525546466	370.5102587	16.88	1
-0.194639284	0.213362917	-136.8314163	-1.237426758	-0.233858762	0.320091696	-164.40271	75.5189209	19.3756131	0.542377302	381.291243	9.23	1
-0.18534302	0.21881177	-129.5547709	-1.098999023	-0.166917793	0.313653789	-116.6755371	118.2924805	28.78691056	0.527133437	368.4662728	15.20	1
-0.038630678	0.080157417	-27.19599746	-0.658203125	-0.063405297	0.26074587	-44.6373291	108.4294434	25.3480536	0.503045958	354.1443546	13.40	1
-0.095818241	0.27930588	-67.74349644	-1.440429688	-0.125099452	0.412978791	-88.4453125	78.22680664	20.31783804	0.512101883	362.056031	9.70	1
-0.094485758	0.14012906	-66.80143093	-1.182983398	-0.087507839	0.308501978	-61.86804199	115.3514404	28.66406231	0.512375159	362.2492373	13.94	1
0.003514348	0.307399688	2.481129442	-0.879516602	0.008843527	0.395141571	6.243530273	88.31213379	22.70267657	0.504195122	355.9617562	11.53	1
-0.154490506	0.240377896	-108.6068257	-1.487060547	-0.151158817	0.341690159	-106.2646484	114.3253174	27.1821993	0.544961591	383.1079984	14.56	1
-0.155878895	0.339282452	-110.2063786	-1.349121094	-0.18750259	0.456972431	-132.5643311	97.6505127	24.07893939	0.542055033	383.2329086	12.25	1
-0.139230142	0.173504101	-98.01802018	-0.849487305	-0.090681249	0.363906067	-63.83959961	123.2008057	32.11502779	0.548506306	386.1484397	9.92	1
-0.206427118	0.357523698	-145.1182638	-1.546508789	-0.18528537	0.496375019	-130.2556152	108.0484619	27.81861279	0.559810526	393.5467997	12.47	1
-0.170520591	0.103473947	-120.387537	-0.809204102	-0.254903388	0.214865595	-179.961792	104.7744141	27.54487189	0.484975526	342.3927213	12.66	1
-0.153902654	0.355723783	-108.5013709	-1.587280273	-0.106901215	0.498486273	-75.36535645	131.5518799	32.64040291	0.544097256	383.5885656	15.32	1
-0.104840704	0.242609342	-74.33205945	-1.158569336	-0.103266319	0.371865175	-73.21582031	107.3006592	28.1027029	0.541843371	384.16695	14.18	1
-0.142818969	0.325963486	-100.6873733	-1.817443848	-0.355671508	0.613474924	-250.7484131	95.65527344	23.17415128	0.500064401	352.5454027	5.79	1
-0.099203213	0.247515811	-70.13667132	-1.063842773	-0.149732878	0.36643171	-105.861145	125.2484741	32.29807152	0.502810277	355.4868657	14.98	1
0.041908489	0.291925317	29.37785083	-0.841186523	0.074872549	0.327415575	52.48565674	119.8961182	30.70759419	0.522829552	366.503516	18.05	1
-0.214450609	0.307737277	-150.7587779	-1.606323242	-0.359709434	0.451737456	-252.8757324	99.47186279	23.35494231	0.505474956	355.3488939	9.10	1
-0.266112183	0.228012912	-188.4074252	-1.441345215	-0.409597537	0.345173222	-289.9950562	107.5206909	25.0320559	0.507797461	359.5206027	12.72	1
-0.089854296	0.303676447	-63.43713293	-1.321472168	-0.173283218	0.46137311	-122.3379517	105.5533447	27.34981797	0.491019499	346.6597666	4.99	1
-0.2243878	0.174100167	-158.4177869	-1.464599609	-0.177194223	0.259957481	-125.0991211	125.427002	30.52356224	0.552575386	390.1182224	14.84	1
-0.116857914	0.080340379	-81.80054009	-0.867553711	-0.189435861	0.314935949	-132.6051025	110.1622314	27.92005741	0.491716273	344.2013912	11.89	1
-0.112057319	0.276543956	-79.22452433	-1.248291016	-0.115913013	0.351004476	-81.95050049	126.807373	30.89496128	0.522474972	369.3898055	18.64	1
-0.240639327	0.187651378	-170.1320044	-1.070617676	-0.268984955	0.299579193	-190.1723633	112.7637329	27.17642603	0.540898757	382.4154215	16.45	1
-0.191851185	0.346716203	-135.0632346	-1.881652832	-0.229511694	0.469430662	-161.5762329	116.3853149	27.81898541	0.548281189	385.9899569	14.81	1
-0.096155318	0.289409714	-67.88565433	-1.602722168	-0.147816861	0.474220621	-104.3587036	103.8502197	26.68738417	0.514192419	363.0198478	9.46	1
-0.2594377	0.23207343	-182.6441405	-1.739746094	-0.250778198	0.421627907	-176.5478516	121.0866699	27.33715884	0.557098523	392.1973599	13.74	1
-0.027868858	0.163317105	-19.70328241	-1.09753418	-0.106385918	0.353454492	-75.21484375	113.317749	26.96997937	0.476633509	336.9798907	10.79	1
-0.136818762	0.136572093	-96.18359003	-0.807373047	-0.050342978	0.276268341	-35.39111328	145.1914063	39.7803846	0.552697625	388.5464306	12.20	1
-0.136610068	0.189254846	-96.58331798	-1.053344727	-0.251165452	0.310244144	-177.5739746	150.7979736	35.04832402	0.485744146	343.4211113	17.11	1
-0.046356381	0.192034796	-32.58853603	-0.9140625	-0.189543592	0.268018843	-133.2491455	162.564209	42.24720235	0.461654444	324.5430741	18.18	1
-0.107493926	0.123011237	-75.56823003	-0.725463867	-0.207627537	0.24872599	-145.9621582	146.387207	35.93310082	0.481927941	338.7953424	18.40	1
-0.117249939	0.203798851	-82.30945735	-1.125854492	-0.270007707	0.324361281	-189.5454102	155.072998	38.02718036	0.465192914	326.5654255	16.52	1
0.011595891	0.126505274	8.186699087	-0.754760742	0.084133591	0.316644015	59.39831543	117.7287598	27.05873836	0.516585555	364.709402	12.19	1
0.042431081	0.162954264	29.95634348	-1.476806641	0.020943877	0.400139803	14.78637695	121.3797607	34.39887894	0.488624992	344.9692441	7.46	1
-0.183249431	0.336091079	-128.2746018	-1.851196289	-0.237090716	0.611399835	-165.963501	129.5693359	32.15411156	0.504498477	353.1489337	9.95	1
-0.01232501	0.332169595	-8.726107426	-1.523803711	-0.043051165	0.607769529	-30.48022461	125.2346191	35.45888287	0.492668782	348.8094975	1.08	1
-0.148520809	0.166182198	-105.004212	-1.636230469	-0.300831149	0.404862241	-212.6876221	119.1173096	34.91740687	0.433299778	306.3429432	3.80	1
-0.070661967	0.140321901	-49.95801064	-2.329223633	-0.039209779	0.565578047	-27.72131348	126.6018066	31.0876456	0.518005528	366.229908	9.25	1
-0.157485886	0.219566225	-111.3425214	-1.695678711	-0.266919256	0.38483787	-188.7119141	136.8112793	32.66451824	0.48239325	341.052028	10.02	1
-0.00636201	0.170945153	-4.447044755	-0.879272461	0.021827709	0.309909785	15.25756836	123.2374268	34.57162129	0.502480126	351.2336082	13.45	1
-0.014931409	0.189623678	-10.54157462	-1.331665039	-0.000671387	0.42894062	-0.473999023	119.5179443	31.21103479	0.514408709	363.1725487	8.63	1
0.064957201	0.204504773	45.85978373	-0.868774414	0.199208549	0.424170379	140.6412354	109.4341431	30.32520139	0.537683564	379.6045965	3.56	1
-0.113356921	0.123117077	-80.37005731	-0.950073242	-0.029302815	0.339054857	-20.7756958	148.9067383	41.2208387	0.517437159	366.8629456	13.97	1
-0.017118277	0.232150553	-12.01703077	-1.566101074	-0.007685039	0.538300006	-5.394897461	134.1791382	40.13950432	0.505654803	354.9696721	4.01	1
-0.189100316	0.217986161	-133.504823	-2.711669922	-0.271078915	0.513293285	-191.3817139	128.8670654	33.81478756	0.496970449	350.8611373	4.64	1
0.030756786	0.197628938	21.65277754	-1.802429199	-0.059805697	0.607405331	-42.10321045	134.3643799	40.38382887	0.47350667	333.3486957	1.43	1
0.10087918	0.181597516	71.42245921	-0.781616211	0.087906142	0.355279921	62.23754883	116.3620605	33.57989124	0.451036805	319.3340583	13.06	1
-0.204844117	0.298847052	-144.4151024	-1.325683594	-0.251557825	0.431411638	-177.3482666	95.44714355	22.87569643	0.532022665	375.0759788	12.93	1
-0.2056504	0.209605115	-145.1891825	-1.129516602	-0.217319045	0.294884035	-153.4272461	105.3602295	24.52210422	0.512152714	361.5798162	13.97	1
-0.045328192	0.468908986	-31.82039089	-1.144165039	0.107018104	0.591482688	75.12670898	167.463623	44.55107014	0.571076117	400.8954339	12.36	1
-0.145490259	0.228389682	-102.2796518	-0.785400391	0.030928936	0.364324497	21.74304199	165.1685791	44.15506525	0.605848297	425.9113525	11.86	1
-0.033291923	0.125721569	-23.57068158	-0.858642578	-0.074641168	0.310968357	-52.84594727	136.9318848	34.66763274	0.483794036	342.5261777	16.11	1
-0.000558642	0.139999636	-0.39216636	-0.913452148	0.122732309	0.319640755	86.15808105	73.28198242	20.68319912	0.597864653	419.7009862	2.59	1
0.058820348	0.120506701	41.40952475	-1.289978027	-0.087143204	0.395378895	-61.34881592	153.1124268	39.35507209	0.429104239	302.089384	8.63	1
-0.191228367	0.315209416	-135.3896837	-1.390136719	-0.195136119	0.438172868	-138.1563721	133.9605713	32.00692283	0.539861173	382.2217101	14.98	1
-0.127366603	0.231307054	-90.04818842	-0.88293457	-0.216820184	0.313645028	-153.2918701	135.6466064	34.26873483	0.487595343	344.7299073	12.69	1
-0.282362594	0.294806591	-198.5009036	-1.597106934	-0.23888674	0.431420257	-167.9373779	109.1948853	25.64491258	0.572777328	402.6624613	9.12	1
-0.073370107	0.246187898	-51.28570495	-1.326293945	-0.052245395	0.375714046	-36.51953125	134.6848755	34.97975124	0.528864946	369.6765971	15.35	1
-0.060252129	0.135459209	-42.59825506	-0.689086914	-0.111058431	0.258284445	-78.51831055	93.57568359	22.50088807	0.504164402	356.4442323	10.29	1
-0.078934321	0.10388308	-55.88549903	-0.91027832	-0.048611743	0.275317459	-34.41711426	109.0579834	25.911741	0.54255949	384.1321191	12.04	1
-0.285044454	0.374939014	-201.2413843	-1.706970215	-0.354310292	0.556737416	-250.1430664	105.2250366	25.33895855	0.529090919	373.5381886	12.20	1
-0.144990389	0.248924525	-101.6382624	-1.083862305	-0.13024676	0.342001711	-91.30297852	131.2862549	31.26254204	0.534642213	374.7841915	15.89	1
-0.142834388	0.252745862	-100.6982435	-1.371459961	-0.192387661	0.344004759	-135.6333008	110.0939941	27.84505509	0.492876634	347.4780267	13.93	1
-0.076696147	0.135975602	-54.1474801	-0.893188477	-0.033678611	0.270905537	-23.77709961	113.2185059	28.92601512	0.528831088	373.3547482	11.71	1
0.021609196	0.146873831	15.16965591	-0.965026855	-0.00438175	0.315320101	-3.07598877	111.345459	29.19221129	0.477201261	334.9952855	9.95	1
0.070368626	0.138095167	49.46914442	-1.173217773	-0.090114371	0.391101502	-63.35040283	92.27209473	24.94383434	0.391343331	275.1143617	0.77	1
-0.163722003	0.128651542	-115.9151785	-0.748779297	-0.226608363	0.199715853	-160.4387207	106.1855469	26.11003525	0.495226531	350.6203837	15.70	1
-0.087005291	0.28099008	-60.90370355	-1.055358887	-0.08008885	0.46971157	-56.06219482	126.1270752	31.42995643	0.511586546	358.1105823	14.14	1
0.120687005	0.20025469	85.32571223	-1.585388184	-0.044788064	0.428087678	-31.66516113	107.3223877	27.71703324	0.350760786	247.987876	2.12	1
-0.11146847	0.307947696	-78.58527165	-1.30645752	-0.160680113	0.476955825	-113.27948	114.0421143	26.1485702	0.515066265	363.1217167	9.09	1
0.057819459	0.128015859	40.64707949	-0.550170898	0.169508086	0.206312681	119.1641846	121.3613892	30.84306553	0.517570627	363.8521507	9.19	1
0.071664474	0.106120008	50.52345416	-0.83190918	0.020493874	0.340962702	14.44818115	115.1963501	27.02194446	0.441829147	311.4895484	7.80	1
0.127890051	0.32456289	90.29037623	-0.5	0.175185249	0.361984126	123.6807861	108.1590576	24.14903494	0.492008528	347.3580208	5.42	1
-0.019964578	0.244867631	-14.03509823	-0.782836914	0.070275862	0.351969701	49.40393066	117.7769775	28.1955541	0.528092557	371.2490675	1.60	1
-0.12103209	0.30195011	-85.20659115	-1.051879883	-0.172285774	0.36834158	-121.2891846	103.769165	26.34827315	0.50918677	358.4674861	13.71	1
0.072493673	0.244376182	50.96305188	-0.681396484	0.391640111	0.347089798	275.322998	78.94946289	19.68512893	0.643267386	452.2169722	0.49	1
0.073831509	0.389789889	52.19887707	-2.026367188	-0.046229512	0.706252773	-32.68426514	93.42694092	24.79928502	0.427826779	302.4735328	5.70	1
0.101279985	0.277692939	71.50366951	-0.894165039	0.079672492	0.461876412	56.2487793	112.3721924	27.87102075	0.474713563	335.1477754	13.13	1
-0.064090732	0.14952468	-45.24805712	-0.829589844	-0.090636515	0.31157467	-63.98937988	141.0269775	37.54154002	0.505127729	356.6201765	18.48	1
-0.047949654	0.336365833	-33.90040504	-1.139770508	-0.033782398	0.44701529	-23.88415527	133.4205322	30.03631395	0.525037055	371.201198	9.48	1
-0.154053672	0.211709155	-108.7618927	-1.200439453	-0.119524126	0.370037359	-84.3840332	132.7519531	34.44656266	0.538638668	380.2788994	15.80	1
-0.094321506	0.119790408	-66.96826911	-0.960327148	-0.118065719	0.284954975	-83.82666016	109.7553711	24.38864422	0.517762212	367.6111705	12.96	1
-0.101395068	0.430880917	-71.68631335	-1.406860352	-0.091127992	0.576847699	-64.42749023	142.8632813	31.63328843	0.528039134	373.3236678	12.31	1
-0.172014343	0.227883932	-121.4421264	-1.373168945	-0.176221637	0.343513175	-124.4124756	141.0539551	33.21559857	0.533281026	376.4964045	17.62	1
-0.174107604	0.390703288	-123.2681834	-1.780029297	-0.234801212	0.593943582	-166.2392578	116.630127	32.41298835	0.509461076	360.6984418	6.39	1
-0.168901793	0.423515156	-118.5690587	-1.608093262	-0.189087001	0.576552651	-132.7390747	102.5252686	25.60451695	0.532959894	374.1378458	12.52	1
-0.152918152	0.19443769	-107.3485428	-1.091918945	-0.172084189	0.363416729	-120.8031006	105.5723877	29.19875911	0.510706944	358.5162747	11.96	1
0.093764781	0.185045998	66.38546474	-0.938354492	0.026690208	0.393804616	18.89666748	103.248291	26.86966534	0.425986871	301.5987047	2.90	1
0.08787632	0.17174573	62.12855818	-0.671203613	0.084813573	0.250535974	59.9631958	83.23120117	19.68593603	0.475280053	336.0229973	6.15	1
-0.104036594	0.274638716	-73.03368873	-1.187255859	-0.082266001	0.421866296	-57.75073242	125.5367432	30.54268067	0.538917411	378.3200227	11.46	1
-0.210953394	0.26072261	-149.3550031	-1.747436523	-0.105116763	0.323597846	-74.42266846	115.2193604	25.87433535	0.580097522	410.7090454	3.04	1
-0.022097063	0.197338619	-15.66681756	-0.598144531	0.12908221	0.339061579	91.51928711	96.96191406	26.74062232	0.567960779	402.6841926	0.32	1
-0.279634689	0.174775269	-196.5831861	-1.954467773	-0.424946553	0.377904714	-298.7374268	96.17480469	26.81566344	0.47312795	332.6089489	3.64	1
0.117839494	0.129012154	82.48764578	-0.863342285	-0.042711792	0.36608674	-29.89825439	131.8035889	35.83813701	0.387925969	271.548178	3.75	1
-0.013556503	0.156542521	-9.530221265	-0.704345703	-0.07378534	0.264804267	-51.87109375	117.4853516	31.57600884	0.461029449	324.1037028	15.02	1
0.166358877	0.242924011	117.449367	-1.261047363	0.043124969	0.528206452	30.44622803	145.6633911	39.9291285	0.420666299	296.9904068	0.52	1
-0.045076033	0.281351527	-31.68845116	-0.975952148	-0.138582102	0.343746279	-97.42321777	103.1481934	24.93933471	0.455763228	320.4015494	8.06	1
-0.061131804	0.261410396	-42.91452622	-1.013793945	-0.082150016	0.364404108	-57.66931152	112.0311279	27.34915623	0.505863698	355.116316	13.15	1
-0.049676511	0.18781991	-35.02194019	-0.832641602	-0.011731217	0.334995094	-8.270507813	116.0412598	32.2860732	0.535875175	377.7919984	17.62	1
-0.15785635	0.221462039	-111.7622959	-1.619628906	-0.188996913	0.429783973	-133.8098145	111.7044678	28.71304775	0.522264992	369.7636142	10.20	1
-0.073454944	0.197963694	-51.85919066	-1.453796387	-0.18989429	0.473279374	-134.0653687	123.5059204	31.89273518	0.465404435	328.5755313	0.50	1
-0.201756778	0.272420253	-142.2385288	-1.343505859	-0.206402718	0.502385166	-145.513916	95.51586914	27.25762718	0.538607984	379.7186288	4.27	1
-0.176439042	0.314454168	-123.6837686	-1.82043457	-0.197940407	0.541203457	-138.7562256	108.7456055	24.18023085	0.55759168	390.8717677	8.39	1
-0.180690336	0.22228501	-126.4832349	-1.424438477	-0.142378714	0.318750933	-99.6651001	111.1882935	26.24848146	0.560811154	392.5678077	10.34	1
-0.301110422	0.317311427	-212.2828476	-1.782226563	-0.291706491	0.502479495	-205.6530762	105.5040283	28.45611605	0.584119464	411.8042224	10.52	1
-0.048462615	0.252420731	-34.26306853	-1.513183594	-0.251413996	0.493476671	-177.7496948	112.2827148	29.40326394	0.4462579	315.5043351	0.51	1
-0.253240388	0.420104595	-178.0279926	-1.892822266	-0.33835477	0.60463049	-237.8634033	102.3205566	27.28299664	0.532832076	374.5809498	8.27	1
-0.003096159	0.156923533	-2.167311613	-1.352905273	-0.259408918	0.348438298	-181.5862427	98.90020752	26.93116389	0.404753052	283.3271363	1.12	1
-0.110029226	0.218830643	-77.79066249	-1.208129883	-0.114313754	0.416147345	-80.81982422	130.0279541	35.53293927	0.524817503	371.0459746	12.80	1
-0.183610102	0.217107709	-128.7106816	-1.073120117	-0.235805016	0.299442601	-165.2993164	100.6848145	22.59237529	0.52085628	365.120252	12.72	1
-0.023731024	0.318146736	-16.61171685	-1.330444336	-0.064385986	0.490787944	-45.07019043	93.51745605	27.82314226	0.486989879	340.8929156	2.47	1
-0.029041087	0.163530697	-20.50300711	-0.957702637	-0.177588185	0.354092661	-125.3772583	98.61315918	27.58114707	0.418836975	295.6989043	0.25	1
-0.071961529	0.098342511	-50.58895497	-1.061401367	-0.249820801	0.312922848	-175.6240234	116.5037842	34.5393027	0.39486095	277.5872475	0.80	1
-0.100755602	0.383374936	-70.83118816	-1.539428711	-0.08493628	0.527366362	-59.71020508	104.6320801	26.21864514	0.545929387	383.7883588	11.72	1
0.045084937	0.147227686	31.69471069	-0.972839355	-0.028995346	0.242176304	-20.38372803	127.163147	31.79049178	0.43617531	306.6312432	14.45	1
-0.266781018	0.268676934	-187.2802749	-1.587036133	-0.157906991	0.530408293	-110.850708	110.4232178	26.64105444	0.580865245	407.7674019	1.85	1
-0.055119439	0.230461922	-38.96944363	-1.88861084	-0.257809565	0.56749857	-182.2713623	120.4436035	33.65637827	0.453701384	320.7668788	0.65	1
-0.089645696	0.373184416	-63.11056974	-1.206298828	-0.175886067	0.442085759	-123.8237915	131.2258911	30.31841484	0.492789745	346.9239807	17.99	1
-0.165174304	0.325448277	-116.4478842	-1.317993164	-0.135515189	0.434688523	-95.53820801	140.4367676	35.64772525	0.557554725	393.0760814	20.11	1
-0.190539237	0.348382072	-133.9490839	-1.274902344	-0.220029394	0.51011948	-154.6806641	110.0936279	26.13853247	0.54398321	382.4201964	10.77	1
-0.252906914	0.212737221	-178.0464675	-1.357543945	-0.301388307	0.370621127	-212.1773682	119.2862549	27.72925143	0.544054951	383.0146857	13.73	1
-0.282730656	0.391314088	-199.6078429	-1.874206543	-0.268127355	0.57463935	-189.2979126	123.2741699	30.95383972	0.546068661	385.5244748	16.76	1
-0.050941043	0.230807521	-36.01531713	-1.549926758	0.090253298	0.420250356	63.80908203	122.4249268	32.07869183	0.580030465	410.0815388	2.70	1
0.040174045	0.093698792	28.40305017	-0.679016113	0.001472009	0.231070334	1.040710449	149.5059204	38.72994397	0.476919192	337.1818686	18.68	1
-0.121598036	0.336930595	-86.21300721	-0.950500488	-0.200715876	0.445753358	-142.3075562	118.0251465	26.58115519	0.505817312	358.6244741	15.29	1
-0.059577943	0.290458622	-42.06202782	-1.419921875	-0.0542606	0.438805187	-38.3079834	129.4472046	30.88747107	0.526648553	371.8138787	12.72	1
-0.198875974	0.441199726	-140.0086853	-1.622619629	-0.173654816	0.61601921	-122.2529907	115.4589844	30.35175011	0.541452807	381.1827761	12.36	1
-0.113276436	0.150805692	-79.63333437	-1.011108398	-0.062067111	0.300129303	-43.63317871	97.34350586	23.56248406	0.544139727	382.5302278	10.10	1
-0.030230698	0.24728302	-21.34287246	-1.040405273	0.123342109	0.426820847	87.07952881	180.5360718	47.56690921	0.565135645	398.9857652	13.89	1
0.088842581	0.319491929	62.10096419	-1.05078125	0.192150111	0.514543268	134.3129272	193.9230957	48.69319628	0.537963267	376.0363235	12.37	1
-0.077255429	0.15979769	-54.23331135	-0.754577637	-0.075034552	0.241140955	-52.67425537	151.9987183	38.86796838	0.516435588	362.5377831	23.91	1
0.0670777	0.150854844	47.08854572	-0.513427734	0.125545752	0.258177878	88.13311768	146.2305908	35.83743631	0.497211858	349.0427245	19.68	1
-0.174591169	0.178079125	-122.2138184	-1.284179688	-0.142935268	0.264292446	-100.0546875	118.6988525	29.00760358	0.544061923	380.8433461	17.04	1
-0.204757647	0.161749419	-143.7398682	-1.30871582	-0.224186476	0.368558854	-157.3789063	144.4208984	39.01862942	0.512865185	360.0313596	18.46	1
-0.223138485	0.134748027	-157.5357707	-1.107543945	-0.234606864	0.330204479	-165.6324463	136.8922119	35.08619053	0.526553734	371.7469363	16.21	1
-0.256731141	0.402991594	-181.5089169	-1.675048828	-0.281196476	0.50824332	-198.8059082	133.2591553	32.34216578	0.552292284	390.4706447	19.89	1
-0.166357114	0.161958322	-116.2836228	-1.088378906	-0.16569936	0.292295375	-115.8238525	113.553833	27.31159492	0.534273731	373.4573377	14.91	1
0.032005219	0.115629618	22.59568478	-0.791015625	0.010959528	0.267890799	7.737426758	125.9111328	27.78139586	0.484294164	341.9116801	13.29	1
-0.127525099	0.099078587	-89.39509448	-0.887329102	-0.20587254	0.260618025	-144.3166504	108.307251	30.04803626	0.493453549	345.9109377	10.66	1
-0.123902102	0.322091869	-87.10317764	-1.320922852	-0.134586426	0.414146492	-94.61425781	126.7612305	26.82358113	0.526993624	370.4765177	5.46	1
-0.239330085	0.273698744	-169.2063701	-1.48828125	-0.23056026	0.418901026	-163.0061035	110.0330811	28.0400681	0.540811895	382.3540094	14.36	1
-0.067304055	0.262479207	-47.11283834	-1.499023438	-0.012702462	0.417449016	-8.891723633	93.93444824	22.15711719	0.557109376	389.9765631	10.19	1
-0.143674592	0.090920516	-101.5779362	-0.907592773	-0.192500394	0.308336257	-136.0977783	124.6846924	33.91386706	0.499798302	353.3573994	11.95	1
-0.159026537	0.272468278	-111.9546823	-1.247314453	-0.117447766	0.409194076	-82.68322754	117.5571289	30.27329454	0.54018045	380.2870371	12.24	1
-0.266937259	0.243843305	-186.3222069	-1.432617188	-0.290173025	0.42707021	-202.5407715	114.8977051	30.26915164	0.539035625	376.2468663	12.21	1
-0.057417767	0.293378044	-40.36469008	-0.917724609	-0.031531474	0.43829182	-22.16662598	124.0100098	31.82126931	0.515839236	362.6349832	15.47	1
-0.243007402	0.238551405	-172.0492404	-1.274536133	-0.233126538	0.534500388	-165.0535889	139.1488037	33.16345743	0.536727574	380.0031226	10.44	1
-0.188160598	0.300235414	-133.0295425	-1.715576172	-0.154784811	0.478776288	-109.4328613	107.4569092	27.39514761	0.559535638	395.5916963	11.19	1
-0.068826538	0.09315355	-48.72918913	-0.733276367	-0.080600027	0.253325632	-57.06481934	108.9467773	24.70601257	0.505966569	358.2243309	13.12	1
-0.231783226	0.163081648	-162.9436079	-1.21105957	-0.261809738	0.226929279	-184.0522461	96.8494873	23.09470908	0.517961913	364.1272247	12.48	1
-0.238011833	0.193253422	-168.0363539	-1.517333984	-0.236386567	0.28607677	-166.888916	97.02319336	23.1062631	0.543693461	383.8475831	12.53	1
-0.078879526	0.210232876	-55.0579093	-1.399291992	-0.178157599	0.373944608	-124.3540039	107.3636475	27.21457939	0.479975819	335.0231217	10.54	1
-0.081461439	0.187192869	-57.51177579	-0.931762695	-0.169286971	0.358100896	-119.5166016	108.2219238	26.38850638	0.489550598	345.622722	13.87	1
-0.03235567	0.283238249	-22.84310336	-1.008789063	0.015036434	0.410619933	10.61572266	99.5324707	25.66006232	0.513518734	362.5442265	12.20	1
-0.146422446	0.275677986	-103.3742467	-1.330688477	-0.178891449	0.407214949	-126.2973633	104.3829346	23.84458898	0.516097076	364.3645357	12.09	1
-0.149566997	0.267472469	-105.444733	-1.471557617	-0.197517904	0.362095338	-139.2501221	92.81176758	23.95502659	0.522806141	368.5783295	8.12	1
-0.188453296	0.238418005	-133.0480269	-1.258422852	-0.165926925	0.374501139	-117.1444092	120.9898682	27.12366577	0.547567724	386.5828135	9.95	1
0.07234129	0.17102892	51.14529208	-0.811767578	0.010675368	0.32557567	7.547485352	111.7432861	28.35840704	0.453936329	320.9329846	10.46	1
-0.135056901	0.219391457	-96.1605136	-1.093017578	-0.186523095	0.416368372	-132.8044434	107.8770752	23.02178478	0.504189645	358.983027	13.02	1
-0.182962128	0.37344687	-129.3542243	-1.727539063	-0.242595926	0.587886834	-171.5153198	115.4954224	31.12123177	0.521901527	368.9843794	6.64	1
-0.073051642	0.143685314	-51.28225291	-1.105834961	-0.126448846	0.375892633	-88.76708984	124.0001221	27.51668477	0.505278153	354.7052632	10.97	1
-0.220087668	0.261017096	-154.0613675	-1.848999023	-0.228748256	0.413205464	-160.1237793	127.9471436	33.13138035	0.532628658	372.8400608	15.20	1
-0.239466106	0.23415985	-168.3446725	-1.317321777	-0.225681788	0.404709654	-158.6542969	139.2947998	35.64278888	0.53747319	377.8436522	16.05	1
-0.116894147	0.215680669	-82.76105593	-1.079101563	-0.228550453	0.401311423	-161.8137207	104.9454346	23.18314603	0.492452777	348.6565659	10.40	1
-0.202180185	0.25739713	-142.941391	-1.278564453	-0.232917581	0.476762959	-164.6727295	123.7352295	30.92775253	0.527842387	373.1845674	11.96	1
0.01927084	0.228126926	13.56667159	-1.300170898	0.019116662	0.457857654	13.45812988	153.4559326	32.44028061	0.501421352	353.000632	10.82	1
-0.2551483	0.339377141	-179.8795512	-3.098876953	-0.323672637	0.595122701	-228.189209	116.7825928	33.40438781	0.488975521	344.7277424	6.80	1
-0.135190295	0.259188791	-95.03877717	-1.77331543	-0.220765983	0.625653405	-155.1984863	122.166748	35.84684169	0.487008702	342.3671175	2.06	1
0.07524468	0.412459586	52.97225475	-1.466064453	0.100056388	0.546736938	70.43969727	133.9967041	34.17560926	0.510860042	359.6454694	9.16	1
-0.078985627	0.169767544	-55.36892458	-0.831420898	-0.021743143	0.377672365	-15.24194336	120.4888916	33.17997151	0.543691073	381.1274424	5.69	1
-0.034229064	0.142744967	-24.1657191	-1.336730957	-0.077444882	0.340278206	-54.67608643	115.4182739	31.84185583	0.488268386	344.7174804	3.99	1
0.043944231	0.225865869	30.84885013	-0.726074219	0.05415053	0.333314942	38.01367188	125.3153076	28.54252281	0.509967545	357.9972166	11.62	1
-0.183954232	0.25312977	-130.0556423	-1.064819336	-0.24894505	0.341904008	-176.0041504	111.0231934	26.6383704	0.521870589	368.9625068	14.73	1
-0.337630269	0.316896747	-239.3798606	-1.731933594	-0.340360784	0.452033123	-241.3157959	123.0244141	30.94008596	0.557734295	395.4336155	16.02	1
-0.078701997	0.459840541	-55.64231157	-1.489746094	0.030055886	0.585881509	21.24951172	151.270752	36.69329779	0.573253332	405.290106	13.83	1
-0.094174217	0.241249196	-66.29864849	-0.897583008	-0.069404949	0.332050432	-48.86108398	148.9313965	36.2186835	0.535143974	376.7413578	16.14	1
-0.160041843	0.143491117	-112.6694576	-1.087890625	-0.170835148	0.2659722	-120.2679443	102.5487061	27.9451974	0.514671656	362.3288458	10.91	1
-0.215871812	0.274738865	-152.1896275	-1.632446289	-0.069646741	0.489012778	-49.10095215	120.7080078	29.58351692	0.623144307	439.3167367	5.31	1
-0.013923122	0.121422931	-9.829724214	-1.514282227	-0.003570989	0.339081048	-2.521118164	139.3720703	34.60188214	0.524265713	370.1315932	16.60	1
-0.214949907	0.252944663	-151.1097848	-1.328491211	-0.108960169	0.457096348	-76.59899902	106.7366943	26.89698396	0.5753495	404.4706985	1.41	1
-0.138004242	0.19253075	-97.0169824	-0.864624023	-0.146195782	0.275327182	-102.7756348	84.98693848	19.56565743	0.539730134	379.4302844	10.86	1
-0.099792095	0.230917946	-70.05405054	-1.140625	-0.189260977	0.35343915	-132.8612061	137.0842285	35.6196048	0.490650244	344.436471	16.99	1
-0.187410813	0.310255812	-131.5623905	-1.262573242	-0.167004534	0.385449723	-117.2371826	104.6433105	25.18865117	0.539371072	378.6384926	12.50	1
-0.13721223	0.21595153	-97.00904635	-1.297729492	-0.229415095	0.33866728	-162.1964722	121.1151123	32.00661408	0.500688332	353.986651	15.57	1
-0.148296856	0.317995912	-104.2526895	-1.430541992	-0.047060363	0.555903752	-33.08343506	143.9897461	38.93489504	0.571999226	402.1154561	4.13	1
-0.137209986	0.25961143	-96.87025013	-1.045654297	-0.130498351	0.349700438	-92.13183594	131.1481934	31.28246124	0.525530687	371.0246651	16.70	1
0.066820097	0.146968701	46.77406766	-0.960327148	-0.083173043	0.319699318	-58.22113037	103.1168213	28.67923571	0.372884059	261.0188416	3.59	1
-0.18223947	0.302783272	-128.2965868	-1.463378906	-0.074119568	0.445178329	-52.18017578	112.7485352	28.56940879	0.606773298	427.168402	9.56	1
0.045123941	0.154591146	31.7221307	-0.892578125	0.062584216	0.373740259	43.9967041	110.7814941	27.87690862	0.530901911	373.2240436	6.98	1
-0.095470332	0.264949425	-66.82923241	-1.678955078	-0.186181641	0.491306638	-130.3271484	101.3658447	27.94034951	0.508677733	356.0744134	1.73	1
-0.215233964	0.381879164	-151.3094765	-1.741943359	-0.227267486	0.612731338	-159.769043	120.2113037	30.05399193	0.553890792	389.3852268	12.21	1
-0.146562191	0.265496113	-102.886658	-1.217407227	-0.091584556	0.388693219	-64.2923584	137.5693359	34.29837724	0.56683	397.9146603	17.64	1
-0.340240902	0.292623629	-240.2100766	-1.940917969	-0.326867641	0.43984221	-230.7685547	121.8657227	30.22679818	0.563397311	397.7585013	17.72	1
-0.155414091	0.241793662	-109.2561062	-1.192382813	-0.202755924	0.345337026	-142.5374146	95.78356934	22.5653187	0.510393656	358.8067401	12.32	1
-0.296710863	0.228520309	-208.5877368	-1.470092773	-0.32255526	0.327012747	-226.7563477	120.4073486	28.26682785	0.545112301	383.2139478	15.95	1
-0.145217304	0.265004429	-102.3781992	-1.242553711	-0.202872202	0.435021414	-143.0249023	121.0894775	31.54578906	0.51254397	361.3434988	10.45	1
-0.117161525	0.113127845	-82.83319789	-0.583618164	-0.024458609	0.258217457	-17.29223633	113.0280762	28.39460627	0.57424943	405.994347	11.61	1
0.077939383	0.526331273	55.0252045	-1.514282227	0.139271679	0.640596323	98.32580566	155.1057739	38.81322262	0.50651961	357.602845	21.28	1
-0.109088719	0.208526415	-76.58028058	-1.221923828	-0.098459793	0.410171722	-69.11877441	110.2810059	29.99040717	0.522914756	367.0861589	10.15	1
-0.144294172	0.375377067	-101.8716857	-1.693786621	-0.114315562	0.515357098	-80.70678711	133.7971802	32.94211631	0.538705799	380.3262943	17.14	1
-0.023056808	0.209818097	-16.30116299	-1.000854492	-0.027138803	0.365004546	-19.18713379	133.5255127	31.63845901	0.507949591	359.1203609	14.11	1
-0.198254273	0.210408867	-139.3727541	-1.220092773	-0.231758215	0.357189727	-162.9260254	103.0498047	24.88684375	0.540761998	380.1556849	13.04	1
-0.094676858	0.090589002	-66.55783101	-0.707519531	-0.137520802	0.218408176	-96.67712402	127.8457031	31.38950497	0.492567542	346.2749818	18.31	1
-0.186428381	0.149602426	-131.4320085	-1.032348633	-0.211545427	0.277464221	-149.1395264	109.1599121	26.53254335	0.52844458	372.5534287	14.22	1
-0.050972059	0.127494035	-35.68044122	-0.965698242	-0.097274867	0.396037289	-68.09240723	115.0869141	25.1007272	0.505685345	353.9797417	10.83	1
-0.175426544	0.192322333	-124.2019935	-1.124267578	-0.190431239	0.307922221	-134.8253174	112.7365723	28.0283582	0.51523498	364.7863659	14.54	1
-0.142075028	0.186926016	-100.3049694	-1.127197266	-0.140470424	0.296582339	-99.17211914	120.3380127	26.80211202	0.532005579	375.5959389	15.01	1
-0.184710218	0.238055826	-130.5901238	-1.233886719	-0.208772004	0.33281756	-147.6018066	123.4772949	30.19657796	0.517429456	365.822625	16.24	1
-0.153816329	0.126880286	-108.7481447	-0.764282227	-0.126104503	0.270512111	-89.15588379	114.3052979	27.10670614	0.537105253	379.7334138	15.43	1
-0.201804633	0.17172607	-140.8596337	-1.025390625	-0.286364886	0.355962701	-199.8826904	129.8897705	31.95284687	0.519331369	362.4932958	16.68	1
-0.016453886	0.179460872	-11.63289744	-1.20690918	-0.032104492	0.360648441	-22.69787598	152.5257568	38.64675098	0.491059767	347.1792555	18.32	1
-0.096531474	0.25041151	-68.15122055	-1.020019531	-0.110654145	0.330354082	-78.12182617	119.6074219	25.9908452	0.52431484	370.166277	8.75	1
-0.034941884	0.137156258	-24.49426041	-0.88671875	-0.098379965	0.35010703	-68.96435547	123.3154297	30.58727661	0.492483848	345.2311772	11.50	1
-0.153526556	0.182690919	-108.0826957	-1.131225586	-0.082760031	0.331966367	-58.26306152	107.3554688	27.91968042	0.550272135	387.3915832	10.95	1
-0.101897357	0.321632196	-71.53194427	-1.222900391	-0.12667438	0.446717908	-88.92541504	121.7143555	33.07517152	0.513320752	360.3511677	14.43	1
-0.253779424	0.283202993	-177.6455968	-1.881958008	-0.302091413	0.483496761	-211.4639893	112.1380615	26.78611548	0.548531805	383.9722637	11.47	1
-0.12230051	0.167694736	-86.3441598	-1.374389648	-0.123890474	0.347780957	-87.4666748	112.2080078	24.94420545	0.523016266	369.249484	9.37	1
-0.09199707	0.227905022	-64.48994612	-0.987182617	-0.104032639	0.342465455	-72.92687988	102.987793	27.93651494	0.512619455	359.3462377	14.16	1
0.045732552	0.132727968	32.33291435	-0.827148438	0.059580154	0.379560373	42.12316895	141.1246338	33.43888438	0.510148211	360.6747855	14.91	1
-0.198698879	0.213655605	-140.4801072	-1.736816406	-0.203839465	0.33836275	-144.114502	108.9207764	25.92565952	0.538267542	380.5551519	13.47	1
-0.092308363	0.161957755	-65.26201253	-1.408325195	-0.11195885	0.32397217	-79.15490723	119.4814453	27.19062703	0.532856088	376.7292544	12.44	1
0.015433032	0.141984418	10.8494218	-0.885253906	-0.008487446	0.352848293	-5.966674805	141.9812012	35.38465271	0.490183617	344.5990825	16.55	1
-0.09152619	0.135367019	-64.25138513	-1.374633789	-0.064192117	0.413241354	-45.06286621	99.27319336	23.61895264	0.539885363	378.999525	9.39	1
-0.016051064	0.186699513	-11.31599996	-1.930664063	-0.065750187	0.528203412	-46.35388184	104.7186279	24.1136926	0.509609474	359.2746792	4.67	1
0.039098858	0.265608582	27.64289296	-1.602233887	-0.077065906	0.551387631	-54.4855957	146.3598022	40.45779827	0.465616871	329.191128	0.37	1
0.006354636	0.120776761	4.486373297	-1.04901123	-0.19751331	0.309301603	-139.444397	128.9833374	35.78821838	0.402674753	284.2883756	1.26	1
-0.011255024	0.196850678	-7.923537147	-1.172241211	-0.141804869	0.323273485	-99.83062744	104.5892334	26.27271088	0.436452465	307.2625353	1.25	1
-0.023151872	0.251821715	-16.36837379	-1.063964844	-0.047491049	0.41903144	-33.57617188	111.6365967	28.48188217	0.498755989	352.6204845	11.71	1
-0.033039443	0.117164128	-23.2597676	-1.43939209	-0.227075143	0.319612687	-159.8609009	109.2601929	28.55622043	0.402084949	283.067804	0.28	1
-0.033787368	0.121191307	-23.88766923	-1.129516602	-0.10211691	0.330613976	-72.19665527	137.2249756	34.74295791	0.465861191	329.3638622	18.40	1
-0.192388251	0.153554797	-135.2489407	-0.924194336	-0.236596402	0.235316376	-166.3272705	109.5465088	27.11011674	0.511546272	359.6170293	14.51	1
-0.199754901	0.220132804	-140.0281853	-0.903442383	-0.269986968	0.271905463	-189.2608643	146.1964111	38.47093526	0.514461126	360.6372491	21.04	1
-0.128819768	0.176509409	-90.94675647	-0.885742188	-0.139660368	0.232023791	-98.60021973	135.6038818	35.53345009	0.524174177	370.066969	21.81	1
-0.16498979	0.234741151	-116.6477816	-1.372192383	-0.244234379	0.305294365	-172.6737061	143.230957	36.39466271	0.488839399	345.6094553	17.62	1
-0.122580468	0.165629926	-86.05148847	-1.209960938	-0.273191273	0.416531071	-191.7802734	116.309082	32.65249537	0.403808408	283.4735022	3.84	1
-0.05340725	0.239341816	-37.4918896	-1.965820313	-0.135237648	0.434695437	-94.93682861	105.0861816	27.58949542	0.501728676	352.2135308	4.15	1
-0.080672123	0.155379729	-56.63183006	-0.664916992	0.022912615	0.299047587	16.08465576	122.3460693	31.60261984	0.561682869	394.3013741	8.67	1
0.009016477	0.109575266	6.383665939	-0.860473633	0.045731022	0.249392105	32.37756348	128.9002686	30.57124733	0.513006261	363.2084328	14.50	1
0.016547872	0.18882427	11.68279758	-1.621643066	0.097009675	0.375306909	68.48883057	107.0595093	27.36694031	0.541433116	382.2517801	8.95	1
0.020780483	0.147080045	14.69180155	-0.886779785	-0.059305366	0.337418528	-41.92889404	119.5302734	33.28592207	0.440058938	311.121669	5.64	1
0.033986678	0.106358111	23.99459478	-0.78729248	0.04664253	0.317729508	32.92962646	105.8811035	30.07625619	0.474769783	335.1874669	5.20	1
0.036276716	0.093838047	25.61136143	-0.787475586	-0.004944021	0.292253589	-3.490478516	71.52050781	20.11585525	0.407697023	287.8340984	1.09	1
-0.051360242	0.203408797	-36.36305101	-1.703369141	-0.227282594	0.544666529	-160.9160767	67.90386963	18.93761331	0.474890103	336.222193	0.51	1
-0.154732665	0.216843914	-109.7054593	-1.141967773	-0.130997285	0.352801477	-92.8770752	124.748291	32.48620266	0.544100887	385.7675291	13.31	1
0.150336515	0.287338503	106.2879158	-0.702636719	0.275839367	0.386089445	195.0184326	134.2592773	35.52099051	0.540001436	381.7810155	13.66	1
0.003393047	0.099079364	2.398884319	-0.690979004	-0.099243941	0.2610455	-70.16546631	88.26165771	21.73255168	0.43507139	307.5954731	4.84	1
0.058927197	0.100487793	41.4258194	-0.662109375	-0.003618004	0.300637033	-2.543457031	164.4868164	40.32603067	0.47613635	334.7238543	22.36	1
0.017248611	0.122944011	12.16027053	-0.845397949	-0.13818723	0.310030704	-97.42199707	97.37579346	27.19571247	0.372886332	262.8848643	2.38	1
0.028407731	0.233732158	20.02745034	-2.082702637	-0.00371795	0.525279037	-2.621154785	85.3583374	22.15206968	0.5056399	356.4761295	0.96	1
-0.057944822	0.198995206	-40.85109956	-0.728393555	-0.040833299	0.333721808	-28.78747559	100.5852051	24.61033665	0.519578298	366.3027003	13.08	1
0.006280364	0.147419716	4.421376354	-0.770019531	0.0755154	0.353557068	53.1628418	131.7802734	35.03158335	0.521025188	366.801732	11.41	1
-0.099389394	0.197815025	-70.46708006	-0.991333008	-0.188210728	0.34519681	-133.4414063	106.4287109	24.88699554	0.493433587	349.8444134	13.57	1
0.035106105	0.159993762	24.82001623	-0.802978516	0.075583279	0.342047183	53.43737793	143.0806885	36.66431182	0.522282762	369.253913	11.87	1
0.114830457	0.222355766	81.18513313	-0.970703125	0.151246498	0.411356771	106.9312744	103.1168213	25.30571017	0.510153975	360.6788606	9.56	1
0.030965052	0.138214359	21.76843138	-0.944702148	0.042382014	0.315936777	29.79455566	125.5494385	30.03318876	0.509563171	358.222909	15.71	1
-0.118630317	0.311536882	-83.63437367	-1.035644531	-0.082868254	0.411096537	-58.42211914	140.710083	35.88128675	0.520718929	367.1068449	18.63	1
-0.014369153	0.229610504	-10.17336014	-1.371337891	0.07087423	0.499675158	50.17895508	127.0123291	33.8457495	0.540026111	382.3384867	3.07	1
0.028948893	0.161671876	20.32212261	-0.891235352	-0.05366277	0.296638538	-37.67126465	117.631958	30.91123038	0.452489075	317.6473303	11.65	1
0.066171638	0.208576986	46.78334827	-0.99230957	0.150767023	0.467021541	106.5922852	142.1175537	37.52438518	0.516831536	365.3998958	7.31	1
-0.167778646	0.221474392	-118.1161668	-1.569824219	-0.216521176	0.412437321	-152.4309082	119.1130371	30.8349544	0.51671128	363.764741	13.05	1
-0.260892561	0.324939773	-184.4510403	-1.930053711	-0.34494066	0.535058862	-243.8730469	111.0710449	28.72993237	0.515581539	364.5161481	10.87	1
-0.172851967	0.223983604	-121.8606364	-1.341796875	-0.269281742	0.319108823	-189.8436279	120.9825439	28.72154658	0.492942372	347.5243724	16.18	1
-0.150647947	0.202067751	-106.5080987	-1.25769043	-0.195124474	0.321193745	-137.9530029	104.1767578	26.18373897	0.494914034	349.904222	10.79	1
-0.045250372	0.190358327	-31.85626214	-1.136108398	-0.095750462	0.351269494	-67.4083252	95.19519043	22.67884498	0.493646955	347.5274565	14.38	1
-0.183158838	0.228194363	-129.4932984	-1.462768555	-0.263754924	0.38790546	-186.4747314	107.6087646	26.68677851	0.512682659	362.4666402	13.51	1
-0.169727592	0.195880831	-119.3184972	-1.215087891	-0.21543639	0.352810217	-151.4517822	106.8096924	26.3310458	0.516333756	362.9826304	7.95	1
-0.097667626	0.296401834	-68.66034126	-1.138793945	-0.117417228	0.461091291	-82.54431152	128.2265625	33.70710783	0.506127271	355.8074714	16.33	1
0.013339626	0.257883832	9.364417643	-1.065673828	-0.061687589	0.432957713	-43.3046875	130.9910889	33.50282653	0.469882346	329.8574069	13.88	1
-0.226392529	0.297531409	-159.8331252	-1.366943359	-0.310234437	0.448724135	-219.0255127	130.34729	29.41102728	0.536511696	378.7772576	16.69	1
-0.150207049	0.228830508	-106.1963834	-1.019165039	-0.027090976	0.562287546	-19.15332031	128.5175781	36.30912421	0.572045789	404.4363727	1.27	1
-0.009432748	0.117646132	-6.678385754	-0.937133789	-0.035974018	0.341287748	-25.46960449	131.8172607	34.74400292	0.481883523	341.1735345	15.64	1
-0.169579691	0.242614732	-119.5536821	-1.342651367	-0.298596105	0.344080334	-210.5102539	105.5445557	24.68649324	0.494697792	348.7619437	9.45	1
-0.209289256	0.272369911	-146.921058	-1.679199219	-0.234524023	0.462554988	-164.6358643	114.7913818	29.13198246	0.527603397	370.3775846	8.63	1
-0.146323874	0.165896387	-102.7193599	-1.251831055	-0.223195307	0.348672028	-156.6831055	108.8562012	26.73479783	0.504616665	354.2408986	13.81	1
-0.021695784	0.177876079	-15.33891927	-0.883056641	-0.067011767	0.344287643	-47.37731934	123.9433594	30.79953262	0.49109852	347.2066534	15.05	1
-0.039517944	0.14619442	-28.01822248	-0.787963867	-0.04388488	0.211490307	-31.11437988	76.75268555	20.58661232	0.510522778	361.9606499	9.17	1
-0.206113207	0.283894823	-144.8975849	-1.239868164	-0.291311164	0.437543842	-204.791748	123.2359619	28.49806975	0.510334623	358.7652399	13.33	1
-0.056581304	0.219719061	-40.05956337	-1.088134766	-0.087444586	0.308661149	-61.9107666	121.9195557	30.02912869	0.508760435	360.2023882	15.73	1
-0.098300502	0.23328464	-69.6950561	-1.123413086	-0.055703146	0.455096835	-39.49353027	117.5649414	29.48820187	0.522254487	370.2784313	7.09	1
0.009563882	0.149038706	6.742536818	-0.94128418	-0.047419035	0.281088811	-33.43041992	145.3564453	36.56575656	0.485502651	342.2793689	20.72	1
-0.239312897	0.266504647	-169.4335313	-1.313842773	-0.196411995	0.464024204	-139.0596924	136.439209	35.64203746	0.586028674	414.9083008	15.87	1
-0.078470413	0.207957872	-54.92928876	-0.981201172	-0.131867153	0.312572616	-92.30700684	118.9588623	30.14919392	0.49925085	349.4755952	16.64	1
0.044050984	0.100650615	30.96784166	-0.728515625	0.115819201	0.311898424	81.42089844	136.6369629	37.18290011	0.538767505	378.7535558	16.50	1
0.081364685	0.162959063	57.60619682	-1.183105469	0.057713395	0.376517533	40.86108398	146.9396973	37.95004037	0.484670143	343.1464613	19.29	1
-0.018940219	0.153204748	-13.39073515	-1.032470703	-0.008784228	0.303996572	-6.210449219	133.5214844	35.35042493	0.495565732	350.3649722	18.20	1
-0.147128433	0.187395898	-103.5784169	-1.099731445	-0.139153741	0.356572756	-97.9642334	142.5928955	33.76673911	0.533000449	375.2323161	18.31	1
-0.155958183	0.216035662	-109.9505187	-1.140991211	-0.224152953	0.424726583	-158.027832	145.1650391	38.06496202	0.506844372	357.3252819	12.12	1
0.024767202	0.14088925	17.48564457	-0.876098633	0.012628917	0.320601332	8.916015625	150.269043	38.47701781	0.505747353	357.057631	20.48	1
-0.126575466	0.18942726	-88.98255287	-0.988037109	-0.204307328	0.359143098	-143.6280518	111.4337158	28.35906616	0.511435681	359.5392836	13.36	1
-0.034172918	0.186957195	-24.05773443	-0.82409668	-0.03646209	0.419616948	-25.66931152	174.1661377	46.04212904	0.510830915	359.624964	19.21	1
0.02667731	0.111577359	18.72747166	-0.755493164	0.117281922	0.455342253	82.33190918	171.3304443	47.50534191	0.521648404	366.1971796	5.54	1
0.017900547	0.168218328	12.65568666	-0.820800781	-0.122226569	0.315653492	-86.41418457	122.8074951	29.4077403	0.439959583	311.0514254	12.77	1
-0.03021189	0.092002558	-21.26917057	-0.850708008	-0.037197633	0.342752378	-26.18713379	132.4576416	34.67838009	0.490035309	344.9848576	15.89	1
0.012556	0.12159622	8.877092132	-0.69519043	0.039091161	0.302189575	27.63745117	142.2440186	37.5935476	0.51146612	361.606547	20.07	1
0.084369566	0.154974326	59.31180496	-0.872192383	0.127925346	0.280835704	89.93151855	159.2698975	40.9283152	0.51519668	362.1832658	22.06	1
0.046196989	0.090636504	32.61507458	-0.669067383	0.076319362	0.269324294	53.88146973	142.824707	35.69268143	0.51088461	360.6845346	19.06	1
-0.026226952	0.17015952	-18.51622797	-1.181152344	-0.084950217	0.344739252	-59.97485352	159.0247803	41.42181443	0.480711638	339.3824166	14.73	1
0.084954279	0.364570067	59.97772114	-1.068847656	0.154333012	0.515646724	108.9591064	171.1021729	45.07233186	0.508261584	358.8326781	17.17	1
-0.058885336	0.299141926	-41.63193259	-1.061157227	0.174563137	0.433986621	123.4161377	120.4986572	32.21071899	0.630821533	445.990824	0.87	1
-0.109825184	0.258868948	-77.64640479	-1.537353516	-0.084205034	0.398164353	-59.53295898	98.85009766	24.80173989	0.533031484	376.8532588	11.35	1
-0.093214002	0.235843466	-65.90229968	-1.323974609	-0.173219327	0.364086672	-122.4660645	123.5849609	29.37164783	0.512446851	362.2999236	12.96	1
-0.059048548	0.139631823	-41.62922646	-0.733642578	-0.061661784	0.240945812	-43.47155762	130.543457	35.14610761	0.496972801	350.3658251	17.73	1
-0.107304085	0.148403844	-75.32746758	-1.008911133	-0.138763515	0.30268398	-97.4119873	112.3881836	26.87722229	0.512365334	359.6804648	15.03	1
-0.079627091	0.183615183	-56.21672625	-0.989013672	-0.129803104	0.280184936	-91.64099121	110.7167969	29.59234421	0.499970024	352.9788373	12.79	1
-0.101732853	0.316804189	-71.31473027	-1.788024902	-0.084270047	0.49754033	-59.07330322	137.5504761	36.06333667	0.532264751	373.1175903	12.43	1
-0.044792385	0.213938039	-31.62342347	-0.945678711	-0.15221753	0.353920169	-107.4655762	104.5454102	25.383045	0.45638382	322.206977	9.57	1
-0.087034076	0.161118876	-60.83681895	-1.196411133	-0.133312307	0.396082291	-93.18530273	104.0321045	28.37553705	0.508542255	355.4710364	15.03	1
-0.07857039	0.137932231	-55.54926606	-1.044433594	-0.08468002	0.37348718	-59.86877441	114.2697754	29.80563839	0.500635666	353.949416	12.73	1
-0.057327481	0.088203372	-40.3012191	-0.707641602	0.13046295	0.3545016	91.7154541	109.0065918	30.0077057	0.630701971	443.3834853	0.66	1
-0.098814836	0.207994634	-69.86208931	-1.384155273	-0.06571872	0.404095579	-46.46313477	118.6307373	30.97800062	0.530869936	375.3250444	7.19	1
-0.036327508	0.199271545	-25.68354843	-0.92175293	-0.100662944	0.311078233	-71.16870117	118.4871826	30.24325428	0.478464792	338.2746077	16.63	1
-0.107637528	0.183396449	-76.09973216	-0.99206543	-0.120936975	0.28686659	-85.50244141	84.46936035	20.85011243	0.520088338	367.7024553	5.55	1
-0.101247804	0.242781063	-71.07595868	-1.634399414	-0.087687174	0.355260823	-61.55639648	84.66906738	20.85079149	0.533280728	374.3630712	7.81	1
-0.069856478	0.146022459	-49.38853029	-0.969604492	-0.130119701	0.262351721	-91.99462891	88.56652832	20.74175245	0.493511498	348.9126294	11.34	1
-0.163985739	0.219835401	-115.9379178	-1.009033203	-0.150830044	0.315669675	-106.6368408	91.87109375	20.9174486	0.536759187	379.488745	11.32	1
-0.046115475	0.177250854	-32.55752525	-0.859863281	-0.147034037	0.276816697	-103.8060303	100.9822998	23.69973002	0.468686891	330.8929447	10.87	1
-0.104648322	0.130072872	-73.67241838	-1.42175293	-0.084203373	0.419795215	-59.2791748	122.8502197	29.72907828	0.547857051	385.6913639	14.02	1
-0.177217477	0.199251245	-125.4699734	-1.331420898	-0.273193877	0.384156836	-193.4212646	111.3513184	25.53128794	0.520652891	368.6222467	12.71	1
-0.170713735	0.266456684	-119.3289007	-1.333496094	-0.264138501	0.389374444	-184.6328125	67.13037109	15.25639665	0.498100245	348.1720713	5.25	1
-0.06222647	0.193657705	-43.68298203	-0.903198242	-0.128509956	0.285843818	-90.21398926	108.184082	27.86466201	0.478548668	335.9411649	15.02	1
0.15901778	0.158701621	111.6304812	-0.678588867	0.145202202	0.330060061	101.9319458	108.6462402	27.51285074	0.464676309	326.202769	12.81	1
-0.085730712	0.25030724	-60.61161318	-1.054077148	-0.128596153	0.416057525	-90.91748047	117.7958984	27.1947011	0.504043406	356.3586884	8.61	1
-0.017252883	0.174546632	-12.21504095	-0.787597656	-0.092672402	0.268602748	-65.61206055	123.8583984	34.13042909	0.480681868	340.3227623	13.47	1
-0.083883853	0.247729614	-59.3897682	-1.063598633	-0.093695861	0.351448559	-66.33666992	121.78125	31.32628735	0.509537074	360.7522484	14.55	1
-0.076106434	0.106339766	-53.80724885	-0.855834961	-0.031624153	0.228202968	-22.35827637	119.4000244	30.61477026	0.532851179	376.7257835	15.18	1
-0.057164343	0.163563284	-40.30086168	-1.235961914	-0.083665434	0.348498136	-58.98413086	90.71350098	21.47706229	0.520973401	367.2862479	9.41	1
-0.058858151	0.201717794	-41.37728005	-0.982666016	-0.08443515	0.334015198	-59.35791016	126.732666	33.42460537	0.505103102	355.0874807	18.25	1
-0.10385349	0.2000914	-73.11285666	-1.206665039	-0.16873325	0.368091473	-118.788208	93.89477539	22.80560484	0.510413972	359.3314363	10.08	1
-0.064510562	0.158227435	-45.60896713	-0.796020508	-0.099400284	0.268023303	-70.27600098	112.3356934	27.81737422	0.510077443	360.6247523	13.58	1
-0.193234549	0.253015142	-136.6168265	-1.434204102	-0.105171776	0.458287024	-74.35644531	99.33178711	27.25931252	0.594458032	420.2818289	3.24	1
-0.027733125	0.142547586	-19.4131878	-0.68347168	-0.023846784	0.251777388	-16.69274902	90.04772949	24.67426431	0.515948429	361.1639003	11.10	1
0.030388566	0.133925057	21.48471582	-0.720458984	-0.041168947	0.260043424	-29.10644531	117.8093262	30.14128788	0.469067338	331.630608	13.99	1
-0.008866432	0.140409033	-6.224235526	-0.983764648	-0.049490643	0.298525722	-34.74243164	123.3209229	31.19343769	0.4895943	343.6951984	18.82	1
0.031310336	0.169848928	22.04247648	-0.743164063	-0.013374329	0.306599278	-9.415527344	129.6518555	32.61513817	0.473262766	333.1769875	16.63	1
0.029467291	0.083171427	20.80390739	-0.693359375	-0.081037051	0.264272918	-57.2121582	105.3442383	26.31570827	0.433677533	306.1763383	7.40	1
-0.257431202	0.263802332	-180.7167039	-1.720703125	-0.300103082	0.424386358	-210.6723633	117.6225586	29.01722894	0.528761407	371.1905077	13.15	1
0.041979057	0.180117654	29.51127717	-0.698730469	0.038482362	0.269801706	27.05310059	113.2871094	30.56124394	0.487833467	342.946927	15.37	1
-0.103374434	0.148635246	-73.08572519	-0.985595703	-0.08937826	0.266558077	-63.19042969	118.3405762	30.23293569	0.530633249	375.1577072	15.87	1
-0.001626981	0.133789346	-1.145394388	-0.716552734	0.044773795	0.246109795	31.52075195	107.1483154	29.43780437	0.524625803	369.3365653	11.31	1
-0.039776245	0.12486394	-28.04225247	-0.79675293	-0.00080324	0.261637473	-0.56628418	82.77490234	20.02952741	0.532423484	375.3585562	9.59	1
-0.012177333	0.095671621	-8.609374532	-1.15625	-0.110627818	0.348517164	-78.21386719	79.03442383	17.88932221	0.481499902	340.420431	7.24	1
0.018379908	0.128309359	12.82917586	-0.674194336	0.026237947	0.311868417	18.31408691	102.2646484	26.9340501	0.50130562	349.9113229	12.90	1
-0.005785257	0.131881973	-4.084391417	-0.73815918	0.205240828	0.361441615	144.9000244	74.51599121	19.21286514	0.662449208	467.6891409	0.08	1
-0.159988849	0.231336411	-113.1121163	-1.194824219	-0.214452503	0.374686818	-151.6179199	135.0822754	36.29771323	0.525362351	371.4311818	18.01	1
-0.197584361	0.189821365	-138.7042215	-0.987182617	-0.176876057	0.307804553	-124.1669922	128.5239258	34.53441864	0.526196205	369.389736	16.72	1
0.022006427	0.174462178	15.58055059	-0.974853516	-0.050246244	0.371493066	-35.57434082	151.4697266	40.50042024	0.484821143	343.2533692	15.08	1
-0.128760611	0.230230486	-91.03375173	-1.303955078	-0.213083313	0.364612313	-150.6499023	91.39257813	22.00816449	0.490851211	347.0318058	9.79	1
-0.047546957	0.209269567	-33.18777568	-1.08996582	0.009577448	0.362886983	6.685058594	109.0388184	30.2511996	0.556333285	388.3206328	9.57	1
0.069411599	0.111499183	48.93517745	-0.708251953	0.126272994	0.304373014	89.02246094	143.2077637	38.72259088	0.531273114	374.5475455	11.29	1
-0.103813501	0.18084289	-73.49995858	-0.903686523	-0.131477313	0.276519119	-93.0859375	109.1472168	30.19658779	0.512231536	362.6599273	16.35	1
-0.094125586	0.254831787	-66.26441275	-1.257324219	-0.117585962	0.364149374	-82.78051758	123.3312988	30.13826991	0.516880047	363.883553	16.28	1
-0.09152314	0.170627912	-64.61533658	-1.09375	-0.105440048	0.27858574	-74.44067383	108.0140381	27.70422431	0.521998485	368.5309303	13.23	1
-0.169973336	0.292657556	-119.4912554	-1.568237305	-0.213373523	0.457919364	-150.0015869	110.0249023	25.51351276	0.530681925	373.0693933	12.09	1
-0.216005973	0.219838183	-152.9322286	-1.293579102	-0.177880928	0.380122203	-125.9396973	98.41577148	24.87373288	0.579196034	410.0707922	7.19	1
-0.131574551	0.271103823	-92.62848389	-1.397705078	-0.164102901	0.496617088	-115.5284424	107.1549072	25.91094597	0.519800913	365.9398426	3.60	1
-0.034452565	0.185396008	-24.35796371	-1.276611328	0.057552958	0.410949412	40.68994141	108.1120605	26.64928007	0.567897537	401.5035586	2.60	1
-0.013496415	0.309282928	-9.460986986	-1.141479492	-0.069119833	0.402061944	-48.45300293	136.5201416	34.49381077	0.484180315	339.4104005	19.31	1
-0.113160727	0.204247722	-79.09934852	-0.986206055	-0.043326753	0.351213441	-30.28540039	131.5843506	32.75668942	0.561128449	392.2287857	13.55	1
-0.206802763	0.207918725	-145.3823423	-1.130249023	-0.128364661	0.421164914	-90.24035645	128.213623	32.57034177	0.590820287	415.3466618	12.17	1
0.084028249	0.218243329	59.23991546	-1.387756348	-0.00571696	0.495095703	-4.030456543	124.9485474	34.99627513	0.446582707	314.8408085	1.24	1
-0.022738394	0.134480902	-16.07604487	-1.161621094	0.023333214	0.400194706	16.49658203	116.5113525	30.23853668	0.543579699	384.310847	11.92	1
-0.082594216	0.122884399	-58.31151678	-0.83996582	0.089423939	0.323920729	63.13330078	109.1411133	28.30073091	0.620874479	438.3373822	0.92	1
-0.042164446	0.223194397	-29.81026357	-1.065917969	0.022074698	0.386681474	15.60681152	131.9177246	31.78553259	0.532418251	376.4197034	13.74	1
-0.233384512	0.218643715	-165.2362342	-1.166870117	-0.267606229	0.437321206	-189.46521	135.6081543	32.37846463	0.53504602	378.8125825	15.07	1
-0.076067646	0.160570909	-53.77982606	-0.956420898	-0.066505529	0.335908502	-47.01940918	135.7366943	34.92735909	0.531689341	375.9043644	13.94	1
0.055364933	0.218437151	38.97691265	-0.923950195	0.150584134	0.407079031	106.0112305	151.9772949	41.40836347	0.525192231	369.7353308	9.89	1
-0.21369834	0.278366449	-150.8710278	-1.338745117	-0.185152135	0.479016236	-130.7174072	117.8961182	29.46176766	0.560107212	395.435692	13.66	1
-0.014682466	0.122005161	-10.38050349	-0.917724609	0.006281182	0.297138184	4.440795898	107.7254639	28.59026906	0.517219504	365.6741897	9.53	1
-0.184377429	0.219924121	-130.3548421	-1.244873047	-0.272665539	0.365283903	-192.7745361	116.6710205	29.4828371	0.505356519	357.2870587	14.51	1
-0.075189125	0.257783201	-53.23390072	-0.939208984	-0.197973909	0.356468914	-140.1655273	142.2318115	36.93509672	0.481169003	340.6676542	14.38	1
-0.205376516	0.280484352	-144.1743141	-1.735717773	-0.299371703	0.455953646	-210.1589355	141.0578613	37.4220956	0.501889388	352.3263504	9.88	1
-0.256815613	0.302508571	-182.0822698	-1.649658203	-0.237221873	0.53798304	-168.1903076	119.3745117	28.91935727	0.560203713	397.1844322	9.50	1
-0.250135707	0.187868293	-176.845945	-1.146362305	-0.241799189	0.358502088	-170.9520264	126.8967285	32.51013157	0.545191846	385.450635	16.49	1
-0.007185562	0.093953507	-5.05863573	-0.967773438	-0.014481111	0.429765775	-10.19470215	134.2333984	33.91372897	0.511142527	359.8443387	14.21	1
-0.18408733	0.225357223	-129.0452186	-1.630126953	-0.168097612	0.373046914	-117.8364258	106.3129883	26.04121983	0.542532657	380.3153924	9.44	1
-0.157071583	0.210790074	-111.0496094	-1.243286133	-0.17350646	0.387338863	-122.6690674	109.5496826	25.52855821	0.534263274	377.7241348	7.53	1
0.042897207	0.095161488	30.15673633	-1.1328125	-0.05993062	0.418440276	-42.13122559	97.74328613	24.36077577	0.413731988	290.8535875	6.18	1
-0.02900297	0.108127837	-20.38908776	-0.762573242	-0.112526255	0.26670403	-79.10595703	114.75354	30.68089021	0.471936957	331.7716805	10.88	1
-0.126928644	0.178998569	-89.10390843	-1.007202148	-0.170196968	0.311619402	-119.4782715	115.4512939	30.08279629	0.509718101	357.8221071	13.94	1
-0.040838237	0.162836358	-28.75011898	-1.434448242	-0.068317587	0.330026845	-48.09558105	159.3779297	41.2328531	0.491259957	345.8470097	17.29	1
0.060824877	0.205650705	42.75988844	-0.905273438	0.071327264	0.341962184	50.14306641	145.3085938	36.89652165	0.501319969	352.4279379	19.38	1
-0.111289912	0.273743787	-78.79325797	-2.094665527	-0.315247013	0.666024187	-223.1948853	86.33441162	25.58876241	0.510157194	361.191293	0.53	1
-0.149085336	0.200168255	-105.2542472	-1.649658203	-0.326992478	0.410030161	-230.8566895	110.0968018	33.26785599	0.436963043	308.4959082	2.17	1
-0.168372985	0.187983978	-118.3662084	-1.425415039	-0.286849433	0.434350681	-201.6551514	117.9715576	34.23113147	0.465864552	327.5027804	2.22	1
-0.179745996	0.24901162	-127.2601652	-1.190185547	-0.210168698	0.351623417	-148.7994385	109.6386719	29.67778526	0.522929547	370.2341196	12.94	1
-0.086807298	0.12010309	-61.19914529	-0.824829102	-0.14787892	0.279148622	-104.2546387	101.7960205	24.35752262	0.502691172	354.397276	11.45	1
-0.079018682	0.161225696	-55.3130771	-0.869262695	-0.107502093	0.348567541	-75.25146484	108.0369873	27.50832122	0.498121113	348.6847793	10.14	1
-0.235393938	0.20796723	-165.952726	-1.411987305	-0.308899532	0.338683622	-217.7741699	110.1147461	25.77889867	0.54026924	380.8898142	13.84	1
-0.261752041	0.349992291	-185.0586929	-1.70324707	-0.374477359	0.528921773	-264.7554932	105.8829346	25.75213121	0.52827394	373.4896756	12.06	1
-0.181092864	0.267119251	-128.0326547	-1.193481445	-0.276358382	0.466097364	-195.385376	137.5161133	31.84236632	0.508343937	359.3991638	14.41	1
-0.202361495	0.369427742	-141.4506853	-1.589111328	-0.237835056	0.526450932	-166.2467041	120.6312256	29.54408754	0.530368519	370.7275951	14.38	1
-0.243623569	0.301281794	-172.4854867	-1.745239258	-0.249924137	0.482387732	-176.9462891	130.1401367	34.86366212	0.529654998	374.9957387	12.55	1
0.043448846	0.147576339	30.71833435	-0.920776367	0.066854647	0.376264833	47.26623535	147.3275146	37.17390031	0.516984578	365.508097	18.00	1
-0.241748936	0.267814871	-170.191251	-1.359863281	-0.285317681	0.442812589	-200.8636475	125.803833	29.85888393	0.541048568	380.8981922	15.30	1
-0.05023494	0.138037531	-35.51610223	-0.979858398	-0.077547972	0.366168924	-54.82641602	136.4509277	30.28174877	0.505896452	357.6687918	15.94	1
0.059262345	0.099293413	41.7799534	-0.534912109	0.229685769	0.350218618	161.9284668	133.3358154	38.05971364	0.591530799	417.0292134	2.91	1
-0.144201286	0.196266572	-101.8061081	-1.444580078	-0.16261218	0.311094528	-114.8041992	83.16516113	19.06516608	0.522284154	368.7326129	9.74	1
-0.032858501	0.206740852	-23.23096015	-0.881835938	0.036529239	0.336674756	25.82617188	140.3182373	35.79918303	0.526881879	372.5054887	14.75	1
-0.122976565	0.236554161	-86.82145483	-1.60559082	-0.286550549	0.45930653	-202.3046875	121.9626465	33.69524969	0.473739356	334.4599857	3.68	1
-0.003199965	0.108871602	-2.262375508	-0.643310547	-0.014067783	0.249684003	-9.945922852	131.6948242	32.9737305	0.502738283	355.4359661	19.26	1
-0.234356675	0.251521432	-164.0496726	-1.424316406	-0.281227504	0.365827087	-196.8592529	106.6894531	23.68793679	0.532216291	372.5514039	11.63	1
-0.188938212	0.212522283	-132.8235628	-1.471923828	-0.249283553	0.366794672	-175.2463379	105.1240234	23.20520021	0.535470016	376.4354215	10.89	1
-0.223711312	0.202888443	-158.1638978	-1.208740234	-0.254759188	0.287194274	-180.1147461	91.78735352	22.38072057	0.523552923	370.1519169	13.05	1
-0.137023043	0.290687205	-97.01231478	-1.302734375	-0.131881455	0.422046902	-93.37207031	106.0787354	24.96859666	0.524559294	371.3879801	10.52	1
-0.001182737	0.141622154	-0.833829335	-1.145019531	-0.005740595	0.325805449	-4.047119141	123.6722412	29.08699172	0.510968135	360.2325355	15.73	1
-0.105702583	0.186654961	-74.7317261	-0.884887695	-0.162783438	0.307523333	-115.0878906	81.84228516	19.55688318	0.511758484	361.8132485	8.64	1
-0.194628775	0.313634001	-137.7971727	-1.642578125	-0.169012555	0.413541161	-119.6608887	108.6341553	27.05809354	0.552787642	391.3736508	15.97	1
-0.186607443	0.209905049	-131.3716398	-1.489379883	-0.203305851	0.39986066	-143.1273193	116.3560791	27.13703897	0.542853722	382.1690205	13.87	1
-0.135270027	0.263717834	-94.9595591	-1.296386719	0.010242951	0.417905855	7.190551758	115.508667	28.51352221	0.611867124	429.5307207	3.68	1
0.019857346	0.142478717	13.97957181	-0.90020752	-0.085079973	0.315397577	-59.89630127	85.96496582	22.47199456	0.421875208	297.0001464	0.32	1
-0.013894633	0.154600634	-9.781821886	-1.450256348	-0.101995642	0.454048949	-71.80493164	94.012146	26.64924927	0.464473643	326.9894446	0.58	1
0.081867214	0.1906651	57.88012005	-0.807312012	0.063114927	0.347907805	44.62225342	88.02209473	22.71905636	0.462274595	326.8281386	8.09	1
0.067390773	0.190269407	47.57788609	-0.528320313	0.175463279	0.345138138	123.8770752	127.0806885	30.19028238	0.538349443	380.0747066	11.74	1
-0.128350875	0.136922972	-90.87241934	-0.794067383	-0.117552332	0.292898395	-83.22705078	120.1591797	30.77373676	0.528809424	374.3970722	13.77	1
0.016305016	0.245541585	11.46242622	-1.165893555	0.030421467	0.354354956	21.3862915	84.53411865	20.99230203	0.517497764	363.8009279	12.63	1
0.024322112	0.127279294	17.12276717	-1.051574707	0.05484555	0.375519344	38.61126709	117.8051147	31.21115593	0.509860299	358.9416507	12.22	1
-0.006012662	0.205186155	-4.256964798	-1.436340332	-0.021782654	0.384145229	-15.42211914	109.7961426	28.39163257	0.495392453	350.7378565	13.24	1
-0.104766393	0.162232764	-74.17460597	-1.183959961	-0.081286931	0.336706585	-57.55114746	147.6654053	36.55301425	0.538899663	381.5409615	19.78	1
-0.003591414	0.184214316	-2.53912945	-1.29901123	-0.045565982	0.370588818	-32.21514893	104.4645386	26.85233717	0.472844904	334.3013475	14.16	1
-0.163814398	0.213634498	-115.816779	-0.937133789	-0.191151922	0.275904363	-135.1444092	137.1685791	35.00470964	0.508922286	359.8080561	19.56	1
0.038923586	0.142119573	27.44112813	-1.434387207	0.050249768	0.472958645	35.42608643	115.9943848	30.00804512	0.509413212	359.1363142	11.91	1
0.058476814	0.252232191	40.99224677	-0.847290039	0.178290047	0.34725786	124.9813232	101.3776245	23.40102977	0.534420819	374.6289944	12.36	1
-0.093486232	0.169919186	-66.0012795	-0.795654297	-0.049721175	0.244968906	-35.10314941	105.7510986	26.65771763	0.531527507	375.2584201	14.47	1
0.016475288	0.110472034	11.63155309	-0.454956055	0.218490644	0.259500176	154.2543945	100.0288086	26.44705107	0.629269454	444.2642348	0.09	1
0.060448704	0.145660716	42.4954387	-0.851074219	0.111474332	0.316541627	78.36645508	155.5389404	40.52562526	0.530111076	372.6680867	19.88	1
-0.184680438	0.317056765	-130.7537502	-1.722412109	-0.19633596	0.435186605	-139.0058594	136.2758789	32.79495509	0.547251962	387.4543893	16.02	1
0.026072024	0.192033866	18.43292107	-0.727050781	0.194314528	0.360753541	137.3803711	147.0073242	41.01829771	0.579259281	409.5363119	4.44	1
-0.120045097	0.22110524	-84.27165783	-1.174194336	-0.157090755	0.405548726	-110.27771	130.9846191	30.96498192	0.518775919	364.1806952	15.76	1
-0.138134324	0.207528563	-96.83216078	-1.202758789	-0.080501279	0.30103894	-56.43139648	122.651123	31.11806202	0.543469808	380.9723353	14.53	1
-0.098512239	0.265281271	-69.64815285	-1.371582031	0.012704118	0.402739155	8.981811523	113.1412354	29.70468951	0.569751253	402.814136	1.94	1
0.063275753	0.123555828	44.35630251	-1.457397461	0.080507374	0.308762823	56.43566895	129.1154785	32.80090356	0.501537282	351.5776345	15.12	1
-0.049385259	0.236213323	-34.86599266	-1.618896484	-0.062288365	0.487479862	-43.97558594	117.222168	31.80158157	0.529341707	373.7152448	3.02	1
-0.041194932	0.147147736	-29.08362205	-0.678466797	0.155593137	0.333079192	109.8487549	120.8369141	32.49670515	0.603016264	425.7294821	2.65	1
-0.022886697	0.220319119	-16.08934818	-0.852661133	0.060868807	0.370754056	42.79077148	75.11938477	20.04938899	0.564244446	396.6638457	0.24	1
-0.219117463	0.228691322	-154.4778118	-1.409912109	-0.273028867	0.316667002	-192.4853516	131.2915039	32.63552851	0.520583291	367.0112201	18.23	1
-0.08812093	0.272135693	-62.65398158	-1.016845703	-0.086943593	0.361612158	-61.81689453	134.7335205	36.53606791	0.526313924	374.2092	19.21	1
0.017901824	0.127371999	12.5491784	-0.685913086	0.086900132	0.311739196	60.91699219	109.0223389	29.13263284	0.528327747	370.3577509	10.54	1
-0.118100561	0.142922686	-83.02469428	-0.998901367	-0.101183787	0.293134158	-71.13220215	83.72277832	20.14419975	0.545032343	383.1577368	9.44	1
-0.079529213	0.1532805	-56.14762452	-1.091186523	-0.043274099	0.340957185	-30.55151367	99.43444824	23.45376908	0.544369683	384.3249959	7.12	1
-7.42318E-05	0.15988811	-0.051888044	-1.812316895	-0.007208872	0.442340537	-5.039001465	118.2564087	29.5748016	0.504274345	352.4877672	12.73	1
-0.04592718	0.237308455	-32.33273452	-1.825134277	-0.050960367	0.615726682	-35.87609863	105.7095337	28.45818691	0.539397237	379.7356548	1.15	1
0.06605089	0.141360118	46.76403008	-1.140014648	-0.018021751	0.384597173	-12.75939941	103.3962402	27.18071257	0.46029769	325.8907644	10.04	1
-0.048073288	0.234482822	-33.89166775	-1.016235352	-0.058792352	0.310975054	-41.4486084	101.0571289	25.24585179	0.506565684	357.1288073	13.85	1
0.048499914	0.16448761	34.14393975	-1.062316895	0.019336267	0.380182101	13.61273193	120.3164673	30.28885579	0.473723206	333.5011372	12.62	1
-0.225924888	0.154725736	-159.7288958	-1.399536133	-0.304877426	0.241581529	-215.5483398	96.89782715	22.1599202	0.515910776	364.7489187	11.76	1
-0.149530064	0.23870319	-105.7177552	-1.282226563	-0.284169846	0.354443576	-200.9080811	104.0860596	23.23029338	0.493979209	349.2433005	13.66	1
-0.063218025	0.138145343	-44.69514375	-1.036621094	-0.155033095	0.223852558	-109.6083984	120.1741943	29.39946074	0.484244521	342.3608763	15.31	1
0.029774527	0.195704896	20.93149226	-0.941772461	-0.017296825	0.300002604	-12.15966797	102.9390259	27.49746452	0.472404259	332.1001944	12.58	1
0.02889139	0.14096312	20.39732102	-1.299377441	-0.138096969	0.384827606	-97.49645996	112.6901245	29.3079824	0.440008139	310.6457464	4.94	1
0.006594744	0.159237856	4.662483834	-1.045166016	-0.042606338	0.308386516	-30.12268066	86.02166748	22.68374998	0.484069956	342.2374592	5.02	1
-0.08545244	0.163543438	-60.4148751	-1.030151367	-0.187675767	0.270363186	-132.6867676	124.1778564	34.91565807	0.479055265	338.6920722	8.26	1
-0.100301014	0.171521157	-70.61191385	-1.180541992	-0.160348372	0.336813069	-112.8852539	124.0187988	31.29318458	0.511043953	359.7749429	14.96	1
-0.133661439	0.191061948	-94.36497572	-1.117431641	-0.154086018	0.28963497	-108.784729	104.7168579	27.21440157	0.518251577	365.8856133	11.14	1
-0.106026119	0.264513445	-74.74841408	-1.248535156	-0.140581713	0.368889733	-99.11010742	102.0557861	27.44730305	0.482840024	340.4022169	10.89	1
-0.148777678	0.330828588	-105.1858181	-1.357421875	-0.235179248	0.464219304	-166.2717285	101.6759644	22.64779053	0.521266996	368.5357659	9.45	1
-0.148203452	0.162080881	-104.4834338	-0.950683594	-0.20228436	0.300573521	-142.6104736	97.99719238	24.11781177	0.526613368	371.2624244	10.73	1
-0.05887973	0.149485468	-41.6279688	-2.89453125	0.161827249	0.712002459	114.4118652	139.9189453	39.62249127	0.635118055	449.0284649	0.33	1
-0.169817936	0.168127623	-120.4009167	-1.963500977	-0.032758231	0.599865945	-23.22558594	133.6948242	38.08909206	0.58293921	413.3038997	4.75	1
-0.086067036	0.117050155	-60.8493947	-1.558105469	-0.002730956	0.506211793	-1.930786133	153.1741943	40.84377586	0.557140873	393.8985974	13.07	1
-0.055139187	0.123593048	-38.70770918	-0.848876953	-0.106571034	0.277602362	-74.81286621	129.6890869	31.81863307	0.482005979	338.368197	11.49	1
-0.002195985	0.229464175	-1.543777706	-1.053222656	0.009650327	0.387284862	6.784179688	114.0328369	28.86143287	0.512885302	360.5583675	13.05	1
0.023917966	0.200870248	16.81433035	-1.193115234	0.036738128	0.335252952	25.8269043	135.1104736	34.50303595	0.50053255	351.8743824	14.42	1
-0.03793763	0.192088152	-26.78396673	-0.917602539	-0.054965703	0.313396723	-38.80578613	120.7913818	30.27773293	0.504656955	356.28781	16.04	1
-0.1703451	0.206912927	-120.2636407	-1.125732422	-0.161126761	0.325040488	-113.7554932	117.4362793	30.26107429	0.53128151	375.0847462	14.26	1
-0.089465529	0.277163902	-62.53640476	-1.141967773	-0.091527761	0.422559127	-63.97790527	121.3640137	30.04070886	0.541251	378.3344487	15.61	1
-0.110289134	0.305436376	-77.53326094	-1.127319336	-0.11299422	0.443418587	-79.43493652	119.8046875	31.06409924	0.547362801	384.7960488	13.41	1
-0.066943574	0.291342798	-47.2621632	-0.976074219	-0.044112511	0.451954634	-31.14343262	129.1397705	35.20857295	0.5347661	377.5448667	12.19	1
-0.027641894	0.117596677	-19.51517728	-0.698120117	0.035999503	0.234031452	25.41564941	95.76379395	25.32707527	0.539872017	381.1496438	8.06	1
-0.038990187	0.204042732	-27.5660619	-0.919799805	-0.072091757	0.302447129	-50.96887207	128.2854004	32.35721249	0.504205502	356.4732898	15.59	1
0.088457512	0.126504489	62.53946067	-0.867919922	0.006459022	0.250236272	4.56652832	158.0603027	40.6824754	0.460177524	325.3455097	19.62	1
-0.070031236	0.139156056	-49.37202145	-1.007080078	-0.144982997	0.265750173	-102.2130127	130.5869141	34.87285785	0.492559682	347.2545757	12.34	1
0.001045629	0.155849973	0.739259809	-0.843505859	-0.027651775	0.279939717	-19.54980469	136.4587402	35.55748763	0.485544573	343.2800134	19.20	1
0.073716561	0.109234043	52.04389195	-0.55065918	0.189388286	0.342243747	133.7081299	144.2764893	40.3095347	0.545182952	384.8991639	2.39	1
-0.0337059	0.219902302	-23.66154182	-1.327392578	-0.101343921	0.384784592	-71.14343262	130.7669678	32.201977	0.481309554	337.8793072	11.97	1
-0.105173641	0.178748036	-74.04224355	-1.025146484	-0.195976257	0.289807538	-137.9672852	105.6364746	26.60615277	0.471746415	332.1094764	6.48	1
-0.095601899	0.148909911	-67.49494099	-1.602539063	-0.243049254	0.328892768	-171.5927734	97.51379395	27.57580376	0.44212906	312.1431164	0.35	1
-0.094852437	0.226789629	-67.06067326	-1.178955078	-0.314331055	0.395086637	-222.2320557	94.26818848	29.04209383	0.416610743	294.5437951	0.34	1
-0.018170051	0.242021638	-12.71903536	-1.9140625	-0.116197248	0.630846317	-81.33807373	88.48901367	29.77140002	0.47106574	329.746018	0.24	1
-0.133740794	0.112323004	-93.88603752	-1.261108398	-0.322089301	0.283288068	-226.1066895	108.6040039	31.15666977	0.421473176	295.8741692	1.14	1
0.017550792	0.26514661	12.33820703	-2.158996582	-0.194040746	0.764158992	-136.4106445	116.2362671	35.29379678	0.47518133	334.052475	0.94	1
0.002949275	0.103260145	2.08218822	-1.08972168	-0.100118578	0.31212894	-70.68371582	128.4053955	36.39798043	0.443246423	312.9319747	3.97	1
-0.040388285	0.248491688	-28.35257631	-2.118286133	-0.202925288	0.693097034	-142.4535522	117.0108643	36.32329966	0.478962073	336.2313753	0.42	1
0.011044598	0.212855225	7.797485888	-1.116333008	0.005503711	0.276979787	3.885620117	107.2225342	28.56630176	0.499521247	352.6620002	13.32	1
-0.157261589	0.238385121	-110.8694204	-1.296569824	-0.098405381	0.335894208	-69.37579346	134.0546265	33.15595803	0.536052156	377.91677	16.43	1
-0.021570325	0.245086042	-15.22864945	-1.423461914	0.073427714	0.525141146	51.83996582	127.7041626	34.58602731	0.507058324	357.9831766	3.89	1
-0.158396553	0.276074135	-112.3031564	-1.773071289	-0.324777622	0.516416417	-230.267334	116.1314697	29.89058347	0.497012562	352.3819062	5.89	1
0.043858871	0.213033394	30.87664494	-2.015869141	-0.120276451	0.688485665	-84.67462158	99.68395996	29.96942334	0.466140787	328.1631139	0.62	1
-0.255742533	0.148744514	-180.0427429	-1.890258789	-0.401170731	0.399446929	-282.4241943	134.9897461	37.73401275	0.464716863	327.1606719	3.51	1
-0.15698877	0.191105814	-110.520094	-1.652954102	-0.286058773	0.416859431	-201.385376	112.4549561	31.09036043	0.454504281	319.9710138	5.98	1
-0.218420802	0.308902733	-153.9866657	-1.98059082	-0.231714733	0.461063559	-163.3588867	87.16430664	19.67304109	0.560744695	395.3250097	10.67	1
-0.205206353	0.211275009	-144.2600661	-0.949584961	-0.230283127	0.314445502	-161.8890381	108.2879639	27.69712374	0.536542144	377.1891274	12.12	1
-0.108572645	0.195081552	-76.4351418	-0.852416992	-0.136293064	0.247226549	-95.95031738	83.33276367	20.80906738	0.51141111	360.0334212	11.78	1
-0.179727096	0.192885375	-127.0670567	-0.994873047	-0.17370053	0.379925393	-122.8062744	113.0006104	26.46029308	0.520303213	367.8543714	9.83	1
-0.236103537	0.229439636	-166.6890968	-1.545349121	-0.387186023	0.343586223	-273.3533325	104.0400391	24.00365888	0.494434168	349.0705225	9.02	1
-0.153651418	0.195148946	-108.1705984	-1.07800293	-0.106517445	0.284532576	-74.98828125	95.33178711	22.41855714	0.566998704	399.1670876	8.13	1
0.067041069	0.21291777	47.39803563	-1.022094727	-0.090359916	0.367610621	-63.88446045	107.2261963	27.60049124	0.409689663	289.6505919	0.86	1
0.021105082	0.120612531	14.92129276	-0.981323242	-0.086786899	0.30376475	-61.3583374	85.07427979	22.093198	0.401803437	284.0750301	2.86	1
-0.217524869	0.316604112	-153.7900821	-1.242797852	-0.158025804	0.419811792	-111.7242432	101.7587891	25.10822552	0.591231502	418.0006717	11.31	1
-0.064266664	0.295759281	-45.37226495	-1.076538086	-0.015332619	0.366020945	-10.8248291	100.126709	24.46789643	0.546887237	386.1023894	10.80	1
-0.050693153	0.232908978	-36.04283156	-1.70513916	-0.169059056	0.635151312	-120.2009888	102.6079102	30.91819727	0.49322611	350.6837645	0.06	1
-0.086103991	0.169486826	-60.87552144	-0.975708008	-0.231160079	0.243810285	-163.4301758	84.09765625	21.56865177	0.425135447	300.5707612	4.17	1
-0.149051995	0.354616618	-105.3797602	-1.583984375	-0.239798237	0.56377723	-169.5373535	98.08831787	24.11345259	0.534067175	377.5854924	9.79	1
-0.063492023	0.298669519	-44.8888605	-1.111572266	-0.119163761	0.37495526	-84.2487793	119.0859375	26.22146401	0.487922992	344.9615551	11.60	1
-0.161234318	0.302860417	-114.1538974	-1.517578125	-0.10482995	0.639878497	-74.21960449	100.428833	29.55764542	0.612572932	433.7016356	0.70	1
-0.106678592	0.121115436	-74.99505004	-1.489868164	-0.357489422	0.405679738	-251.3150635	124.3614502	35.36863009	0.356888888	250.8928884	0.53	1
0.021397298	0.261606866	15.08509475	-2.0703125	-0.184604423	0.513064367	-130.1461182	123.0006104	35.05046284	0.359310021	253.3135649	1.37	1
-0.051439233	0.259243773	-36.26465934	-1.142089844	-0.235425151	0.416639477	-165.9747314	97.82019043	25.28396825	0.407275497	287.1292254	4.22	1
0.030999532	0.208965843	21.79267073	-1.827148438	-0.169261515	0.689473861	-118.9908447	87.95788574	28.95439371	0.483955361	340.2206187	0.66	1
-0.158315523	0.116988936	-111.2958129	-1.298828125	-0.334798061	0.350616075	-235.3630371	80.76806641	21.18691449	0.435632948	306.2499624	2.92	1
0.028861059	0.235114718	20.26046311	-1.523376465	-0.085629281	0.554399459	-60.11175537	105.3673706	28.44835195	0.478492268	335.9015725	0.95	1
0.01512082	0.152182689	10.73578192	-1.612426758	-0.063818617	0.470431117	-45.31121826	111.3972168	30.89046141	0.487129669	345.8620652	1.82	1
-0.119107357	0.34638489	-83.37514985	-1.530029297	-0.058568464	0.521532153	-40.9979248	88.65344238	23.39801629	0.588020772	411.6145407	9.42	1
0.052344617	0.141079225	36.79826541	-1.782104492	-0.035015513	0.616392884	-24.61590576	115.3696899	35.68610528	0.465584569	327.3059519	1.74	1
-0.067518311	0.213996314	-47.66792741	-0.925415039	-0.152468241	0.31433465	-107.6425781	105.418457	26.25555308	0.475952794	336.0226726	12.61	1
-0.144460715	0.328110038	-101.5558827	-1.996459961	-0.187222694	0.538386586	-131.6175537	89.8371582	22.42693637	0.542890069	381.6517189	2.05	1
0.054215662	0.213462201	38.16782618	-1.918945313	-0.251820044	0.750694691	-177.281311	106.8193359	31.47421741	0.464751006	327.1847082	0.68	1
-0.033963121	0.280229729	-24.07985306	-1.520019531	0.00232915	0.605526923	1.651367188	87.24279785	27.03622079	0.542343242	384.5213583	0.30	1
-0.06802498	0.227478907	-47.54946122	-0.999755859	-0.182247658	0.398226867	-127.3911133	118.1998291	27.79643106	0.443446427	309.9690527	11.81	1
-0.166923999	0.23332609	-116.8467991	-1.419067383	-0.367118966	0.330382103	-256.9832764	102.5180664	25.97821678	0.405369648	283.7587535	4.78	1
-0.122780081	0.186515518	-86.80551737	-1.94152832	-0.28174726	0.4353861	-199.1953125	91.85498047	24.27973013	0.442473641	312.828864	4.73	1
0.062627587	0.226363072	44.34033182	-1.577392578	-0.042253915	0.593331817	-29.91577148	103.699585	31.18737161	0.485942608	344.0473667	0.56	1
0.021270884	0.177271537	14.95343166	-1.629394531	-0.046993771	0.492709223	-33.03662109	121.8657227	32.40378122	0.500114583	351.5805516	3.56	1
-0.307156655	0.292527659	-216.2382853	-1.727050781	-0.258394762	0.551165271	-181.9099121	104.661499	25.30442897	0.592473105	417.1010662	8.57	1
-0.033594233	0.249946359	-23.48236904	-1.193603516	-0.020011323	0.411617629	-13.98791504	106.8519287	27.30718646	0.517082251	361.4404936	13.20	1
-0.184810172	0.258213552	-130.4759817	-1.459472656	-0.294195159	0.419526451	-207.7017822	105.5358887	26.35281716	0.463519993	327.2451154	3.57	1
-0.030108332	0.246821252	-21.28659084	-1.646240234	-0.088081759	0.577129972	-62.27380371	99.11499023	30.35207988	0.512435938	362.2922082	3.61	1
-0.04567072	0.295091657	-32.15218715	-1.941650391	-0.219236894	0.76720488	-154.3427734	96.7611084	30.02559812	0.503539782	354.4920065	0.19	1
-0.145641445	0.195397043	-102.5315771	-1.053344727	-0.176885085	0.389225152	-124.5270996	90.03533936	22.23428852	0.515063591	362.6047684	8.28	1
-0.024092385	0.322463032	-16.98513126	-1.097229004	-0.073701899	0.431209884	-51.95983887	90.05322266	22.72845319	0.488495289	344.3891788	10.56	1
-0.273234783	0.349163667	-192.6305221	-1.312866211	-0.349183514	0.491641257	-246.1743774	123.0126953	32.18039067	0.511171796	360.3761163	14.62	1
0.007468861	0.143465624	5.273016169	-1.096679688	-0.039395946	0.324349186	-27.8135376	112.0866699	27.76365265	0.454854698	321.1274169	14.24	1
-0.124491738	0.206657153	-87.64218348	-1.054931641	-0.187042236	0.315852702	-131.6777344	101.072876	26.29000955	0.499507869	351.6535395	10.96	1
-0.066376866	0.204324351	-46.9284444	-1.284545898	-0.339529078	0.290434919	-240.0470581	103.8314209	24.65026417	0.401223831	283.6652483	0.83	1
0.012676259	0.158550792	8.962115007	-1.026428223	-0.057320645	0.279178955	-40.5256958	114.1709595	30.68535245	0.452659199	320.0300534	10.91	1
-0.056711691	0.115997712	-39.81160676	-0.924560547	-0.063073661	0.322037922	-44.27770996	118.8045044	32.18557003	0.509418046	357.611468	10.50	1
-0.123752431	0.169376211	-86.62670203	-0.860229492	-0.147669155	0.244338404	-103.3684082	99.98815918	25.98445442	0.518467096	362.9269673	12.26	1
-0.135071407	0.278116369	-94.41491377	-1.472045898	-0.260268576	0.425583001	-181.9277344	115.7542725	29.28779785	0.474294009	331.5315125	2.59	1
-0.02706321	0.350884838	-18.97131045	-1.085876465	0.012178647	0.449223544	8.537231445	129.9782104	35.18884994	0.538536403	377.5140184	14.73	1
-0.146313946	0.23269687	-103.44396	-1.14831543	-0.104500907	0.361752942	-73.88214111	132.6913452	35.02380846	0.551843207	390.1531473	16.42	1
-0.32649186	0.346576304	-229.8502696	-1.795166016	-0.28946339	0.611576849	-203.7822266	156.7283936	42.21798143	0.559960148	394.211944	15.38	1
0.012587139	0.261992911	8.848758578	-0.923950195	0.038366196	0.352786819	26.97143555	91.58752441	20.51547785	0.533249485	374.8743881	4.30	1
-0.069875105	0.233051297	-49.19207401	-1.577392578	-0.296487895	0.458724905	-208.727478	117.1414795	31.18412476	0.437207586	307.7941404	2.33	1
0.134469223	0.263682357	93.85951777	-0.822875977	0.18621284	0.409619648	129.9765625	107.557251	31.14888277	0.508790612	355.1358469	12.36	1
0.043582526	0.209749242	30.68209801	-0.792114258	0.091343533	0.354288365	64.30584717	130.7947388	36.65620508	0.520901899	366.7149369	13.01	1
0.007209821	0.205806803	5.111763215	-1.606018066	-0.041422813	0.533707596	-29.36877441	119.3809814	36.21928434	0.473826935	335.943297	0.78	1
-0.128102875	0.158827727	-89.92821847	-0.88269043	-0.123154512	0.347407086	-86.45446777	126.0970459	31.44139954	0.525285237	368.7502363	15.25	1
-0.023202675	0.132361472	-16.31148082	-0.827880859	-0.111902012	0.280804714	-78.66711426	118.0200195	29.60222616	0.471237328	331.2798412	12.44	1
-0.117820064	0.147932228	-83.41660536	-1.42199707	-0.205512785	0.377023619	-145.5030518	115.9276123	25.59317536	0.512214392	362.6477893	12.03	1
-0.074366652	0.140970981	-52.50285632	-1.010253906	-0.102108358	0.391283609	-72.08850098	117.644043	26.45932856	0.504323994	356.0527399	12.97	1
-0.084315132	0.196373222	-59.02059241	-0.928100586	-0.09743321	0.345921559	-68.20324707	123.6855469	29.69201037	0.509267486	356.48724	12.60	1
0.005928591	0.086813422	4.161870813	-1.239807129	-0.103991995	0.451736707	-73.00238037	118.4085693	31.66978057	0.446497762	313.441429	5.15	1
-0.076177029	0.122365192	-53.93333635	-1.319458008	-0.112349516	0.321986999	-79.54345703	125.6688232	33.95516916	0.492443878	348.6502657	9.83	1
-6.45278E-05	0.204567753	-0.045363075	-1.372253418	-0.260539895	0.442552194	-183.1595459	89.67010498	24.66256041	0.39264489	276.0293578	1.32	1
-0.011649097	0.161129479	-8.247560858	-1.927124023	-0.216875066	0.577730522	-153.5475464	107.0935059	30.48058735	0.466208957	330.0759413	0.54	1
-0.031226568	0.11159855	-22.1084099	-0.805297852	-0.044857047	0.310773334	-31.75878906	136.3652954	35.34982965	0.502606181	355.8451762	16.75	1
-0.021602338	0.242157984	-15.2728531	-1.319030762	-0.065601138	0.368847804	-46.38000488	120.7415771	27.58076846	0.494951514	349.9307205	13.71	1
0.022763772	0.10690423	16.07122273	-0.886657715	0.044219452	0.314738512	31.21893311	125.9400635	33.34113871	0.49005067	345.9757733	15.74	1
-0.121544402	0.172940376	-85.68880356	-0.993530273	-0.118046321	0.312410128	-83.22265625	134.0012207	34.74314566	0.514157042	362.4807149	14.20	1
-0.148189373	0.122243884	-104.7698868	-0.761230469	-0.154221941	0.205879299	-109.0349121	80.13690186	22.01888748	0.530616812	375.1460864	9.11	1
-0.083954535	0.192197145	-59.60771968	-0.910888672	-0.075123446	0.311844651	-53.33764648	95.80847168	27.16687177	0.529220787	375.7467585	14.40	1
-0.128524111	0.143050715	-90.22392579	-1.09765625	-0.138910973	0.393345117	-97.51550293	116.3349609	27.23774103	0.53382448	374.7447853	13.97	1
-0.094346343	0.159002805	-66.70286431	-1.220336914	-0.107572607	0.286402132	-76.05383301	89.38952637	20.83305085	0.514341587	363.6395021	11.49	1
-0.08943421	0.2012521	-63.05111831	-1.088256836	0.003185775	0.316492987	2.24597168	125.3532715	30.31354659	0.548546764	386.7254688	12.07	1
-0.120053415	0.232249435	-84.75771072	-1.246459961	-0.135489402	0.424735123	-95.65551758	113.555542	27.49400754	0.533482514	376.6386546	10.78	1
-0.070715634	0.188817898	-49.50094366	-1.128540039	-0.090829032	0.350932156	-63.58032227	125.9351807	30.23133673	0.52147877	365.035139	17.54	1
-0.123848098	0.200924047	-87.43675747	-1.583129883	-0.185533043	0.346650407	-130.9863281	122.0263672	27.65594852	0.515571133	363.9932198	11.81	1
-0.076926079	0.217497044	-54.30981173	-1.944213867	-0.058346151	0.497336708	-41.19238281	122.1916504	31.41575567	0.547449621	386.4994324	3.79	1
0.077134773	0.164899726	54.53428468	-0.94543457	0.186523265	0.417561892	131.8719482	131.9882813	35.46200287	0.541682533	382.9695511	5.17	1
-0.001517923	0.124154687	-1.074689628	-1.08972168	-0.096355029	0.360204926	-68.21936035	130.7978516	33.1846812	0.462959769	327.7755164	11.98	1
-0.074789668	0.228657151	-52.72671592	-1.385375977	0.005467538	0.442873139	3.854614258	123.6158447	32.72532338	0.525447137	370.4402314	6.17	1
-0.089151608	0.22227867	-63.03018716	-1.583007813	0.000695473	0.502996092	0.491699219	122.5330811	31.15700681	0.57589532	407.1579915	3.54	1
-0.027255587	0.229763398	-19.24244448	-1.087768555	0.054693552	0.393129723	38.61364746	64.94030762	16.73305926	0.581888647	410.8133848	4.21	1
0.012730025	0.174215146	8.949207437	-0.824584961	0.004208561	0.36131512	2.958618164	106.1781006	26.87181375	0.513569701	361.0394997	13.69	1
-0.03857106	0.285366846	-27.11545512	-2.149902344	-0.131568876	0.5713024	-92.49291992	117.5764771	33.75295389	0.513581518	361.0478074	1.51	1
-0.017035757	0.2355187	-12.04427994	-2.600158691	-0.024775698	0.637378853	-17.51641846	126.3326416	38.2208738	0.520670943	368.1143567	1.26	1
-0.158040977	0.246185145	-110.9447658	-1.277832031	-0.115923238	0.329010807	-81.37811279	101.4732056	24.26638845	0.539803395	378.9419832	12.92	1
-0.042554973	0.311620783	-29.95870126	-1.070617676	-0.005879315	0.409430361	-4.139038086	111.2761841	29.21105228	0.548430548	386.0951056	13.30	1
-0.03855165	0.274834907	-27.25601668	-2.101074219	-0.155261697	0.587604933	-109.7700195	88.98400879	24.99213972	0.473472029	334.7447248	0.37	1
-0.08738013	0.163952186	-61.95251248	-1.171386719	-0.119904382	0.380776526	-85.01220703	92.62866211	25.7895679	0.493197867	349.6772875	1.47	1
-0.213107462	0.260472511	-150.8800829	-1.845336914	-0.160829533	0.401201995	-113.8673096	97.75769043	22.75163801	0.565477255	400.3578968	9.89	1
-0.199377215	0.251230614	-140.7603136	-1.18359375	-0.206840277	0.450153046	-146.0292358	94.41040039	24.78767819	0.549611277	388.0255613	6.72	1
-0.039698325	0.090260923	-27.94762075	-0.997436523	-0.052236037	0.375302049	-36.77416992	117.0640869	35.58971601	0.476104591	335.1776319	5.12	1
-0.063151877	0.268354811	-44.64837674	-1.127197266	-0.003207842	0.362552403	-2.267944336	143.3403931	37.67956254	0.532485641	376.4673481	15.11	1
-0.057206372	0.192607177	-40.15887343	-0.844238281	0.016685551	0.259477895	11.71325684	114.421875	28.62893395	0.538196675	377.8140659	15.49	1
0.001863896	0.11653225	1.314046585	-0.584960938	0.055163747	0.223202926	38.89044189	150.0335083	38.75132351	0.514368616	362.6298744	21.96	1
-0.048667703	0.17618035	-34.11605975	-0.872436523	-0.021510234	0.27363927	-15.07867432	141.435791	37.60899769	0.520716051	365.021952	21.08	1
-0.179022943	0.180120534	-126.0321521	-1.118041992	-0.116008152	0.30645847	-81.66973877	129.3236084	31.65982461	0.552003585	388.6105241	14.84	1
-0.03680466	0.213270598	-25.83687153	-0.830566406	0.024602906	0.323972428	17.27124023	117.6220703	30.16712595	0.537261322	377.1574481	18.14	1
-0.082223101	0.096608734	-57.88506341	-0.986694336	-0.073902477	0.243919276	-52.02734375	101.6413574	24.14374841	0.532974741	375.2142175	9.29	1
-0.169204094	0.205220918	-119.2888863	-0.948486328	-0.056907102	0.325335565	-40.11950684	122.737915	28.87891019	0.571895159	403.186087	11.87	1
-0.111427526	0.221481351	-78.89068824	-0.881835938	-0.066112023	0.348717175	-46.80731201	167.0975342	45.10444714	0.524863858	371.6036117	21.69	1
-0.245522553	0.270420813	-173.5844452	-1.239624023	-0.208185479	0.399238949	-147.1871338	152.7487793	37.49339207	0.556856167	393.6973102	19.75	1
-0.044656055	0.227847424	-31.3038945	-0.934814453	-0.057507481	0.33592057	-40.31274414	133.755127	35.14080711	0.509135506	356.9039897	14.66	1
0.072047103	0.127387083	50.72116043	-0.73236084	-0.065321922	0.281714864	-45.9866333	101.9740601	27.85891128	0.383814446	270.20537	0.62	1
0.004256146	0.249037306	3.00909512	-1.031738281	0.023998816	0.430694966	16.96716309	102.1794434	26.80043435	0.498429172	352.3894243	8.90	1
-0.029228954	0.259815494	-20.66487019	-1.132141113	-0.08534217	0.482232381	-60.33691406	101.3630981	28.81295191	0.481283455	340.267403	1.74	1
-0.285035923	0.190837642	-201.5203973	-1.541625977	-0.282511796	0.326771852	-199.7358398	102.772583	24.32911122	0.562305791	397.5501945	14.63	1
-0.162913053	0.200690606	-114.3649635	-1.01574707	-0.133631519	0.333742635	-93.80932617	130.9454346	32.71801431	0.554796407	389.4670775	18.28	1
-0.144343982	0.207762823	-101.6181637	-1.415283203	-0.207756216	0.412620605	-146.260376	118.6160889	33.80661432	0.512573836	360.8519804	5.53	1
-0.065918295	0.116382425	-46.40647962	-0.857666016	-0.083092603	0.264624635	-58.49719238	122.4290771	32.44723983	0.490480693	345.2984076	17.13	1
-0.078176396	0.227959777	-54.64530052	-1.212280273	-0.109729423	0.341741844	-76.7008667	119.9433594	30.78469977	0.493734977	345.1207488	16.21	1
-0.056384648	0.220703718	-39.69479186	-0.998779297	-0.12760067	0.446743523	-89.83087158	124.8271484	28.75057509	0.497920015	350.5356902	13.35	1
-0.089757984	0.286616995	-63.45889493	-1.243286133	-0.226060751	0.469492946	-159.8249512	125.0371704	32.34445772	0.470946877	332.959442	1.99	1
-0.161707625	0.192180191	-113.3570454	-1.322753906	-0.199378956	0.367789458	-139.7646484	113.6304932	30.057847	0.526124817	368.813497	10.67	1
-0.049565403	0.395148412	-34.99317424	-1.670593262	-0.176469668	0.59132783	-124.5875854	104.5515747	23.24397989	0.467329072	329.9343247	7.46	1
-0.176245843	0.166612473	-123.7245817	-1.222900391	-0.274479967	0.286000581	-192.6849365	112.4505615	29.11700823	0.501271054	351.8922797	12.46	1
-0.20964085	0.253878284	-148.2160812	-1.61730957	-0.205101261	0.500295426	-145.0065918	116.3482666	25.85940214	0.534226026	377.6978007	6.48	1
-0.053999304	0.152821675	-38.12350879	-0.983886719	-0.08512364	0.300021992	-60.09729004	118.369751	26.58466011	0.504709365	356.3248118	13.64	1
-0.181932237	0.191611719	-128.2622269	-1.469970703	-0.244360352	0.393768115	-172.2740479	121.5880127	30.30345055	0.517829969	365.0701282	12.63	1
-0.006072775	0.213021897	-4.293451876	-1.118652344	0.002673115	0.383580912	1.889892578	95.46813965	24.31125131	0.492679643	348.3245079	10.31	1
-0.034108342	0.195563907	-23.80762257	-1.353515625	-0.160713961	0.335289725	-112.1783447	130.5690918	32.14621254	0.462899765	323.1040363	9.72	1
-0.126200903	0.203725365	-89.35023917	-1.026123047	-0.162765934	0.321203012	-115.2382813	101.9976807	24.33849616	0.508701271	360.1604997	12.24	1
-0.022834644	0.180216123	-16.144093	-0.771606445	-0.025676895	0.285204685	-18.15356445	90.65893555	22.03155965	0.496177666	350.79761	11.54	1
-0.08365023	0.139727183	-58.72246126	-1.068359375	-0.177137587	0.33193586	-124.3505859	117.3800049	29.81990314	0.487529492	342.2457037	10.42	1
-0.034233561	0.21360743	-24.23736113	-1.013671875	-0.090593758	0.338528876	-64.14038086	100.6036377	25.44144958	0.485462442	343.7074088	12.75	1
-0.107514939	0.155542123	-75.9055468	-1.007446289	-0.026509315	0.444074204	-18.71557617	94.53527832	28.69090128	0.55823181	394.1116578	3.49	1
-0.064903696	0.157157547	-45.62729809	-0.5234375	-0.139589399	0.220250959	-98.13134766	118.3182373	29.42921654	0.492367622	346.1344386	14.64	1
0.002687749	0.167767974	1.90023871	-1.005004883	-0.037839034	0.327737228	-26.75219727	109.8497314	26.81525166	0.490420151	346.7270467	13.88	1
-0.045840003	0.259137641	-32.40888184	-1.17565918	-0.01822249	0.39972447	-12.88330078	96.0793457	24.89419681	0.545876167	385.93445	7.66	1
-0.043088674	0.257330765	-30.54987013	-1.366699219	-0.02889623	0.486964522	-20.48742676	113.6534424	29.28952334	0.528044582	374.3836086	9.59	1
-0.124339777	0.266164533	-87.535203	-1.822265625	-0.234513369	0.41089391	-165.0974121	124.4094238	28.84652006	0.492966861	347.0486701	13.42	1
-0.158193886	0.205650061	-111.5266898	-1.158813477	-0.262546577	0.390476038	-185.0953369	121.0588379	29.38584462	0.506997684	357.433367	13.49	1
0.008663194	0.112009139	6.116214639	-0.917480469	-0.103997163	0.301297391	-73.42199707	139.9232178	32.85716355	0.465384516	328.5614681	15.58	1
-0.109742104	0.260183387	-77.58766787	-1.194213867	-0.237186761	0.410850279	-167.69104	124.1292725	29.3621064	0.479671116	339.1274788	11.52	1
-0.124532723	0.161313581	-88.04463548	-0.973510742	-0.107745957	0.300572609	-76.1763916	91.46508789	23.45364384	0.513752371	363.2229263	10.97	1
-0.098917223	0.174947457	-69.93447685	-1.159912109	-0.12523309	0.467989347	-88.53979492	108.7664795	29.17518991	0.519662323	367.4012626	10.14	1
-0.019117065	0.140440624	-13.51576481	-0.982421875	-0.06835713	0.298240764	-48.32849121	129.4136963	32.24258345	0.491135389	347.2327203	18.86	1
-0.075464762	0.170348931	-53.35358703	-0.986938477	-0.080056025	0.316963601	-56.59960938	116.0447998	29.23235282	0.520497877	367.9919993	15.62	1
-0.097701968	0.272657913	-68.87988773	-1.068115234	-0.113606251	0.377869241	-80.09240723	87.81872559	22.89825466	0.504291442	355.5254666	10.25	1
-0.106217286	0.210188808	-74.88318658	-0.933105469	-0.13665936	0.38349224	-96.34484863	118.2573242	30.56314995	0.500535574	352.87758	15.57	1
-0.105525394	0.192777657	-74.60645335	-0.879882813	-0.09420703	0.257171688	-66.60437012	113.8265381	28.86999242	0.516675061	365.289268	16.02	1
-0.125389127	0.246020305	-88.52472349	-1.373657227	-0.284767734	0.402773345	-201.0460205	96.12243652	23.90096746	0.473764322	334.4776112	10.37	1
-0.040728271	0.147476379	-28.63197479	-1.291015625	-0.082104874	0.296857604	-57.71972656	122.4472656	29.51477503	0.484866316	340.8610199	16.75	1
-0.086610903	0.19929572	-61.1472974	-0.975952148	-0.153924612	0.328105369	-108.6707764	115.6013184	29.24794435	0.492776455	347.9001773	15.09	1
0.050281383	0.154735635	35.49865621	-0.916259766	0.039740111	0.282835171	28.05651855	108.1313477	26.12962393	0.481267011	339.7745098	12.59	1
-0.127185131	0.202717434	-89.91988751	-1.15246582	-0.210840465	0.402666891	-149.064209	115.3685303	29.40582897	0.492690883	348.3324546	7.53	1
-0.120446528	0.289496697	-84.31256985	-1.581420898	-0.053322056	0.400842972	-37.32543945	114.5327148	26.35693232	0.555504617	388.8532318	10.69	1
-0.052764608	0.152643583	-37.19904855	-0.668457031	0.002702169	0.263712602	1.905029297	123.3447266	32.86215242	0.549403457	387.3294368	14.16	1
-0.087823577	0.235883835	-61.65215135	-0.937988281	-0.121023499	0.307996253	-84.95849609	81.66296387	21.4724447	0.502880324	353.0219871	10.25	1
-0.206189116	0.358563632	-145.5695156	-1.834899902	-0.232654345	0.544156432	-164.2539673	99.45770264	27.37353054	0.529975324	374.1625786	11.36	1
-0.181577319	0.163710318	-127.648855	-0.989379883	-0.168403723	0.286828522	-118.3878174	105.8419189	25.21821554	0.540891587	380.2467857	11.14	1
-0.202073468	0.274093021	-142.865942	-1.460205078	-0.146691912	0.419023774	-103.7111816	101.7198486	25.75181559	0.550649632	389.3092898	6.64	1
-0.091044594	0.142063533	-64.00434953	-0.724487305	-0.032085218	0.382720681	-22.5559082	123.0031738	35.64593258	0.552277943	388.2513936	6.84	1
-0.02594067	0.141915916	-18.26223184	-0.765258789	-0.102369308	0.250084068	-72.06799316	118.9309082	29.56230022	0.481498499	338.9749435	13.60	1
-0.117251508	0.219427562	-81.9588038	-0.994506836	-0.158332355	0.378686687	-110.6743164	100.3544922	24.10824937	0.504862663	352.8990013	9.36	1
-0.199735991	0.334802819	-141.0136099	-1.477539063	-0.270022471	0.528191275	-190.6358643	83.63964844	19.85182211	0.552227776	389.8728095	9.08	1
-0.175718258	0.262885873	-124.2328088	-1.256958008	-0.176986586	0.366370372	-125.1295166	109.6118164	24.96363252	0.548281859	387.6352742	12.60	1
-0.018784468	0.164792684	-13.26183444	-1.682922363	-0.048981405	0.477595218	-34.58087158	119.7679443	32.260418	0.506188909	357.3693698	7.44	1
-0.136921811	0.257171722	-96.80372025	-1.395874023	-0.182420528	0.383102697	-128.9713135	84.09973145	20.11723205	0.522908858	369.6965625	11.04	1
-0.079921558	0.26147317	-56.50454124	-1.109375	-0.013849024	0.40006458	-9.791259766	104.8112793	27.34149804	0.546319756	386.2480673	13.53	1
-0.198171747	0.337419517	-139.9092532	-1.645141602	-0.171819844	0.456660774	-121.3048096	95.30712891	24.23383738	0.550995193	389.0026065	9.68	1
-0.064757383	0.194238572	-45.7834699	-0.889038086	-0.095606781	0.295510196	-67.59399414	90.40844727	22.81171938	0.498164624	352.2023889	11.38	1
-0.118682314	0.178373926	-83.43366662	-1.209228516	-0.128574247	0.35332601	-90.38769531	86.65429688	21.93325063	0.512596009	360.3549946	6.91	1
0.017220962	0.172983941	12.07189435	-1.288696289	-0.021447806	0.377025027	-15.03491211	83.9354248	23.06952119	0.474858935	332.8761134	1.26	1
-0.174241277	0.187389021	-123.0143414	-1.067016602	-0.243277142	0.329825913	-171.7536621	145.7976074	37.05999196	0.505777145	357.0786642	19.21	1
-0.161034724	0.169208105	-112.8853412	-0.850219727	-0.082780563	0.348471241	-58.0291748	127.5305176	32.21981758	0.562549709	394.347346	9.92	1
-0.082731691	0.244784091	-58.49130548	-1.324401855	-0.091950887	0.415322868	-65.00927734	95.4185791	26.79870104	0.487808233	344.8804211	2.51	1
-0.031665293	0.297848324	-22.35569686	-1.223022461	-0.089960028	0.430254117	-63.51177979	96.03887939	25.1071327	0.468266843	330.5963914	9.70	1
-0.016039798	0.312712663	-11.3240977	-2.153320313	-0.255968823	0.728009565	-180.7139893	99.29119873	27.88284376	0.479892117	338.8038344	0.50	1
-0.030354315	0.228415216	-21.33908324	-0.817016602	0.007800866	0.351982703	5.484008789	129.472168	29.97551109	0.525213484	369.2250791	12.69	1
-0.022681151	0.145724738	-16.01289248	-0.729370117	-0.051008965	0.291896669	-36.0123291	138.6890869	33.7974309	0.501581462	354.1165124	17.67	1
-0.109768765	0.262967971	-77.38697962	-1.108520508	-0.160612845	0.424789261	-113.2320557	154.9997559	36.60562095	0.514559139	362.7641931	20.10	1
-0.201688615	0.231329742	-141.9887849	-1.091674805	-0.130466808	0.474628	-91.84863281	138.4700928	36.34869191	0.560207106	394.3858027	10.00	1
-0.070691235	0.255078166	-49.62524676	-1.07800293	-0.05119302	0.467651765	-35.9375	126.4105225	33.14028297	0.518924624	364.2850861	13.26	1
-0.211161449	0.274727023	-149.0799827	-1.624816895	-0.347820422	0.443202057	-245.5612183	88.64257813	21.69652552	0.516915321	364.9422166	4.53	1
-0.085141778	0.201969578	-60.11009494	-1.456604004	-0.355600676	0.425240865	-251.0540771	84.24224854	22.58234991	0.40303398	284.54199	0.67	1
-0.042572144	0.118099334	-30.05593359	-0.678955078	-0.178938306	0.183588663	-126.3304443	109.548584	28.89719299	0.4163901	293.9714105	6.73	1
-0.11056179	0.235110819	-77.61437644	-1.225830078	-0.111749285	0.438758163	-78.44799805	103.1903076	22.52503226	0.542231214	380.6463122	9.78	1
-0.111564133	0.182861214	-78.54114958	-1.252807617	-0.151257775	0.277988521	-106.4854736	119.4414063	31.19543362	0.510440893	359.3503888	16.64	1
-0.107725937	0.133812835	-76.16223771	-0.854736328	-0.04899077	0.311460331	-34.63647461	149.1177979	37.56237534	0.552872191	390.8806393	17.35	1
-0.184844601	0.137382322	-130.3154435	-1.272827148	-0.265961083	0.317051314	-187.5025635	118.9552002	28.44645105	0.495477264	349.3114712	12.40	1
0.071329202	0.260782324	50.42974607	-0.916992188	0.156030291	0.366930184	110.3134155	118.8754883	28.57442291	0.520856124	368.2452794	8.50	1
0.001084102	0.179874395	0.766459771	-1.048461914	0.006132263	0.318838469	4.335510254	105.0422974	30.06128094	0.474850358	335.7192028	11.97	1
-0.093568242	0.151403555	-66.24631568	-0.721557617	-0.041368732	0.251505855	-29.2890625	122.7374268	32.01350756	0.538256896	381.0858827	15.41	1
-0.105973611	0.170114776	-74.49944842	-1.126831055	-0.144240226	0.353385344	-101.4008789	115.3867188	28.43713001	0.527998519	371.1829586	14.74	1
-0.210295904	0.278449886	-147.2071328	-1.26953125	-0.179298793	0.388887819	-125.5091553	120.0609131	32.06592015	0.545974809	382.1823665	14.81	1
-0.038722707	0.46372206	-27.14461778	-1.34942627	-0.024652544	0.575604606	-17.28143311	103.4272461	26.74663276	0.515661999	361.4790613	11.98	1
-0.125921734	0.226353527	-88.90074403	-1.234313965	-0.217941414	0.306378732	-153.8666382	128.3035278	33.5257205	0.493602755	348.4835449	13.78	1
-0.332816709	0.316325807	-233.6373298	-1.707336426	-0.453907415	0.437713211	-318.6430054	137.6688843	33.69622335	0.510418232	358.3135987	14.70	1
-0.060262811	0.258043427	-42.30449298	-1.014892578	0.00018867	0.356957265	0.132446289	114.5187988	31.65100281	0.561628593	394.263272	11.35	1
-0.06100163	0.310354475	-42.88414577	-1.968505859	-0.296381857	0.72528139	-208.3564453	104.631958	29.45437879	0.485221312	341.1105821	1.44	1
-0.050866498	0.475128159	-35.75914844	-1.604003906	0.011633926	0.617975532	8.178649902	115.3325195	31.5310703	0.524776123	368.9176148	11.11	1
-0.257894644	0.286217176	-182.0736189	-1.477722168	-0.328152232	0.422840213	-231.6754761	128.4367676	32.11603876	0.517870327	365.616451	14.41	1
-0.014615943	0.128281123	-10.27500768	-1.339782715	0.004593525	0.305137571	3.229248047	147.7667236	36.56885993	0.509555592	358.2175809	19.98	1
-0.017415989	0.296645226	-12.19119217	-1.059936523	-0.045068883	0.337317767	-31.54821777	118.1357422	28.51566213	0.495164743	346.6153198	11.23	1
-0.186195899	0.365154469	-131.6405008	-1.414672852	-0.188668128	0.486022112	-133.3883667	117.0698242	30.23465623	0.546124647	386.1101257	15.05	1
-0.228375128	0.309840233	-161.4612157	-2.059082031	-0.222509144	0.49442908	-157.3139648	133.0667725	31.23239467	0.540541618	382.1629241	13.01	1
-0.001613067	0.228823915	-1.138825309	-1.074707031	0.094662242	0.306248538	66.83154297	113.7508545	27.77363422	0.556787405	393.0919079	8.73	1
-0.29878626	0.366190397	-211.241886	-1.815185547	-0.370576117	0.501756753	-261.9973145	116.5091553	29.81318225	0.515580316	364.5152837	8.13	1
-0.071756071	0.264803124	-50.73154231	-1.051757813	-0.086727763	0.381928519	-61.31652832	108.3387451	28.00489077	0.503515418	355.9854004	15.64	1
-0.15073565	0.40347835	-105.514955	-1.583862305	-0.249147426	0.536421573	-174.4031982	127.1711426	32.51648019	0.487269076	341.0883535	11.46	1
-0.115283645	0.247481105	-81.50553709	-1.244628906	-0.034780715	0.35180567	-24.58996582	115.1119385	27.07100475	0.560336963	396.158233	11.24	1
-0.085317172	0.227312928	-60.23392372	-0.918701172	-0.199687752	0.325670026	-140.9795532	140.1774292	34.30775676	0.477287948	336.9652915	16.99	1
-0.18103138	0.089352315	-127.9891857	-0.759277344	-0.246422839	0.145165614	-174.2209473	83.10949707	20.23172685	0.510602463	360.9959417	11.36	1
-0.0453993	0.342141984	-32.09730481	-1.143066406	-0.134511815	0.42403287	-95.09985352	122.5597534	31.37510627	0.465338746	328.9944935	12.39	1
-0.21662971	0.327124011	-153.1572053	-1.625976563	-0.234986301	0.43327282	-166.1353149	117.5177612	28.31752342	0.543833028	384.4899508	14.44	1
-0.130826513	0.250174836	-92.36351821	-1.103149414	-0.137424026	0.343335586	-97.0213623	116.9033203	29.31267427	0.514261243	363.0684375	17.21	1
-0.299275818	0.3055159	-210.9894516	-1.85546875	-0.369617132	0.454443926	-260.5800781	127.5426025	31.12585247	0.521754209	367.836717	10.74	1
0.019673039	0.181688617	13.88916586	-1.473022461	-0.149468873	0.468621167	-105.5250244	98.05175781	27.81358865	0.429707847	303.3737399	1.21	1
-0.209741962	0.23923546	-148.4973089	-1.388671875	-0.314307434	0.356425461	-222.5296631	122.4383545	29.59258981	0.504314094	357.0543788	11.91	1
-0.226160762	0.548770048	-158.3125332	-2.053466797	-0.210385829	0.710171754	-147.2700806	111.3230591	28.93328587	0.559332553	391.5327868	13.78	1
-0.131165394	0.108683392	-91.94694086	-0.967407227	-0.196839511	0.292907188	-137.9844971	92.53845215	24.00842342	0.499714478	350.2998488	9.73	1
0.006669337	0.255037421	4.708551909	-1.229370117	0.042051494	0.34656715	29.68835449	105.798584	24.89728356	0.517536161	365.3805296	10.80	1
-0.098821683	0.179977841	-69.86692992	-0.70300293	-0.040179435	0.446689226	-28.40686035	100.1181641	26.32614652	0.536089643	379.0153778	0.74	1
-0.160977965	0.136270739	-113.4894655	-0.860412598	-0.160956893	0.240673374	-113.4746094	104.1317139	24.91619084	0.535859715	377.7810987	12.80	1
-0.026927273	0.230570123	-19.01065467	-1.447387695	-0.15834067	0.462093177	-111.7885132	114.2758179	30.0530776	0.452637703	319.5622186	5.12	1
-0.159439816	0.209155117	-112.7239501	-1.135864258	-0.122507487	0.372230865	-86.61279297	126.2697754	31.93137842	0.538765895	380.9074879	13.47	1
-0.008164198	0.177480299	-5.772087761	-0.783691406	-0.063113977	0.256739093	-44.62158203	115.0819092	28.31634362	0.486631933	344.0487765	15.52	1
-0.324776855	0.347447219	-229.6172363	-1.829223633	-0.414682175	0.461907685	-293.1802979	127.4835205	31.51302026	0.529161974	374.1175159	11.72	1
-0.048789061	0.184886379	-34.15234291	-0.948730469	-0.221284877	0.286732272	-154.8994141	113.4107666	29.31391519	0.444210342	310.9472395	4.83	1
-0.183347759	0.248889318	-129.6268659	-1.340087891	-0.160252594	0.38720445	-113.298584	108.0256348	26.37842775	0.546505074	386.3790874	5.56	1
0.030281252	0.091578714	21.16659531	-0.978393555	0.09832947	0.398124566	68.7322998	105.5146484	31.46627033	0.566218125	395.7864691	7.59	1
-0.012813889	0.256929711	-8.995350111	-1.079223633	0.075214614	0.44153416	52.80065918	105.8297119	28.38885726	0.554682474	389.3870964	1.19	1
-0.091726309	0.154379478	-64.75877424	-0.879272461	-0.172989021	0.313299736	-122.130249	100.8363037	23.5903286	0.476848286	336.65489	10.65	1
-0.176045829	0.230923071	-124.4644013	-1.260742188	-0.1844643	0.308132722	-130.4162598	110.3479004	26.10436636	0.540781649	382.3326261	13.61	1
-0.094321234	0.14902054	-66.30782752	-0.922485352	-0.106017111	0.248323968	-74.5300293	121.3703613	28.7389508	0.517960255	364.1260592	17.07	1
0.06534886	0.097801098	46.33234183	-1.017333984	-0.10235742	0.280545146	-72.57141113	117.8004761	32.61214233	0.389885454	276.4287868	2.66	1
-0.127398512	0.147993006	-89.94334968	-0.849365234	-0.171592561	0.286697797	-121.1443481	124.4000244	33.52927503	0.509603111	359.7797961	17.10	1
-0.019234637	0.206758635	-13.44501107	-0.929077148	-0.008088337	0.333186704	-5.653747559	134.4470215	34.32930688	0.5062635	353.8781862	16.06	1
-0.140810832	0.128213205	-98.99001478	-1.009765625	-0.204388766	0.292838705	-143.6853027	94.9864502	22.19677277	0.509541839	358.2079126	10.80	1
-0.018037404	0.08740872	-12.73440696	-0.918273926	-0.217466619	0.268549619	-153.5314331	89.80407715	25.00654449	0.355044113	250.661144	0.27	1
-0.003342465	0.246734593	-2.339725773	-1.811523438	0.022523717	0.661371541	15.76660156	123.5256348	39.09256329	0.499821875	349.8753123	4.74	1
-0.064372097	0.133338684	-45.44670031	-0.682983398	-0.049520779	0.287316704	-34.96166992	95.98950195	23.98504427	0.541750797	382.4760626	10.27	1
-0.163912189	0.412987995	-115.8859177	-1.667175293	-0.108296568	0.676641086	-76.56567383	114.3043213	28.78562167	0.571163263	403.812427	1.98	1
-0.026822748	0.262916792	-19.01732829	-1.974060059	-0.13356739	0.682036542	-94.69927979	120.4282837	36.87267288	0.492420813	349.1263563	0.61	1
-0.12658291	0.310136302	-89.36753411	-1.798461914	-0.122162643	0.648693313	-86.24682617	77.8260498	20.88893134	0.595816645	420.6465515	0.42	1
-0.024417426	0.150431124	-17.2631202	-0.970092773	-0.074019674	0.314880395	-52.33190918	134.0928955	33.58578306	0.490429862	346.7339125	15.67	1
-0.059644335	0.260374588	-41.98961156	-1.007568359	-0.016910726	0.386337087	-11.90515137	112.3452759	29.30255642	0.516623824	363.7031718	12.34	1
-0.082789044	0.126650442	-58.28348702	-0.775878906	-0.097485282	0.262978956	-68.62963867	100.1606445	26.22899428	0.513867337	361.7626054	12.26	1
-0.110966347	0.231179359	-78.67513979	-1.583740234	-0.050634043	0.485804069	-35.89953613	134.9372559	35.44215324	0.526283788	373.1352057	9.63	1
0.034864596	0.300335269	24.47494645	-1.374145508	0.066172021	0.520192853	46.45275879	114.4356689	32.71783183	0.487819026	342.4489559	8.90	1
-0.028286294	0.219471711	-19.97012332	-1.607788086	-0.068490091	0.446394692	-48.35400391	101.190918	27.35450932	0.492187972	347.4847081	6.68	1
-0.014763145	0.181783836	-10.39325385	-1.058837891	-0.002950495	0.380655578	-2.077148438	136.9194336	36.45602791	0.520344094	366.3222424	17.38	1
-0.12574721	0.297313806	-88.02304715	-1.744140625	-0.217208339	0.644076303	-152.0458374	120.7791748	34.02954283	0.515077709	360.5543963	2.32	1
0.008792665	0.229668294	6.207621562	-1.85168457	-0.197988537	0.482342076	-139.7799072	125.9473877	35.10314044	0.442426753	312.3532875	0.96	1
-0.147309737	0.400189965	-103.5587449	-1.924133301	-0.210250051	0.720911937	-147.8057861	126.2044678	33.46407029	0.537831479	378.0955297	7.28	1
-0.105859151	0.316549779	-74.84241959	-1.47265625	-0.014508411	0.586786305	-10.25744629	113.6806641	31.36208765	0.570341251	403.2312646	0.68	1
-0.147815121	0.173668435	-104.3574752	-0.930053711	-0.033251884	0.449756066	-23.47583008	118.9279785	32.52837203	0.598569355	422.5899645	2.36	1
-0.083190239	0.276323854	-58.48273822	-1.381896973	-0.111226979	0.476239544	-78.19256592	112.7783813	29.0124246	0.513694271	361.1270726	9.86	1
-0.200249061	0.147230519	-140.9753389	-1.173706055	-0.279047879	0.321436877	-196.449707	123.1567383	34.1007238	0.481609929	339.0533899	4.66	1
0.083243814	0.203811593	58.85337652	-1.638793945	-0.097631732	0.610007925	-69.02563477	82.33825684	25.40725729	0.444402825	314.1927971	1.05	1
-0.021957954	0.239813829	-15.52427349	-1.701538086	-0.136626204	0.517455819	-96.59472656	82.78747559	24.46990651	0.458929819	324.4633821	0.46	1
-0.308935787	0.235172435	-218.4176013	-1.310913086	-0.363378803	0.393938192	-256.9088135	95.2878418	24.76600952	0.532595997	376.5453696	7.15	1
0.036829421	0.108233794	25.89108268	-1.244018555	0.019351531	0.386639882	13.60412598	118.1765137	31.47739529	0.491095101	345.2398563	9.86	1
-0.080636908	0.269205817	-57.0102938	-1.085327148	-0.160638833	0.443909102	-113.5716553	104.3962402	28.83238975	0.46060698	325.6491347	3.89	1
-0.041639918	0.100665107	-29.31450248	-0.911987305	-0.031143362	0.357644448	-21.92492676	140.4372559	34.11249316	0.514326334	362.0857389	18.72	1
-0.089860065	0.264550036	-63.44120562	-1.487182617	-0.101475529	0.436927577	-71.64172363	94.46923828	24.49479803	0.501318705	353.9310056	5.76	1
-0.279669236	0.381792812	-197.7261502	-1.661865234	-0.267862323	0.569880212	-189.3786621	106.6900635	27.4278941	0.564411918	399.0392262	10.98	1
0.052240479	0.271942843	36.93401888	-1.272583008	0.074304907	0.382717905	52.53356934	116.0596924	31.84214036	0.499763815	353.3330171	9.65	1
-0.017191327	0.170135197	-12.05112002	-1.089599609	-0.269629986	0.304694188	-189.0106201	95.44714355	26.96531644	0.357519127	250.6209082	0.16	1
-0.163274598	0.27044967	-114.2922188	-1.304321289	-0.171648124	0.378734375	-120.1536865	102.8455811	26.17079238	0.530282627	371.1978386	12.83	1
-0.163766318	0.175971243	-115.7827866	-1.147399902	-0.248647385	0.373694697	-175.7937012	124.6931152	27.87997864	0.518125126	366.3144642	13.50	1
-0.194370748	0.324896072	-137.2257479	-1.439697266	-0.202199617	0.507265239	-142.7529297	105.4608154	26.15359992	0.556849853	393.1359963	12.34	0
0.055417882	0.125474717	39.18044225	-0.552307129	0.092591541	0.283621012	65.46221924	149.8347168	39.16851514	0.511230372	361.4398727	14.54	0
0.119316589	0.305395452	83.998879	-1.424194336	-0.003101956	0.533199987	-2.183776855	109.7623291	27.18255565	0.444126665	312.6651719	1.91	0
-0.030195576	0.089467709	-21.22748963	-0.919189453	-0.215774124	0.17469831	-151.689209	62.70922852	17.43477976	0.308532994	216.8986947	0.50	0
0.182429828	0.279155283	128.4305991	-1.1640625	0.201043476	0.407710663	141.5346069	113.1637573	28.33046894	0.470930393	331.5349964	14.14	0
0.008857552	0.161736928	6.218001491	-1.344726563	0.090862915	0.721284561	63.7857666	88.27734375	30.95972965	0.495372093	347.7512095	0.48	0
0.061347111	0.385430129	43.31106052	-0.932128906	0.090043627	0.532170776	63.57080078	152.0090332	39.89624666	0.496768399	350.7184896	17.91	0
-0.051762754	0.470644624	-36.3892164	-1.784423828	-0.295715592	0.73945393	-207.8880615	113.3336792	27.34612556	0.453144199	318.5603718	8.27	0
0.037263386	0.111992372	26.30795054	-1.034606934	-0.093087518	0.286499824	-65.7197876	160.7965698	42.51001613	0.442647376	312.5090471	7.63	0
-0.036462528	0.167909493	-25.59669453	-1.272827148	-0.176411338	0.341144993	-123.8407593	101.0296021	28.82646286	0.459535931	322.5942236	2.34	0
-0.078809058	0.248348288	-55.48157702	-1.091918945	0.097249465	0.593578706	68.46362305	112.6783447	28.24234216	0.541375286	381.1282012	0.83	0
-0.092701656	0.374897582	-65.63277241	-0.968994141	-0.077976895	0.509001943	-55.2076416	135.9304199	37.74514993	0.510340607	361.3211496	16.26	0
0.07212625	0.202703989	50.99325899	-1.106445313	0.254430099	0.475667623	179.8820801	93.18139648	27.35629994	0.633997155	448.2359887	0.36	0
-0.118156918	0.424292442	-83.53694095	-1.437866211	-0.069373146	0.505435456	-49.04681396	135.7843018	33.61156437	0.557331745	394.0335435	16.02	0
0.114333218	0.174548882	80.49058555	-0.252380371	0.365623994	0.235937463	257.399292	62.59606934	15.01032	0.594788242	418.7309226	2.22	0
0.056594445	0.415072832	39.95567786	-0.793701172	0.378864407	0.543484131	267.4782715	122.0026855	28.82787696	0.581042081	410.2157093	3.42	0
0.132238062	0.176559766	93.0955953	-0.400512695	0.196243286	0.268204652	138.1552734	112.487793	28.25326545	0.515744581	363.0841849	12.71	0
0.040440854	0.244286766	28.55124313	-0.49597168	0.243304115	0.309943557	171.7727051	86.34741211	21.68860425	0.616185773	435.0271558	2.27	0
0.009982435	0.1805774	7.047599122	-0.752197266	-0.031939196	0.294386915	-22.54907227	139.0887451	34.05906147	0.48748575	344.1649398	18.05	0
0.018076543	0.40305073	12.7439626	-1.170166016	0.042897586	0.546921458	30.24279785	85.98669434	20.11700696	0.501138778	353.3028383	2.86	0
0.052583722	0.267728498	36.91377291	-1.257446289	-0.131625097	0.451351098	-92.40081787	71.31768799	17.7682201	0.363724641	255.3346983	0.64	0
-0.011076439	0.355356491	-7.842119073	-2.282470703	-0.245711677	0.629425905	-173.9638672	94.16149902	23.99590923	0.460181414	325.8084415	0.70	0
0.063958388	0.160676929	45.15462199	-0.135742188	0.196598907	0.195058836	138.7988281	108.074707	25.33363218	0.553969178	391.1022398	6.47	0
0.14112839	0.279678754	99.77777176	-0.911071777	0.255280016	0.352185538	180.4829712	134.8203125	33.01576497	0.530326036	374.9405077	13.68	0
0.191648008	0.219398844	134.9201979	-1.46472168	0.164436514	0.451128578	115.7633057	164.2662354	39.56127438	0.45254304	318.5903003	20.50	0
-0.213903456	0.153492862	-150.3741293	-1.194824219	-0.34176805	0.317874562	-240.2629395	96.29150391	21.87232997	0.50148535	352.544201	9.41	0
0.062603747	0.227183046	44.19824507	-1.121948242	-0.257686972	0.49811942	-181.927002	91.95111084	25.76752289	0.319630122	225.658866	1.07	0
0.004185502	0.074575328	2.967520849	-0.862792969	0.05819035	0.276396309	41.25695801	128.5515137	35.61296172	0.517705438	367.0531555	12.78	0
0.068918208	0.345366894	48.79409114	-0.802001953	0.308852029	0.515770436	218.6672363	71.63293457	17.43294771	0.584389584	413.7478254	0.80	0
0.216134624	0.288600636	152.1587755	-0.25769043	0.456458178	0.34497727	321.3465576	98.10888672	24.05379811	0.562691162	396.1345779	0.63	0
0.029333087	0.313416623	20.76782555	-0.536743164	0.194905254	0.4516823	137.9929199	107.1502686	22.55875159	0.542165017	383.8528319	3.35	0
0.051715106	0.165382585	36.35571919	-0.884277344	0.041027954	0.312893033	28.84265137	149.2454834	35.02913318	0.484864672	340.8598643	17.22	0
0.268404479	0.179989938	188.4199443	-0.732788086	0.301090947	0.371939971	211.3658447	115.5099487	29.94899205	0.468032171	328.5585838	9.20	0
-0.013445447	0.232302593	-9.492485348	-1.755249023	-0.262337228	0.490819035	-185.210083	104.3798828	27.30644176	0.466814138	329.5707811	3.31	0
-0.031524441	0.356543728	-22.1616817	-1.943054199	-0.250053742	0.545473112	-175.7877808	114.0148926	30.32707852	0.380228638	267.3007326	0.18	0
0.042884546	0.322413734	30.27648963	-1.366699219	-0.12883631	0.494146468	-90.95843506	111.7670898	29.43688618	0.414815754	292.8599221	2.86	0
-0.071370583	0.398256035	-50.45900236	-1.483398438	-0.217514448	0.578497486	-153.7827148	82.1328125	20.32732902	0.456657866	322.8571116	0.66	0
0.077238149	0.234938263	54.37565673	-1.085693359	0.207080147	0.2936494	145.7844238	95.17834473	23.91704141	0.570344139	401.522274	3.99	0
-0.143470794	0.455402635	-101.4338511	-1.935791016	-0.232458134	0.749664946	-164.3479004	86.21008301	21.38578829	0.506496674	358.0931486	7.01	0
-0.116223345	0.311711088	-81.82123486	-0.942138672	0.01044048	0.611343212	7.350097656	156.6755371	42.9152325	0.545228643	383.8409649	5.00	0
0.173703965	0.191297698	122.634999	-0.490478516	0.162994298	0.254113906	115.0739746	134.6942139	30.83694977	0.482564675	340.6906607	16.29	0
0.013763025	0.104414526	9.689169842	-0.773193359	-0.034910722	0.194428463	-24.57714844	143.2371826	36.99239021	0.478721862	337.0201907	18.77	0
-0.090521192	0.193075346	-63.81744053	-1.992431641	-0.44697508	0.351194753	-315.1174316	83.56652832	19.0889177	0.404097345	284.8886284	1.84	0
0.006390497	0.059022435	4.498909933	-0.648254395	-0.025012016	0.171323913	-17.60845947	19.11199951	3.727949752	0.505986154	356.2142524	0.12	0
0.060315536	0.153718851	42.58276821	-2.013305664	-0.287321183	0.614986268	-202.8487549	102.1628418	29.22341636	0.379072571	267.6252348	0.43	0
-0.258818882	0.188365985	-181.6908549	-1.458740234	-0.343885634	0.331916207	-241.4077148	128.0167236	30.81152165	0.519292398	364.5432633	16.54	0
0.067998142	0.430524032	48.07468609	-0.858398438	0.205765828	0.726970767	145.4764404	100.1203613	28.1537184	0.484435709	342.4960465	1.87	0
-0.088179429	0.218400876	-62.16649745	-1.147705078	-0.236441105	0.383129182	-166.690979	68.46148682	18.51139405	0.470172663	331.4717277	2.90	0
0.276227527	0.255104365	195.5690893	-0.840820313	0.361130537	0.408374368	255.6804199	137.489502	36.01925601	0.487116569	344.8785311	8.79	0
-0.003903972	0.030128047	-2.752300447	-0.619140625	-0.130798167	0.180479304	-92.21270752	34.01586914	8.754270974	0.26401418	186.1299966	0.03	0
-0.086938092	0.107154529	-61.20441666	-0.745239258	-0.24405254	0.195900528	-171.8129883	148.5780029	37.55568755	0.460951623	324.5099423	16.33	0
-0.006159192	0.267625796	-4.348389614	-0.862182617	0.081149093	0.369441059	57.29125977	117.5906982	27.6741943	0.548214752	387.0396149	0.96	0
0.010201292	0.074142208	7.232715884	-0.879150391	-0.085277649	0.187903615	-60.46185303	28.00964355	5.925015599	0.260733408	184.8599863	0.06	0
-0.030445498	0.219725356	-21.37273993	-1.969970703	-0.376801928	0.638146267	-264.5149536	82.45678711	19.45094697	0.397665551	279.1612169	1.89	0
0.114897215	0.348311544	80.88763943	-0.996948242	0.478278594	0.640303158	336.7081299	113.7939453	30.72740412	0.589185857	414.786843	0.69	0
0.167901301	0.414698873	118.5383186	-0.48449707	0.327353934	0.589045386	231.1118774	113.3532104	27.28027542	0.52290585	369.1715303	4.82	0
0.037715148	0.208879343	26.62689463	-1.618225098	-0.13283005	0.368964593	-93.77801514	119.651123	31.09941281	0.423845772	299.2351148	1.64	0
-0.005545942	0.052148714	-3.898797109	-1.231384277	-0.20153852	0.348274653	-141.6815796	30.47375488	5.064001141	0.334899624	235.4344357	0.03	0
0.181367528	0.167098032	127.6827395	-1.286987305	0.112703757	0.299962063	79.34344482	158.9621582	35.3690868	0.444361058	312.8301851	17.89	0
-0.017395764	0.063271176	-12.21182603	-1.034484863	-0.269272503	0.303624369	-189.0292969	74.1151123	18.88537596	0.288054967	202.2145866	0.41	0
-0.000292771	0.139430565	-0.206989328	-1.751708984	-0.259546865	0.518922208	-183.4996338	91.79559326	27.51969214	0.358591953	253.5245108	0.14	0
-0.139719271	0.399066846	-98.78152439	-1.709289551	-0.049560892	0.76329942	-35.03955078	74.58532715	16.14086057	0.584820726	413.4682535	3.22	0
0.057108233	0.156162602	40.31841281	-0.491088867	0.108607824	0.207782155	76.67712402	103.0550537	25.08179488	0.513512409	362.5397607	13.39	0
-0.15997814	0.132438253	-112.9445666	-1.171386719	-0.103727605	0.5723876	-73.23168945	171.6013184	45.11378138	0.517174795	365.1254051	4.38	0
0.290131157	0.300907673	204.5424658	-1.981140137	0.275320932	0.588257274	194.1012573	137.3615112	35.11530048	0.476473724	335.9139755	8.76	0
0.047846419	0.168504587	33.68387917	-0.37109375	0.376059619	0.464903839	264.7459717	81.62365723	21.63188758	0.596865209	420.1931072	0.39	0
-0.018904971	0.05764924	-13.34690951	-0.517700195	-0.07595246	0.108689521	-53.62243652	33.0736084	8.187129793	0.422477177	298.2688871	2.03	0
0.275940703	0.28215683	194.8141365	-0.378845215	0.454529414	0.313836683	320.8977661	121.4664307	29.88326432	0.524952434	370.6164183	14.36	0
-0.206518718	0.384841903	-146.008734	-1.931030273	-0.224040289	0.622279671	-158.3964844	118.9779053	34.03624907	0.538895311	380.9989849	6.61	0
-0.160672108	0.14023114	-112.9524921	-1.063354492	-0.254814918	0.220544178	-179.1348877	93.47875977	22.67056422	0.489289061	343.9702098	9.95	0
-0.018604892	0.145732387	-13.09784387	-1.637695313	-0.234552037	0.546288645	-165.1246338	92.64562988	27.60709433	0.463992538	326.6507471	0.78	0
0.127970252	0.161347556	90.09105748	-1.614868164	0.055424257	0.488727693	39.01867676	136.1092529	32.66982866	0.462352987	325.4965026	7.00	0
0.14868835	0.151219882	104.6765987	-0.605285645	0.212670586	0.27079985	149.7200928	135.2727661	31.89439374	0.496398997	349.4648941	17.25	0
-0.122554149	0.418868152	-86.52322947	-1.382080078	-0.113002529	0.520828927	-79.77978516	129.1762695	30.91096105	0.528053154	372.8055269	8.89	0
-0.047103614	0.238519365	-33.34935858	-0.598632813	0.113150042	0.382635226	80.11022949	135.7005005	38.00713572	0.578195397	409.3623413	1.37	0
0.025908671	0.281214319	18.21379569	-1.902893066	-0.242762168	0.610248247	-170.6618042	125.9180298	34.75639798	0.444185411	312.262344	2.11	0
0.04052057	0.288750963	28.48596049	-1.682067871	-0.318000544	0.573113901	-223.5543823	57.44219971	13.15225339	0.371010637	260.8204778	0.31	0
-0.171924872	0.372902614	-122.0666592	-1.722412109	-0.276496307	0.524325297	-196.3123779	97.72601318	23.2150102	0.515705466	366.1508808	4.43	0
-0.200388509	0.297782238	-140.672733	-1.89440918	-0.170591523	0.391768034	-119.755249	147.8422852	34.76504981	0.54752665	384.3637085	19.74	0
0.046020653	0.240697523	32.49058106	-0.744384766	0.130050011	0.283529171	91.81530762	133.442627	33.34225599	0.538245266	380.001158	15.46	0
-0.011841504	0.267524494	-8.324577166	-1.53527832	-0.263912543	0.479643699	-185.5305176	71.37963867	20.25701236	0.362208292	254.632429	0.15	0
-5.34369E-05	0.077555445	-0.037566174	-1.666687012	-0.323466099	0.343407405	-227.3966675	34.53771973	7.937229703	0.286334608	201.2932292	0.14	0
-0.161068534	0.096063644	-113.3922477	-0.861938477	-0.181530346	0.277376401	-127.7973633	97.01318359	26.92498436	0.504603666	355.2409807	10.03	0
0.274812707	0.307695192	194.5673963	-0.356445313	0.476905952	0.471497228	337.6494141	73.12390137	17.74206881	0.528114195	373.9048499	2.37	0
-0.015010977	0.158580039	-10.59774991	-1.369140625	-0.276835498	0.401632471	-195.4458618	78.82122803	20.86750705	0.363950368	256.9489601	0.28	0
-0.129949985	0.203427724	-91.61473928	-1.250732422	-0.178687909	0.389491454	-125.9749756	140.414917	37.10362599	0.493789575	348.1216505	12.06	0
0.160884782	0.106527417	113.102002	-0.598510742	0.144725729	0.223091222	101.7421875	154.9588623	37.7599418	0.483901699	340.1828943	21.37	0
-0.026180057	0.116250089	-18.50930053	-1.405822754	-0.062259572	0.418127177	-44.01751709	127.5119629	34.40998368	0.51738337	365.7900428	0.79	0
-0.138639691	0.345071115	-97.3250632	-1.475769043	-0.35964079	0.501828526	-252.4678345	95.28735352	25.05098585	0.460775177	323.4641744	3.54	0
-0.196103115	0.147907141	-137.8604896	-0.965698242	-0.21417245	0.247890007	-150.5632324	99.02294922	24.28591745	0.515018403	362.0579375	12.42	0
-0.196600404	0.272477736	-138.6032852	-1.537719727	-0.185186032	0.430408792	-130.5561523	108.9490967	25.4286766	0.55390883	390.5057253	12.20	0
0.123670804	0.148312125	87.43525861	-0.353149414	0.132411757	0.192448147	93.6151123	173.3822021	41.87439992	0.487951635	344.9818058	23.35	0
0.221128955	0.371082763	156.3381709	-0.884765625	0.330376826	0.604052399	233.576416	124.4511719	34.41789495	0.506333687	357.9779167	2.13	0
0.034607096	0.237915643	24.46721696	-0.843383789	0.30532565	0.448773116	215.8652344	71.33679199	15.94460146	0.59530782	420.8826287	2.56	0
0.141622528	0.125146443	99.56063724	-0.546630859	0.093659185	0.269482665	65.84240723	129.6875	33.63897209	0.463402772	325.7721491	17.62	0
0.145800397	0.255062153	102.3518786	-1.138061523	0.104069463	0.566172077	73.0567627	85.48242188	22.29542792	0.462056782	324.3638608	3.50	0
0.063018434	0.30634384	44.55403317	-0.79675293	0.186062091	0.568784515	131.5458984	120.5957031	33.717401	0.52458696	370.8829809	3.75	0
-0.01199186	0.124141214	-8.430277837	-0.981262207	-0.059601047	0.29701634	-41.89953613	29.28704834	8.986010706	0.467980081	328.9899966	0.47	0
0.073541359	0.16573699	51.62603372	-0.368041992	0.137207988	0.208137303	96.32000732	89.91992188	21.27561178	0.532153693	373.5718924	9.03	0
-0.257022525	0.297738359	-180.9438574	-1.424987793	-0.294496536	0.367575105	-207.3255615	134.9567261	31.82018778	0.535627854	377.0820091	16.39	0
-0.009444987	0.21070236	-6.668160923	-1.273986816	-0.150263108	0.443624287	-106.0857544	113.2425537	30.63157436	0.456611875	322.3679837	0.86	0
0.002848805	0.08736199	2.014104957	-1.189453125	-0.105254911	0.18385561	-74.41522217	30.85321045	6.415939551	0.376363765	266.0891816	0.09	0
0.071453275	0.303016105	50.58891892	-0.913452148	0.263196008	0.451881628	186.3427734	89.91186523	22.61936888	0.577094253	408.582731	0.07	0
0.274487487	0.367625936	192.6902157	-0.38684082	0.402523204	0.518842315	282.5712891	140.0170898	35.60103223	0.502395494	352.681637	6.60	0
0.025805026	0.114238939	18.26995854	-0.766357422	-0.036491092	0.297372509	-25.83569336	141.3997803	34.02297253	0.475299158	336.5118041	16.68	0
0.055095345	0.13717885	39.00750437	-0.919189453	-0.041454595	0.247461221	-29.34985352	151.2344971	36.56377874	0.45268713	320.502488	19.54	0
-0.22058184	0.264850693	-155.951361	-1.404174805	-0.197650656	0.406825491	-139.7390137	121.3125	30.58925585	0.545308915	385.5334032	17.54	0
-0.128955929	0.382102542	-91.30079748	-1.816223145	-0.387579966	0.609964225	-274.4066162	100.4732666	26.28066877	0.484153996	342.7810295	1.45	0
0.072317352	0.241961261	50.91141593	-0.563110352	0.412735852	0.368548546	290.56604	66.96936035	15.30173144	0.621930466	437.8390482	1.07	0
0.010817199	0.197694446	7.636942626	-0.637084961	0.207484605	0.321972855	146.4841309	93.1986084	22.59077306	0.582895088	411.5239323	1.10	0
-0.036110609	0.126025567	-25.5302005	-1.031005859	-0.030298473	0.289494438	-21.42102051	135.065918	33.91215992	0.509258761	360.0459438	17.33	0
0.034928955	0.349495068	24.69477096	-1.62487793	0.096536466	0.65016194	68.25128174	119.6262207	35.32961451	0.515179759	364.2320897	0.43	0
-0.03165287	0.109197726	-22.31527351	-0.457275391	0.121068124	0.242765951	85.35302734	106.9105225	26.540621	0.582668581	410.7813495	1.71	0
-0.209406442	0.34856175	-147.8409482	-1.275756836	-0.326374951	0.474241238	-230.4207153	95.82208252	24.10573015	0.513202367	362.320871	6.51	0
0.014648001	0.197391049	10.28289683	-1.112548828	-0.378432141	0.382415687	-265.6593628	75.36907959	17.40669512	0.322139897	226.1422074	1.07	0
0.02532625	0.355408102	17.8296801	-0.74206543	0.313961376	0.615191661	221.0288086	102.8214111	27.79526661	0.579062105	407.6597217	0.96	0
-0.038223055	0.201799674	-26.98547709	-0.721313477	0.221093888	0.566636962	156.0922852	90.77026367	25.10605741	0.561002927	396.0680665	0.51	0
0.093725901	0.148390663	66.45166346	-0.295654297	0.235956577	0.243888294	167.2932129	96.17749023	25.21563756	0.564795305	400.4398711	0.96	0
0.094006838	0.14913737	66.08680701	-0.718688965	0.029534851	0.257824014	20.76300049	146.0393066	36.30515386	0.458406138	322.2595148	15.23	0
0.01512158	0.075217607	10.63047042	-0.57434082	-0.088447668	0.236865057	-62.17871094	44.99853516	10.57741841	0.344048888	241.866368	0.45	0
0.017324981	0.305382502	12.23143648	-2.015808105	-0.156035426	0.660985878	-110.1610107	120.8723755	32.83707198	0.490866737	346.551916	3.37	0
0.013914839	0.0773504	9.782131887	-0.653198242	0.133619067	0.31976078	93.9342041	74.04455566	20.40859572	0.613552072	431.3271063	0.08	0
0.008574467	0.233512135	6.036424579	-0.847167969	0.095026623	0.321387302	66.89874268	126.5692139	33.15801827	0.520014081	366.0899129	14.53	0
0.009829756	0.197022972	6.95946731	-1.134765625	-0.158567698	0.34124533	-112.2659302	76.90441895	21.85302888	0.401870995	284.5246645	0.09	0
-0.00287111	0.079476473	-2.018390041	-1.02532959	-0.285562746	0.27631731	-200.7506104	76.93041992	21.31089198	0.311257082	218.8137288	0.07	0
0.073704775	0.10690965	51.81445715	-0.799377441	-0.107298155	0.278764068	-75.43060303	82.84619141	22.66255333	0.326435351	229.484052	0.00	0
-0.094341276	0.379510021	-66.69928242	-2.212219238	-0.239863502	0.782110978	-169.5834961	131.7678223	36.29902124	0.538865219	380.9777101	6.40	0
-0.000842558	0.337369852	-0.593160832	-1.61730957	-0.299972534	0.512001769	-211.1806641	52.01452637	11.9487097	0.378826495	266.6938522	2.10	0
0.191983333	0.372926731	134.7722996	-0.841064453	0.413642383	0.503102503	290.3769531	75.41955566	19.88302628	0.552321392	387.7296169	2.79	0
-0.037964241	0.153954194	-26.84071806	-1.008666992	-0.066046945	0.31480829	-46.69519043	112.5013428	25.88628978	0.497223378	351.5369285	10.88	0
0.000224409	0.103176192	0.157535436	-0.974487305	-0.214404071	0.214560608	-150.5116577	128.8543701	34.15025593	0.390404263	274.0637929	6.24	0
0.101703812	0.126422475	71.59948339	-0.327636719	0.117522673	0.213459272	82.73596191	137.3615112	34.47671152	0.489666238	344.7250314	18.46	0
-0.020311696	0.358454681	-14.31974566	-0.813964844	0.110552416	0.58009374	77.93945313	115.5941162	30.51620422	0.490531921	345.8250043	0.97	0
-0.126581788	0.208474862	-89.36674236	-1.011474609	-0.13829797	0.326361769	-97.6383667	142.1849976	38.84509033	0.504853585	356.4266309	15.88	0
0.032210277	0.100220685	22.74045571	-0.481689453	0.037703992	0.237314993	26.61901855	129.9753418	30.29133762	0.489737329	345.7545542	17.22	0
-0.018030721	0.095283242	-12.74771945	-0.466796875	-0.000789227	0.22219647	-0.557983398	112.4313965	27.74976355	0.501858163	354.8137214	15.55	0
-0.064017378	0.213640207	-45.32430348	-0.989990234	0.046920518	0.394248012	33.21972656	106.1541748	26.77240916	0.555616156	393.3762383	1.03	0
-0.24943886	0.204122178	-176.1038349	-0.976074219	-0.265397458	0.349761081	-187.3706055	95.18737793	23.8753743	0.555465214	392.1584408	10.95	0
0.016863018	0.177136863	11.88842783	-1.637207031	-0.36668554	0.509135677	-258.5133057	82.11590576	20.28569634	0.367741484	259.2577465	0.59	0
0.051515107	0.398589957	36.52421102	-0.585327148	0.406381712	0.614183119	288.1246338	137.5695801	37.92568718	0.595479645	422.1950683	0.81	0
-0.083147489	0.186169247	-58.61897961	-1.699951172	-0.03915375	0.432084767	-27.60339355	72.47631836	18.14866816	0.757289742	536.9184271	2.60	0
0.053756567	0.352947871	38.00589297	-1.455322266	-0.051572635	0.550557025	-36.46185303	114.7080078	28.79744692	0.552552162	389.5492742	7.35	0
0.150193109	0.12158346	106.1865282	-0.433105469	0.137324699	0.184252183	97.08856201	108.7064819	26.71739708	0.463065705	327.3874533	16.01	0
-0.053365637	0.304002697	-37.72950515	-0.883544922	-0.001795746	0.36719334	-1.269592285	160.2915649	41.34865513	0.451609276	319.2877579	20.78	0
0.051331527	0.102370738	36.24005783	-0.084960938	0.308315547	0.198306387	217.6707764	32.25170898	6.739127042	0.53289786	376.7587867	0.21	0
-0.276032592	0.304379401	-195.1550425	-2.148193359	-0.333306168	0.384223335	-235.6474609	134.3314209	33.64295032	0.744279829	525.4615593	21.13	0
-0.001221366	0.396179904	-0.863505802	-2.148193359	-0.205019421	0.99149568	-144.9487305	112.4024658	37.79902899	0.529053369	374.0407316	0.11	0
0.161339261	0.330148769	113.4215002	-0.709228516	0.277240954	0.418884976	194.9003906	100.5388184	20.91570331	0.405973383	287.0231815	6.76	0
0.154404844	0.37344463	108.3922008	-0.748779297	0.354858051	0.527020535	249.1103516	112.5576172	32.87749144	0.503262764	353.7937229	0.70	0
-0.133033623	0.08366109	-94.05477117	-0.953613281	-0.174519281	0.247464495	-123.3851318	125.5495605	32.73362178	0.575567129	404.0481246	13.52	0
0.030263506	0.097307295	21.33577205	-0.879760742	0.150267516	0.468895804	105.9385986	115.9102783	30.95335123	0.522889108	369.6825994	9.19	0
0.06386631	0.224329679	45.08961472	-1.094360352	0.157658996	0.426964203	111.307251	127.1612549	32.89690643	0.570079921	401.9063443	9.69	0
-0.19484468	0.252322701	-136.97581	-1.421081543	-0.248304299	0.511801986	-174.5579224	72.49285889	20.72452052	0.520561881	367.5166882	2.87	0
-0.001798527	0.236578166	-1.271558881	-1.167724609	0.024753684	0.434180443	17.50085449	129.5189209	28.81852711	0.518305799	364.3689768	5.38	0
-0.04469397	0.1847165	-31.59863645	-1.573486328	-0.343400192	0.452252011	-242.7839355	75.18408203	18.36124733	0.520695524	368.1317352	1.09	0
-0.05449626	0.261514582	-38.52885585	-1.289123535	-0.249681529	0.458531925	-176.5248413	71.83795166	18.02045195	0.414941946	293.3639558	4.01	0
-0.198970661	0.314747622	-140.0753454	-1.509887695	-0.295492866	0.523271913	-208.0269775	89.09509277	23.24081248	0.446753048	315.8544049	5.35	0
0.239562184	0.384955018	169.130902	-0.867675781	0.376650543	0.619263751	265.9152832	126.8453369	31.41672615	0.538193152	378.8879792	9.04	0
0.002818512	0.019137666	1.998325337	-0.141174316	-0.003082405	0.04094953	-2.185424805	2.30645752	0.567885069	0.48537041	342.6715096	0.05	0
0.1338855	0.156407334	94.38927732	-0.700439453	0.22894036	0.286380526	161.4029541	54.48425293	14.68651184	0.541258937	383.7525864	0.90	0
0.07478881	0.331173629	53.02526646	-1.113037109	0.083332186	0.669227939	59.08251953	164.2114258	44.72101113	0.573230672	404.1276236	7.36	0
0.072029029	0.435230906	50.99655258	-1.498901367	-0.021752223	0.673565417	-15.40057373	92.65863037	22.19882568	0.481814408	341.6064154	8.78	0
-0.032821428	0.324621397	-23.13910698	-1.082885742	0.097557555	0.428567699	68.77807617	101.4161377	23.67252913	0.481121335	340.633905	5.28	0
-0.013623427	0.332671692	-9.604516131	-2.067504883	-0.154236273	0.663084383	-108.7365723	80.42858887	21.05868596	0.549838132	387.6358829	0.60	0
-0.013360308	0.170188642	-9.445737525	-1.460327148	-0.280380314	0.525570526	-198.2288818	116.9307861	35.3308278	0.507665576	357.9042309	0.33	0
-0.096924602	0.199191453	-68.42876919	-0.498657227	0.154348228	0.31058662	108.9698486	54.1204834	11.33080371	0.432509441	305.7841745	0.21	0
0.006063198	0.374064862	4.286681185	-1.471923828	-0.115671722	0.592176199	-81.77990723	78.30957031	20.30130848	0.690554187	487.5312563	3.45	0
-0.207770835	0.106153327	-146.6862097	-0.81652832	-0.284753729	0.270801507	-201.0361328	103.5507813	25.87381428	0.476487547	336.8766955	10.98	0
-0.008663249	0.099583831	-6.081600576	-0.552124023	-0.115024143	0.180178916	-80.74694824	143.7619629	34.33374115	0.515352855	363.8391156	15.19	0
0.004384405	0.107056671	3.095390267	-0.268554688	0.142881053	0.219610697	100.8740234	137.21875	36.9745572	0.462611253	324.7530993	5.52	0
-0.023614738	0.251885144	-16.67200481	-1.419555664	-0.151896188	0.519566062	-107.2387085	96.82067871	25.54518951	0.572531044	404.2069172	4.00	0
0.04832535	0.105491295	34.06937142	-0.608520508	0.062385981	0.234215938	43.9821167	149.8088989	40.8824015	0.503559832	355.5132416	18.73	0
-0.002756504	0.557742459	-1.948848202	-1.904174805	-0.095453546	0.808533831	-67.48565674	134.5090332	34.07734374	0.493665119	348.0339088	10.42	0
0.186217219	0.149297897	131.2831393	-0.369995117	0.236797187	0.21058932	166.9420166	92.21264648	20.48469387	0.502192634	355.0501924	11.62	0
0.072149005	0.330028895	50.93719774	-0.569824219	0.314666662	0.497730733	222.1546631	79.76635742	21.66835063	0.494539768	348.6505366	1.49	0
0.023986717	0.283585731	16.86266184	-1.704711914	-0.182954053	0.713697535	-128.6166992	129.2479858	37.55109164	0.595922132	420.721025	3.27	0
0.049201028	0.147867996	34.68672458	-1.62286377	-0.137516709	0.448518489	-96.94927979	88.52264404	25.52270083	0.483598753	339.9699233	0.30	0
0.045271237	0.270720707	32.00676459	-1.518798828	-0.216996901	0.505867983	-153.4168091	85.7119751	19.5716897	0.388009072	273.5463961	0.18	0
0.014239564	0.172873849	9.99617396	-1.389221191	-0.317343687	0.384890588	-222.7752686	54.93933105	13.38482519	0.388443022	274.6292165	0.86	0
0.150605749	0.381113538	106.1770527	-3.258483887	-0.070162206	1.265325168	-49.46435547	81.80981445	15.11540572	0.327774163	230.0974621	0.33	0
-0.096432768	0.1645424	-68.0815339	-0.923583984	-0.1323588	0.211033528	-93.4453125	112.5408936	25.62319459	0.40315934	284.2273348	12.96	0
0.058809862	0.148051153	41.40214282	-1.281005859	-0.196430206	0.43169228	-138.2868652	114.3215332	31.0194444	0.513051575	362.2144119	0.71	0
0.065568521	0.187347135	46.29137556	-0.277099609	0.420621099	0.325924243	296.9584961	84.5	20.07446082	0.385790147	271.5962634	0.75	0
-0.217993779	0.278575059	-153.4676201	-1.653442383	-0.303088015	0.428271016	-213.3739624	98.52752686	25.49443631	0.624979544	441.2355582	9.36	0
-0.171790107	0.398143938	-121.4556057	-1.550292969	-0.344786907	0.584316181	-243.7643433	82.5234375	19.08897168	0.520817384	366.6554383	7.10	0
0.09743391	0.1013122	68.9832083	-0.427368164	0.024650789	0.253876771	17.45275879	45.38793945	12.40025812	0.515293245	364.3123242	1.53	0
-0.07547469	0.232837764	-52.98323272	-1.421447754	-0.203550594	0.400226365	-142.8925171	92.99285889	24.92647523	0.330529189	234.0146658	0.15	0
0.006962363	0.017329914	4.887578912	-0.82208252	-0.058795114	0.142451791	-41.27416992	10.25311279	1.56379046	0.401548874	281.8873095	0.01	0
0.245555366	0.333328704	172.8709774	-0.716430664	0.480596022	0.607132983	338.3395996	129.5966797	32.21859161	0.332123976	233.1510311	0.90	0
0.021826342	0.146392802	15.34391822	-0.604370117	0.230383665	0.350462206	161.9597168	72.84204102	19.70292677	0.519839002	365.9666575	1.71	0
-0.024110446	0.250235654	-17.02197512	-1.499084473	-0.333440592	0.506958773	-235.4090576	81.83178711	19.66666354	0.641707655	451.1204813	2.57	0
0.017220105	0.080266834	12.17461416	-1.243286133	-0.292862823	0.389218139	-207.0540161	54.75927734	11.28402175	0.388535834	274.3062987	0.08	0
0.136656495	0.215356417	96.2061723	-0.769226074	0.082529675	0.289582482	58.10089111	105.1549683	28.5691893	0.258102397	182.4783948	7.84	0
0.137844236	0.203935179	97.1801866	-0.61706543	0.147173856	0.289685735	103.7575684	122.1898193	27.90522133	0.45494183	320.2790483	15.60	0
0.084409298	0.235262727	59.59296427	-1.222839355	-0.264363059	0.431690344	-186.6403198	55.18023682	12.13928126	0.482778635	340.3589379	0.19	0
0.075062608	0.254291617	53.06926406	-1.401306152	-0.128694569	0.496863287	-90.98706055	99.52618408	28.75975944	0.307361453	216.9971858	0.83	0
0.000156569	0.111609924	0.1099113	-1.191772461	-0.050376436	0.332804071	-35.36425781	143.9702148	38.68466548	0.417462064	295.1456795	12.93	0
-0.169953002	0.291720969	-119.9868195	-2.073913574	-0.36336165	0.475946489	-256.5333252	74.03540039	15.59465508	0.482474716	338.6972505	3.79	0
-0.011124184	0.350435864	-7.853673725	-1.473022461	0.045303647	0.516398282	31.984375	90.40869141	23.07806086	0.49296289	348.0318004	4.32	0
0.014884834	0.243888066	10.5235775	-1.516113281	-0.27669714	0.594039839	-195.6248779	102.0323486	27.97120696	0.543637909	383.8083637	1.97	0
0.073689406	0.145146514	52.09840973	-0.637329102	0.010755828	0.232308537	7.604370117	119.0775146	30.86348467	0.44368929	313.6883279	12.65	0
0.038316927	0.348575506	27.05175038	-0.730102539	0.28300636	0.395806073	199.8024902	92.05480957	19.57528716	0.439682746	310.8557017	5.16	0
-0.193276601	0.207395178	-135.6801738	-0.76184082	-0.167027487	0.31009726	-117.2532959	171.3425293	43.90464783	0.601551898	424.6956401	23.05	0
0.004449047	0.090731688	3.149925489	-0.992126465	-0.037235238	0.233489189	-26.36254883	10.88494873	1.857464554	0.538828726	378.2577656	0.02	0
0.139689273	0.180107598	98.62062673	-0.943603516	0.155837191	0.427150722	110.0210571	116.5515747	32.49539701	0.481108148	340.6245688	3.47	0
-0.021913798	0.134263761	-15.40540007	-0.758666992	0.002268632	0.363887794	1.594848633	146.9558105	36.32361588	0.461918659	326.1145735	16.69	0
0.057301315	0.283004014	40.51202992	-1.934570313	-0.220461402	0.660578236	-155.8662109	76.74328613	20.56098325	0.507522424	356.7882644	1.61	0
-0.170969168	0.123976256	-120.8752018	-0.813720703	-0.17177175	0.395784587	-121.442627	152.6173096	40.96943308	0.411767657	291.1197333	15.78	0
0.002972992	0.303984518	2.104878392	-0.858886719	0.384619416	0.637088189	272.3105469	93.27404785	24.21839955	0.519189385	367.0668953	2.83	0
0.184248846	0.197749339	130.0796853	0.046264648	0.512356593	0.212091526	361.7237549	58.21728516	13.77324168	0.627735202	444.436523	0.19	0
-0.006664194	0.219938353	-4.704921223	-1.897521973	-0.36213429	0.659676582	-255.6668091	101.0064697	28.02795287	0.639840742	451.727564	1.80	0
-0.003667563	0.147261897	-2.581964373	-0.804443359	-0.072250713	0.283285334	-50.86450195	122.0651855	29.45631024	0.462294329	326.379796	12.39	0
-0.111243652	0.221203662	-78.76050583	-0.78918457	-0.023374051	0.278213229	-16.54882813	100.2111816	23.50104848	0.4719191	332.2310461	0.78	0
0.026632093	0.288624884	18.80225779	-1.781799316	-0.221034323	0.589952907	-156.0502319	121.2852173	32.42433297	0.566150712	400.8347039	2.24	0
-0.037017949	0.278395299	-26.13467206	-1.39831543	-0.272364284	0.570646707	-192.2891846	75.03369141	17.74516015	0.44633182	315.1102647	3.13	0
-0.04527661	0.106852264	-32.01056331	-0.898681641	-0.104431411	0.341532793	-73.83300781	171.1468506	43.17052508	0.45290768	319.752822	17.68	0
0.153193003	0.21834008	107.6946812	-0.245361328	0.306806453	0.287357126	215.6849365	82.98791504	19.54204293	0.488252503	345.1945197	1.47	0
0.137547902	0.240944888	96.6961751	-0.391235352	0.194676449	0.362779642	136.8575439	129.9530029	34.21493311	0.557975276	392.2566191	12.35	0
0.077214273	0.284690759	54.28163379	-1.354858398	0.072685318	0.494348308	51.09777832	100.9927979	26.5072302	0.519163673	364.9720624	6.29	0
0.101966431	0.152655091	72.09026683	-0.30456543	0.197196648	0.200932065	139.4180298	131.8361816	32.27170292	0.453013551	318.468526	13.81	0
-0.254098765	0.406669678	-179.3937283	-2.024475098	-0.260157858	0.725523644	-183.6714478	129.7561646	35.13805869	0.524229086	370.6299638	7.23	0
0.131115598	0.163252017	92.04314971	-1.339294434	0.091393191	0.538185982	64.15802002	151.4933472	39.29500751	0.572563092	404.2295432	10.20	0
0.158048729	0.215392831	111.1082565	-0.432495117	0.191659941	0.287510292	134.7369385	89.10742188	21.02555719	0.475649848	333.906193	8.43	0
0.1393257	0.217494546	98.22461859	-1.215454102	-0.036178524	0.57404542	-25.50585938	146.472229	43.02191436	0.465121288	326.9802654	0.15	0
-0.084262683	0.316489697	-59.48945449	-1.759094238	-0.212227624	0.604024184	-149.8327026	124.8026123	35.76479158	0.385632462	271.8708859	4.74	0
0.115736466	0.180066897	81.70994483	-0.072998047	0.456977996	0.166876143	322.6264648	51.1262207	10.45641862	0.501459327	354.0302848	0.83	0
-0.034408298	0.148736234	-24.25784977	-1.105041504	-0.227707537	0.340792973	-160.5338135	68.47070313	18.87259006	0.676759889	477.7924815	0.37	0
0.024838598	0.116874318	17.43669561	-0.833374023	-0.111235964	0.404183585	-78.08764648	67.8717041	18.00802044	0.434127915	306.0601798	0.10	0
0.111291322	0.216935713	78.57167366	-0.817626953	0.028190289	0.317871891	19.90234375	116.4267578	28.16651184	0.380057109	266.8000908	8.20	0
0.155575375	0.135223822	110.1473654	-0.903686523	0.133230608	0.292851638	94.32727051	108.5310059	24.16127144	0.45485414	321.1270231	10.90	0
0.025699568	0.155315241	18.19529428	-1.743774414	-0.34356336	0.500823629	-243.2428589	61.63806152	16.62813778	0.463051309	327.8403267	0.21	0
-0.083326655	0.076228599	-58.5786384	-0.820678711	-0.054498925	0.214741335	-38.31274414	145.0269775	38.12380203	0.370385236	262.2327473	20.38	0
-0.137613425	0.405411314	-97.29269134	-1.593200684	-0.115755462	0.586447877	-81.83911133	97.35821533	24.56677923	0.521386218	366.5345113	7.30	0
-0.016890413	0.316491265	-11.94152189	-1.233764648	0.052145088	0.45027352	36.86657715	93.73449707	21.53272831	0.573422662	405.409822	6.78	0
0.008671647	0.270712835	6.104839309	-0.857421875	0.044138648	0.352681623	31.0736084	76.96142578	18.02182197	0.553171552	391.0922874	6.62	0
0.04490572	0.108610778	31.61362662	-0.932556152	-0.057080009	0.293409882	-40.18432617	61.88183594	15.18429074	0.526233785	370.4685845	2.41	0
-0.020479449	0.141698073	-14.47897038	-1.154785156	0.086640052	0.267216365	61.2545166	123.4263916	30.07101908	0.370811547	261.0513291	8.95	0
-0.035321608	0.338566712	-25.00769851	-1.07019043	0.219769322	0.589229482	155.5966797	83.67871094	19.03280145	0.559402506	395.4975718	1.83	0
0.109629546	0.405132331	77.28883008	-0.626464844	0.232442653	0.561370335	163.8720703	151.0830078	36.80769953	0.583154147	412.873136	11.88	0
-0.005137713	0.243646482	-3.632362793	-1.477905273	-0.308586844	0.505867387	-218.1708984	120.8640137	34.10509592	0.519490396	366.2407292	0.83	0
-0.118481058	0.221500569	-83.41066474	-1.610961914	-0.123360721	0.445038277	-86.84594727	123.3341064	26.19248142	0.402929581	284.8712137	11.03	0
0.130746208	0.34002951	92.5683152	-1.71081543	0.271704377	0.489921577	192.3666992	163.1517944	40.65843716	0.526080522	370.3606877	7.72	0
0.002731257	0.205410519	1.93373022	-1.227905273	-0.304044734	0.441437996	-215.2636719	91.17089844	23.45378833	0.525258744	371.8831909	1.61	0
-0.013481112	0.220225496	-9.517665065	-1.146789551	-0.3114822	0.370643084	-219.9064331	52.91998291	12.91163692	0.377292437	267.1230454	1.07	0
0.007141236	0.351091541	5.048853512	-1.579040527	-0.130702773	0.640416579	-92.40686035	127.4771729	35.53171646	0.348497809	246.0394531	4.48	0
-0.159396622	0.063151768	-112.3746188	-0.795654297	-0.240937188	0.214883987	-169.8607178	152.0367432	40.52347446	0.46637753	329.728914	17.51	0
0.099267678	0.163486389	70.18224801	-1.58972168	-0.012048184	0.518743513	-8.518066406	147.8658447	39.52174309	0.501725214	353.7162762	2.60	0
-0.143321397	0.341852227	-101.3282279	-1.188476563	-0.06312451	0.471038418	-44.62902832	87.08276367	19.76377745	0.451284046	319.0578203	6.32	0
0.002827434	0.12993586	1.99616819	-2.015258789	-0.05143379	0.928351824	-36.31225586	85.1159668	30.77866308	0.609000482	430.5633407	0.09	0
0.032767471	0.283070818	23.10106721	-1.258789063	-0.127891075	0.468658003	-90.16320801	91.29418945	24.33006373	0.42515592	300.1600796	0.09	0
0.146095246	0.314389934	102.7049576	-0.595214844	0.318668979	0.611620475	224.024292	149.7695313	43.67521597	0.387267802	273.0238007	0.35	0
-0.181055399	0.381614187	-127.2819453	-2.37677002	-0.12313413	0.513227124	-86.56329346	114.3235474	27.33195814	0.526000816	369.7785739	15.60	0
-0.054717566	0.413322568	-38.46644902	-1.826171875	-0.046435425	0.609505741	-32.644104	110.8348999	26.63827711	0.576845991	405.5227318	9.27	0
0.145911377	0.09881915	102.7216092	-1.533081055	0.050692472	0.46994263	35.6875	138.4489746	38.46121491	0.505420867	355.3108696	2.79	0
0.154509967	0.563372902	109.3930568	-1.075683594	0.423341395	0.809158796	299.725708	127.7495117	32.73280177	0.448279615	315.5888491	4.14	0
-0.065565234	0.197877939	-46.48575091	-0.888366699	-0.088303667	0.322728643	-62.6072998	39.76623535	8.293197127	0.53215415	376.7651385	0.42	0
-0.081412428	0.379468862	-57.39576195	-1.684570313	-0.265228142	0.639661091	-186.9858398	109.6765137	24.46403866	0.578498371	410.1553453	5.93	0
-0.054775419	0.249962553	-38.6714455	-0.942138672	-0.108988127	0.422325121	-76.94561768	59.76867676	16.36226923	0.473828586	334.0491534	0.59	0
0.150711838	0.131257298	106.7039814	-0.234741211	0.169534457	0.232903752	120.0303955	98.58673096	22.09931648	0.507120342	358.0269612	8.74	0
-0.009497158	0.187305079	-6.685999428	-1.406799316	-0.279187636	0.415019127	-196.5480957	84.89215088	22.20374774	0.491210432	347.7769857	0.86	0
0.002564263	0.191383232	1.812933679	-1.426147461	-0.235100257	0.489759687	-166.2158813	68.94104004	18.26204918	0.329644147	232.0694793	0.87	0
-0.174578364	0.105323288	-122.9031685	-0.588745117	-0.219071995	0.149155018	-154.2266846	114.0975342	28.30356848	0.395915047	279.9119383	16.85	0
0.043901159	0.084235854	30.81861391	-1.229431152	0.075054114	0.337869741	52.68798828	125.7088623	33.06911879	0.507294307	357.1351921	10.94	0
-0.069070967	0.153035244	-48.48781854	-1.991821289	0.005733479	0.551901429	4.024902344	156.5119629	42.02763204	0.502929026	353.0561764	9.54	0
-0.11881831	0.146340844	-83.88572663	-0.697875977	-0.172850525	0.236237723	-122.0324707	120.8939209	31.17228985	0.545445404	382.9026734	16.52	0
0.052123613	0.136260557	36.79927058	-0.947631836	0.037368904	0.284089293	26.38244629	158.6036377	41.62119072	0.495905135	350.1090253	18.94	0
-0.222811224	0.396576531	-156.6362904	-1.86706543	-0.368802023	0.675392717	-259.2678223	108.7561035	25.518521	0.486689377	343.6026998	7.84	0
-0.093243076	0.349206035	-65.54988231	-1.471923828	-0.155020615	0.505800852	-108.9794922	110.7258301	28.45819329	0.512210036	360.0836554	8.84	0
0.013361562	0.205494752	9.43326264	-1.628295898	-0.200729759	0.435422665	-141.71521	113.8036499	31.16647921	0.500695176	351.988709	2.14	0
0.043781033	0.082153891	30.9969715	-1.302856445	0.067000739	0.287353007	47.43652344	168.6925049	43.15513001	0.406921624	287.2866664	21.00	0
-0.068139232	0.256405817	-48.1062977	-1.032104492	-0.042752966	0.390493085	-30.18359375	95.65106201	26.2133314	0.500551082	354.3901664	8.56	0
-0.178292279	0.159741268	-125.5177645	-0.99206543	-0.216753873	0.333309741	-152.5947266	119.7172852	29.00637713	0.546037204	385.5022663	16.32	0
-0.021425147	0.137465074	-15.12615387	-1.299560547	-0.332189025	0.359360737	-234.5254517	52.18695068	12.54413413	0.51215712	360.5586124	0.75	0
0.014416407	0.256034285	10.19239986	-1.470947266	-0.238244991	0.504351046	-168.439209	86.92572021	23.24210778	0.410580065	289.8695259	2.18	0
0.021269938	0.279934792	14.9740367	-1.260009766	-0.183093158	0.515844038	-128.897583	105.5535889	28.0664787	0.418879673	296.1479292	3.92	0
0.102619923	0.146260815	72.24442588	-0.974304199	-0.084145026	0.429729216	-59.23809814	91.62939453	27.28370035	0.429805669	302.5831912	0.23	0
0.112791348	0.093316929	79.63069189	-0.284179688	0.14374298	0.191879691	101.4825439	166.1025391	42.69507697	0.382213042	269.0779818	18.68	0
-0.020291885	0.088190641	-14.34636301	-0.469970703	0.031091153	0.173463112	21.98144531	112.0949707	28.55129653	0.485040167	342.4383578	13.64	0
0.14922434	0.292968259	105.2031598	-1.582275391	0.028315637	0.653576192	19.96252441	125.3499756	33.22455058	0.534753243	378.0705428	3.69	0
0.028616592	0.429754091	20.20331407	-2.104064941	-0.220746092	0.770626136	-155.8467407	83.90618896	20.80780729	0.457636595	322.6337992	2.57	0
0.150976522	0.169946879	106.5894244	-0.953613281	0.038294979	0.451127569	27.03625488	112.0424805	30.60451165	0.452565269	319.5110796	4.30	0
0.169463995	0.145034881	119.4721162	-0.069091797	0.322503705	0.157210577	227.3651123	78.77832031	18.33613823	0.411750776	290.6960476	7.13	0
0.338086065	0.223075571	238.6887619	-0.564819336	0.399135514	0.476375544	281.7896729	131.4338379	35.78525402	0.556493686	392.3280483	0.57	0
0.058032164	0.256969209	40.73857894	-1.291748047	-0.066966	0.413476984	-47.01013184	101.376709	26.86413901	0.488256075	344.708789	3.64	0
0.077188898	0.311670501	54.495362	-0.641845703	0.249330169	0.436460405	176.0270996	105.651001	29.07689935	0.432094001	303.3299886	0.38	0
0.17511916	0.114745744	123.9843653	-0.674804688	0.226953366	0.227663919	160.6829834	94.4732666	23.25746077	0.589329383	416.0665445	13.58	0
0.10309613	0.24042308	72.37348353	-2.174926758	-0.114323543	0.418944143	-80.25512695	69.13391113	13.91924302	0.474500047	335.9460329	1.33	0
0.069150656	0.36225921	48.68206148	-1.220825195	0.171020855	0.567212577	120.3986816	104.119873	28.15391437	0.29254368	205.3656637	2.74	0
0.103278759	0.235275022	73.01808289	-0.807861328	0.061763003	0.342758671	43.66644287	149.7954102	38.0114915	0.539383292	379.7258376	18.75	0
-0.133172846	0.383048733	-93.75368333	-1.800170898	-0.118322026	0.586878659	-83.29870605	129.9575806	33.37811864	0.44587715	315.2351451	9.42	0
0.029976176	0.278618916	21.04327528	-0.741943359	0.154873666	0.351637875	108.7213135	95.98803711	18.49192715	0.557527441	392.4993186	0.68	0
0.015395022	0.088707985	10.86888572	-0.748352051	-0.131310741	0.238898544	-92.7053833	34.37561035	6.690155285	0.529546795	371.7418503	0.02	0
0.300761401	0.210956246	212.6383106	-1.077758789	0.28957409	0.375759233	204.7288818	150.1982422	38.06743327	0.348654808	246.1502947	22.03	0
-0.105299444	0.294550491	-74.44670698	-1.099487305	-0.183619304	0.36136715	-129.8188477	99.37841797	24.3618247	0.45539164	321.9618898	13.02	0
0.006044935	0.241890772	4.255634525	-1.207275391	-0.030576186	0.383588764	-21.52563477	122.6103516	29.38642135	0.51291808	362.6330826	9.15	0
0.034610707	0.105488154	24.46976985	-0.802734375	0.035988642	0.2736823	25.44396973	117.8773193	29.66729803	0.485152946	341.5476737	11.02	0
-0.088075787	0.074077196	-61.91727801	-0.496704102	-0.075896479	0.165683671	-53.35522461	117.3974609	29.26336612	0.496650578	351.1319589	17.18	0
0.15823034	0.256863214	111.0776986	-0.263916016	0.400698409	0.512318157	281.2902832	76.42431641	20.19034218	0.526273678	369.9703954	0.91	0
0.006659298	0.053254175	4.681486659	-0.314025879	-0.014468805	0.103747088	-10.17156982	15.96661377	3.686352433	0.544127019	381.9771673	0.81	0
-0.019408513	0.160231006	-13.76063545	-1.15838623	-0.41581909	0.354642209	-294.8157349	78.08111572	19.45315107	0.361235121	253.94829	0.61	0
-0.20530245	0.158509184	-144.5329246	-0.999511719	-0.291416342	0.30535644	-205.1571045	167.298584	43.46099981	0.351356519	249.1117721	19.28	0
0.071572562	0.164482116	50.24393868	-1.179748535	-0.005220853	0.409363256	-3.665039063	159.7582397	39.98972453	0.506176811	356.3484751	13.18	0
0.060717266	0.372385772	42.80567285	-0.829345703	0.170349208	0.65401543	120.0961914	139.1221924	38.3098735	0.451278564	316.7975517	1.93	0
0.004177402	0.140540039	2.936713511	-0.551147461	0.177885096	0.402198493	125.0532227	41.73046875	11.43776113	0.504295643	355.5284282	0.38	0
0.113229527	0.142874187	80.05327593	-0.514160156	0.127345926	0.210687497	90.03356934	158.1135254	38.73608488	0.605710368	425.8143884	21.70	0
0.248556895	0.189256165	175.7297249	-0.619018555	0.431350212	0.235316736	304.9645996	93.67871094	23.25213612	0.476053395	336.5697502	3.14	0
0.004080178	0.216748667	2.880605651	-1.425537109	-0.29832653	0.45715438	-210.6185303	69.98474121	16.8272521	0.54774647	387.256754	0.36	0
0.01858599	0.293985989	13.08453719	-0.695068359	0.317462228	0.500711939	223.4934082	111.0200195	29.78555101	0.376842588	266.0508668	1.57	0
0.114872452	0.409289936	81.09995107	-0.801025391	0.36584075	0.823183346	258.2835693	121.8603516	30.40545399	0.615233801	433.1245962	0.99	0
0.121209574	0.093568048	85.69516912	-0.42980957	0.137096356	0.23355271	96.92712402	134.4923096	31.52009253	0.481690443	340.0734527	16.55	0
-0.021914494	0.275604674	-15.51546168	-1.925964355	-0.217505245	0.72710242	-153.9937134	104.2492065	29.64499759	0.478766055	338.4876009	1.28	0
0.310300436	0.335787586	219.6927088	-0.877441406	0.302941963	0.548853215	214.4829102	147.5614014	37.77092335	0.502496833	355.767758	10.61	0
-0.026188244	0.184174729	-18.38414761	-0.54309082	0.207782104	0.385648781	145.8630371	132.2572021	36.08807798	0.446580024	316.1786567	0.31	0
-0.190790581	0.198302617	-135.0797314	-1.063476563	-0.198309602	0.294287853	-140.4031982	86.51379395	21.96682862	0.602936316	423.2612936	11.15	0
-0.106815899	0.212483286	-75.19839278	-1.091552734	-0.255754297	0.307620731	-180.0510254	128.6224365	32.98890389	0.536328972	379.7209122	10.94	0
0.029191365	0.220129678	20.63829498	-0.572875977	0.22551273	0.45738864	159.4375	105.5390625	29.52152681	0.452513991	318.5698495	0.59	0
0.163645016	0.354415315	115.5333812	-0.624511719	0.399152113	0.574457878	281.8013916	77.91333008	20.10488078	0.54280103	383.7603283	2.43	0
0.030361575	0.090314156	21.43527195	-0.857055664	-0.150708769	0.221872694	-106.4003906	41.9989624	9.254859714	0.536074915	378.4688901	0.10	0
0.052712915	0.150871173	37.26803101	-0.916625977	0.117693738	0.359683683	83.20947266	156.2973633	39.9814756	0.328496468	231.9185062	7.72	0
0.131750255	0.365482727	92.48867888	-0.723999023	0.31628018	0.50147098	222.0286865	111.3199463	24.86886487	0.504803715	356.8962263	4.76	0
-0.131472282	0.385087173	-92.95090331	-1.404968262	-0.248912417	0.517181524	-175.9810791	108.1729126	25.1012605	0.539984037	379.068794	11.51	0
0.187292749	0.262756372	132.7905594	-0.55847168	0.369197786	0.328942355	261.7612305	102.4786377	24.8847406	0.488937689	345.6789458	7.92	0
0.197264678	0.222894979	139.4661272	-0.544189453	0.462384128	0.244163445	326.9055786	90.04772949	22.45429067	0.548212243	388.6824802	1.25	0
0.054420675	0.142868096	38.47541699	-0.718383789	0.099226416	0.28038838	70.15307617	132.8371582	35.34237396	0.597977533	422.7701161	11.86	0
0.001865076	0.234563473	1.316743563	-0.652832031	0.357024368	0.411407576	252.0592041	62.21960449	16.35541059	0.513160803	362.8046878	0.26	0
0.126700816	0.177777882	89.4507758	-1.302429199	0.107739846	0.455805018	76.06433105	108.3827515	30.25726577	0.65155835	460.0001951	2.29	0
0.016143807	0.311664299	11.39752759	-1.599365234	-0.075533686	0.467028067	-53.32678223	56.26342773	11.74492505	0.48366792	341.4695516	0.49	0
-0.127521387	0.174321486	-90.15762094	-0.727050781	-0.080576593	0.416959275	-56.96765137	130.4570313	36.29198723	0.467312242	329.922443	4.41	0
-0.002071867	0.052927954	-1.456522673	-0.386230469	-0.011445524	0.131651822	-8.046203613	8.367675781	2.816169361	0.543466659	384.2309282	0.03	0
0.020974923	0.530097735	14.82927075	-1.802246094	-0.262878159	0.858063748	-185.8548584	99.58587646	26.60336697	0.530488626	372.9335043	0.41	0
0.050428182	0.12991539	35.70315303	-0.804321289	0.014868095	0.296577833	10.52661133	145.3458252	36.83076931	0.45656965	322.7947422	18.08	0
0.061880729	0.131096419	43.50215277	-0.858276367	-0.090528073	0.321817672	-63.64123535	120.2830811	33.36255664	0.479284661	339.3335399	4.49	0
0.216838074	0.093404311	153.0876801	-0.243652344	0.429621278	0.370947504	303.3126221	154.3500977	37.73274077	0.415875346	292.3603684	7.91	0
0.021907876	0.161037653	15.4669603	-1.176208496	-0.169493246	0.277443152	-119.6622314	50.92767334	11.19333319	0.536927313	379.0706831	0.19	0
0.125862774	0.070891131	88.98498094	-0.169555664	0.147405255	0.159148432	104.2155151	94.23748779	24.02691792	0.280629512	198.1244357	13.61	0
0.136800532	0.252048885	96.17077393	-0.58984375	0.134720999	0.376398367	94.7088623	107.5366211	21.88079665	0.492988181	348.5426438	7.40	0
0.061433952	0.129256765	43.43380374	-0.438110352	0.308936825	0.319469367	218.418335	48.61889648	11.37912232	0.473884579	333.1408592	0.50	0
0.056202765	0.34796773	39.73535481	-0.765991211	0.221877037	0.563870514	156.8670654	133.8358765	38.60597315	0.617853929	436.8227281	1.62	0
-0.228488847	0.326126588	-161.0846373	-1.573608398	-0.451873043	0.463556188	-318.5704956	90.62518311	22.25254516	0.566413186	400.4541222	4.33	0
0.076345969	0.243373073	53.74756218	-1.79699707	-0.264100508	0.595425814	-185.9267578	82.63616943	21.48079556	0.466554609	328.9209995	0.05	0
-0.018873421	0.252096361	-13.26801496	-1.766479492	-0.284517768	0.662903745	-200.0159912	77.88751221	20.05590136	0.373868488	263.2034156	2.14	0
0.09043547	0.330430653	64.02831247	-0.543457031	0.276258221	0.485579157	195.5908203	133.3143311	34.8136187	0.457050447	321.3064643	9.52	0
0.004092928	0.089908337	2.87732824	-1.065856934	0.069622968	0.307705825	48.94494629	155.6959839	37.79561002	0.554157447	392.3434725	21.55	0
0.042462908	0.207361486	30.02127621	-0.612670898	0.023713583	0.253217231	16.76550293	92.47436523	20.77052308	0.512351643	360.1832051	9.43	0
0.048071244	0.316885124	33.74601337	-1.760742188	-0.335005192	0.580145786	-235.173645	68.50634766	16.38704109	0.49162049	347.5756867	0.84	0
0.031442712	0.329671867	22.10422651	-1.107055664	-0.034098336	0.400714231	-23.97113037	154.7730713	36.39993375	0.350956406	246.3713971	19.50	0
0.047717863	0.395939652	33.54565735	-1.214233398	0.100710699	0.501985346	70.79962158	123.1202393	31.05097701	0.467114873	328.3817559	13.33	0
-0.016699115	0.213780292	-11.78957487	-1.034301758	-0.279508769	0.343717082	-197.3331909	58.11676025	12.93578007	0.519053952	364.8949284	1.74	0
0.18997308	0.174939134	133.5510755	-0.80078125	0.135452205	0.28411869	95.22290039	134.2965088	32.86392664	0.392982434	277.4455982	18.51	0
-0.103407272	0.259305898	-72.59190492	-0.956054688	0.028412474	0.35400684	19.94555664	79.0012207	19.77492428	0.448685924	315.4262048	0.39	0
-0.021990881	0.147067992	-15.52556192	-1.493041992	-0.363882092	0.401466287	-256.9007568	53.6038208	14.2147487	0.615440213	432.0390296	0.62	0
0.283796333	0.257749362	200.6440077	-0.83001709	0.311522833	0.352002982	220.2466431	147.4301758	37.12472825	0.352107863	248.5881514	20.44	0
0.216919037	0.244161692	152.2771643	-1.230529785	0.210219859	0.484201267	147.5743408	120.2070923	31.21931546	0.465543595	329.1393214	12.70	0
0.056754075	0.194871537	40.35214767	-0.987976074	-0.121292565	0.44278476	-86.23901367	109.9398804	31.89020514	0.467625946	328.2734138	1.07	0
0.108152864	0.194100459	76.0314634	-1.239135742	-0.058956054	0.450181937	-41.44610596	104.3869019	29.79052873	0.372081307	264.5498092	1.65	0
0.145912262	0.45435792	102.7222322	-1.465148926	0.293960831	0.600752751	206.9484253	97.121521	26.25928037	0.374682935	263.4021035	7.27	0
-0.195679024	0.399305505	-137.5623538	-1.916259766	-0.437840599	0.563188638	-307.8019409	86.32330322	22.19976651	0.558890337	393.4587974	3.76	0
0.068257924	0.25300729	48.3948683	-1.186279297	-0.043037791	0.451943544	-30.51379395	112.3582153	31.17350407	0.467745318	328.8249582	1.30	0
0.093961073	0.118689695	66.43047868	-0.556152344	0.038167951	0.287187048	26.98474121	148.5064697	37.31627957	0.436598537	309.5483628	19.46	0
0.00957609	0.092567089	6.770295954	-1.0390625	-0.137174226	0.258597199	-96.98217773	39.36132813	6.514541125	0.4693036	331.7976454	1.05	0
0.075941617	0.156487694	53.38695703	-0.703613281	0.11752315	0.221987913	82.61877441	97.63903809	24.47740685	0.363778775	257.1915942	12.89	0
-0.034576186	0.216907424	-24.37621112	-1.258605957	-0.24023273	0.42581837	-169.3640747	86.62988281	23.37471535	0.515816421	362.6189442	3.18	0
0.013044036	0.132613776	9.196045724	-0.758300781	-0.070805543	0.204395187	-49.91790771	102.2487183	25.42619557	0.443387207	312.5879808	9.51	0
-0.159669782	0.384908642	-112.0881869	-2.004577637	-0.262529509	0.503604076	-184.2957153	98.81274414	22.88345066	0.478030794	337.0117097	6.27	0
0.003915622	0.174438321	2.768344818	-0.474487305	0.163092671	0.339516984	115.3065186	55.25646973	13.10954317	0.512758188	359.9562477	0.56	0
-0.024121953	0.071786897	-16.9336108	-1.444885254	-0.266730414	0.425667286	-187.244751	88.38122559	21.51064813	0.579291313	409.5589586	0.47	0
-0.045759645	0.200560943	-32.30630909	-0.782836914	0.058551216	0.300698598	41.3371582	96.50952148	26.15481982	0.336137276	235.968368	4.54	0
0.208337973	0.13428523	147.0866087	-1.079650879	0.202789825	0.287528167	143.1696167	117.6803589	30.23034872	0.588032829	415.1511776	18.01	0
0.071749374	0.290581565	50.79855647	-0.746704102	0.051010218	0.442702638	36.11523438	161.0004883	44.17115045	0.449569942	317.3963793	17.28	0
0.100862538	0.192161415	71.5115396	-0.591796875	0.3592593	0.267593224	254.7148438	112.5852051	30.21518209	0.490168514	347.0393079	3.00	0
-0.056738831	0.270909868	-39.83065951	-1.088378906	-0.152634667	0.400680584	-107.1495361	99.04858398	24.71465628	0.60891564	431.7211884	11.98	0
-0.072626246	0.381390353	-51.27412975	-1.377868652	-0.158920158	0.548163758	-112.1976318	194.9016724	52.64336125	0.472322662	331.5705085	14.91	0
0.326646207	0.452985971	230.9388684	-1.839599609	0.44975952	0.801740917	317.9799805	77.83520508	21.61740733	0.463198368	327.0180478	2.54	0
-0.128576002	0.198395071	-91.03180964	-1.872192383	-0.413225077	0.427972388	-292.5633545	82.1809082	20.79888348	0.495990203	350.6650734	3.17	0
-0.092110003	0.132485648	-64.75333183	-1.088989258	-0.245115972	0.307942395	-172.3165283	157.4299316	39.73741767	0.344462612	243.8795295	12.33	0
0.233098715	0.269248981	164.3345942	-0.83190918	0.112097428	0.387675142	79.02868652	121.0922852	29.85852818	0.476569381	335.0282747	10.96	0
0.233475995	0.329303301	165.0675287	-0.482543945	0.231755582	0.45352825	163.8511963	150.3928223	36.32811773	0.391354862	275.9051777	16.20	0
0.236533078	0.344733495	166.9923529	-0.908447266	0.321120654	0.619148958	226.7111816	119.5524902	31.13682443	0.463329498	327.5739552	7.25	0
0.214406219	0.164502936	151.3707909	-0.705993652	0.284488321	0.416603324	200.8487549	147.020752	41.72474474	0.485853724	343.0127294	2.18	0
0.040258964	0.340451569	28.34231065	-1.365478516	-0.078773499	0.547860545	-55.45654297	81.07263184	19.01194704	0.496008962	350.1823268	4.14	0
-0.032086677	0.061784261	-22.52484709	-0.809326172	-0.122299673	0.336018965	-85.85437012	135.3959961	31.76308632	0.428252927	301.4900605	14.36	0
-0.028497432	0.202592589	-20.09068944	-0.395385742	0.295541057	0.299992839	208.3564453	94.76635742	22.86685857	0.461056388	323.6615841	0.77	0
-0.107745733	0.346816448	-76.17623292	-1.180297852	-0.131673638	0.481893401	-93.09326172	190.0223389	48.81289697	0.626860663	441.9367678	19.49	0
0.018834746	0.211572337	13.3538349	-0.792602539	0.09497604	0.339898541	67.3380127	103.5472412	26.138758	0.51074748	361.0984681	4.84	0
0.201441708	0.114357499	142.2178459	-0.815246582	0.264703853	0.256399304	186.8809204	95.77655029	24.79486915	0.550866862	390.5646052	12.65	0
-0.007603978	0.186641173	-5.337992381	-1.379760742	-0.097870482	0.329249709	-68.70507813	133.3833008	33.62464607	0.488687096	345.0130898	13.63	0
-0.024655888	0.270068073	-17.30843328	-2.641967773	-0.467023453	0.760782879	-327.8504639	97.72729492	25.18868423	0.466398658	327.4118577	1.68	0
0.049165389	0.264581847	34.66159909	-2.432250977	-0.192499255	0.405903789	-135.7119751	134.4025879	36.01254128	0.402294489	282.410731	1.67	0
-0.005047387	0.155950534	-3.593739882	-1.83782959	-0.212969491	0.545366673	-151.6342773	126.3671875	35.25684535	0.366137648	258.1270421	0.97	0
-0.005025232	0.055836655	-3.547814117	-0.380554199	0.041172017	0.143754531	29.06744385	12.39678955	2.527715598	0.456857951	325.2828614	0.02	0
-0.078531759	0.111366494	-55.67901746	-1.303588867	-0.120285744	0.249187887	-85.28259277	134.1916504	35.36433626	0.569231309	401.8773043	17.54	0
0.012251886	0.227722702	8.662083175	-0.707397461	0.124988	0.355419337	88.36651611	132.9691162	36.13860955	0.496534771	352.0431524	7.11	0
-0.056706516	0.234658593	-39.92138714	-1.134643555	-0.072963801	0.343324892	-51.36651611	72.29406738	16.55327123	0.567434263	401.176024	2.85	0
-0.022293783	0.199346806	-15.69482306	-0.982543945	-0.116394737	0.309298595	-81.94189453	61.50952148	13.11746685	0.523072416	368.2429808	0.39	0
-0.009504928	0.089733549	-6.710479206	-1.090026855	-0.358914989	0.307635989	-253.3939819	76.58123779	19.27503485	0.446971909	314.668224	0.02	0
-0.105949445	0.309611768	-74.90625769	-1.549682617	-0.361411174	0.537176444	-255.5177002	68.90307617	16.83989558	0.308474971	217.7833297	3.85	0
0.038813629	0.374004578	27.32479454	-1.004394531	0.170862718	0.45538233	120.2873535	108.6911621	26.26914204	0.456552542	322.7826469	5.83	0
0.065437143	0.210897063	46.13318585	-0.418579102	0.239002071	0.298034217	168.49646	47.06018066	10.88821934	0.559360036	393.7894653	1.06	0
0.023878448	0.340143691	16.81042754	-1.780456543	0.049299587	0.510532577	34.70690918	123.758667	29.65034321	0.585038215	412.4519418	12.32	0
-0.018494919	0.032942204	-13.0574127	-0.413085938	0.04802049	0.204640828	33.90246582	95.1940918	24.66999887	0.517252853	364.1460085	5.91	0
-0.084299733	0.659400545	-59.6842112	-2.134155273	-0.035264786	0.90179767	-24.96746826	155.5615234	38.38881354	0.538701156	380.3230158	14.77	0
0.041983055	0.358649421	29.72400295	-0.89050293	0.111012432	0.518812039	78.59680176	115.3358154	31.40161019	0.540111664	382.3990578	5.68	0
0.094162503	0.490598164	66.66705215	-0.972290039	0.480464957	0.798408876	340.1691895	97.87219238	24.19613941	0.523645249	370.7408366	1.11	0
0.005727102	0.171833168	4.060515043	-1.709411621	0.122181794	0.424123086	86.62689209	152.531189	38.24227901	0.561203379	397.3319926	3.80	0
-0.261892256	0.455709946	-184.6340408	-2.41607666	-0.313867361	0.666912366	-221.2764893	126.4937134	34.29668415	0.52994572	375.7315152	7.23	0
-0.295871842	0.268374895	-207.997905	-1.83972168	-0.315286607	0.361002101	-221.6464844	135.72052	30.77903758	0.549236298	387.2115901	17.29	0
-0.093815451	0.205033086	-66.32752421	-1.899169922	-0.179869138	0.471463581	-127.1674805	127.5666504	28.2920247	0.542193641	381.1621296	10.40	0
-0.081062894	0.09464404	-57.14934032	-0.709228516	-0.265438172	0.214394097	-187.1339111	72.32141113	17.67481355	0.501472402	354.5409883	0.14	0
0.152568915	0.114474829	107.8662228	-0.862731934	0.076057402	0.405557259	53.77258301	123.4187012	33.71225343	0.381717013	269.1104944	7.34	0
0.044024225	0.330221501	30.90500627	-1.47076416	-0.193120103	0.487252866	-135.5703125	90.44488525	22.51612037	0.439904165	311.0122447	1.39	0
0.166608933	0.245367108	117.7925154	-0.535522461	0.111718163	0.40747002	78.98474121	158.7644043	42.24142275	0.393213686	276.0360073	16.01	0
0.001751159	0.043587238	1.232816198	-0.261901855	0.005029765	0.086664444	3.54095459	4.085998535	1.181748768	0.458195198	323.944005	0.07	0
-0.241466126	0.131759145	-170.2336191	-1.21496582	-0.233806724	0.341844381	-164.8337402	142.9390869	38.15102832	0.538120908	378.837119	13.85	0
-0.160002553	0.109585669	-112.3217925	-0.674316406	-0.29204192	0.177045972	-205.0134277	118.5938721	29.57461189	0.534659508	376.9349532	12.55	0
-0.004682162	0.043097769	-3.310288551	-0.29864502	-0.009367645	0.093144312	-6.622924805	5.975585938	1.489667722	0.48133888	337.8998936	0.05	0
0.067599434	0.236579639	47.79279951	-0.71081543	0.033320879	0.355343838	23.55786133	140.645874	32.84684878	0.518141294	366.3258947	17.31	0
0.199379524	0.509433312	140.3631848	-1.445678711	0.174494657	0.746690157	122.8442383	158.743042	41.4145159	0.478832138	338.5343218	15.84	0
0.001210657	0.087848794	0.85472418	-0.771728516	-0.190989032	0.2510385	-134.8382568	123.2110596	32.71013927	0.455560751	320.7147684	3.76	0
0.1675014	0.284652825	118.4234899	-0.306884766	0.329610045	0.344090885	233.0343018	100.9085693	23.04430294	0.393581258	277.8683681	4.32	0
0.223106383	0.184054169	156.8437871	-0.364135742	0.317729576	0.252820034	223.3638916	110.885498	29.24455393	0.600839621	424.7936119	15.37	0
-0.247297843	0.163623118	-174.5922768	-1.15234375	-0.340387706	0.236057917	-240.3137207	109.5327759	26.04255106	0.548141452	387.5360064	12.68	0
0.037123234	0.276094624	26.24612614	-0.513671875	0.577670905	0.517613475	408.4133301	108.1019287	29.70635519	0.508276947	357.3186936	0.81	0
0.160467567	0.331983785	113.2901021	-0.662719727	0.46732406	0.444609318	329.9307861	68.26281738	18.39721716	0.512791364	362.0307031	1.51	0
-0.156738725	0.208003804	-110.6575401	-1.078735352	-0.070475376	0.380787379	-49.75561523	111.7855225	29.28439159	0.621935011	439.7080529	3.68	0
-0.186532105	0.292247218	-131.8781981	-1.123657227	-0.174178451	0.384293671	-123.144165	87.59454346	21.66884904	0.604444991	426.7381638	10.65	0
0.001067777	0.16133545	0.753850293	-1.120910645	-0.2872311	0.414419979	-202.7851563	81.52490234	21.86455992	0.580809712	410.0516566	1.62	0
0.264905289	0.234551267	187.0231344	-0.452392578	0.410988783	0.367218232	290.1580811	93.64660645	22.92202035	0.580439449	410.3706903	5.24	0
-0.132567719	0.309492523	-93.06253904	-1.415893555	-0.18942965	0.412946421	-132.9796143	121.663208	30.73310967	0.352810483	249.0842009	15.39	0
0.07244901	0.088228019	50.85920524	-1.093078613	0.091073495	0.301185769	63.93359375	129.4675293	31.71602453	0.518295922	365.9169211	16.32	0
-0.091052266	0.120256397	-64.37395191	-0.685058594	-0.069823873	0.209796373	-49.36547852	92.06481934	23.13212728	0.493290906	346.2902159	13.13	0
0.093503077	0.105557751	66.01317224	-1.061340332	-0.023652333	0.421004911	-16.69854736	75.00622559	20.56317629	0.478325077	335.7842039	0.04	0
0.140671149	0.260993091	98.75114665	-1.003662109	0.139528454	0.412600338	97.94897461	128.0640869	33.13891442	0.528087379	373.3577771	13.53	0
-0.046891312	0.168355156	-33.05837517	-1.156616211	-0.150970675	0.308004752	-106.4343262	142.1777344	34.9509716	0.3713687	262.1863023	13.05	0
-0.119746361	0.233607311	-84.90016973	-1.374267578	-0.376305584	0.402826586	-266.8006592	65.11279297	15.49943768	0.494164506	346.9034831	0.87	0
-0.057962687	0.132696156	-40.92165709	-0.742675781	-0.000553466	0.433351727	-0.39074707	143.8879395	38.58497093	0.476833599	336.1676876	7.09	0
0.006715312	0.09648431	4.741010098	-0.887084961	0.021691168	0.268467572	15.31396484	171.4172363	45.90589439	0.446114212	316.2949765	20.98	0
-0.000586973	0.058023213	-0.41205511	-0.720336914	-0.141169274	0.23464549	-99.10083008	23.79577637	3.754182533	0.527387214	372.3353731	0.08	0
0.064665166	0.311277307	45.97693315	-0.912963867	-0.085490338	0.413357923	-60.78363037	120.1100464	28.79636474	0.498354591	351.8383411	7.86	0
0.044346054	0.211941016	31.39700653	-0.632446289	0.017592436	0.285239307	12.45544434	108.6035156	25.63297432	0.413057847	289.9666084	7.38	0
-0.077934722	0.168427341	-54.71017475	-1.167236328	-0.016974555	0.336839541	-11.9161377	128.8930664	34.64031756	0.416907836	296.4214715	7.68	0
-0.126958791	0.194205315	-89.75986523	-1.01965332	-0.185308259	0.364385329	-131.0129395	161.9182129	45.8718875	0.485604208	343.8077795	15.95	0
-0.042154424	0.303980428	-29.59240582	-1.615783691	-0.458368198	0.551459051	-321.7744751	87.05407715	21.84144212	0.547381106	384.2615366	0.33	0
0.060788511	0.291497889	42.97747696	-0.611694336	0.327174509	0.41085868	231.3123779	74.51928711	18.20465398	0.501377779	354.47409	0.71	0
0.169522959	0.189596884	119.8527324	-0.777099609	0.244280911	0.343885012	172.706604	148.3250122	38.09056056	0.381083486	267.5206074	15.05	0
-0.071612181	0.510751648	-50.27175101	-2.088134766	-0.084641938	0.714230452	-59.41864014	137.4383545	33.14052378	0.632999745	447.5308197	12.49	0
-0.162749013	0.210916815	-114.9008035	-0.967529297	-0.025651537	0.523242099	-18.10998535	136.1156006	35.66286137	0.499989067	353.4922703	1.22	0
0.028388577	0.33654173	20.04233505	-0.617919922	0.513053916	0.705937747	362.2160645	102.6761475	25.38648617	0.535686866	376.0521802	1.37	0
0.051304215	0.110692963	36.11816745	-0.597290039	0.111981132	0.328251259	78.8347168	39.484375	12.73644372	0.551558266	389.4001359	0.12	0
-0.016056523	0.325738817	-11.35196195	-1.523925781	-0.255333627	0.501104523	-180.520874	93.28417969	20.77903313	0.576983842	407.3505927	1.71	0
0.171902921	0.158090623	120.8477534	-0.38671875	0.362164211	0.327553846	254.6014404	107.9165039	31.31210101	0.562978653	396.3369715	0.70	0
0.139672118	0.218279749	98.18949922	-0.4375	0.295315174	0.319918621	207.6065674	100.6795654	24.65325878	0.400363357	283.0568936	5.19	0
-0.053735373	0.235837074	-37.99090893	-0.680908203	-0.062163487	0.306054888	-43.94958496	48.49993896	10.61315232	0.587306504	412.8764723	0.75	0
-0.320778703	0.286366426	-226.7905434	-1.831481934	-0.284479252	0.447084059	-201.1268311	128.0330811	32.35537379	0.546067998	383.8858027	14.36	0
0.08856638	0.306309453	62.35073155	-0.883544922	0.133777965	0.339801727	94.1796875	117.7231445	26.75476739	0.519653437	367.3949802	8.59	0
0.039733693	0.447888906	28.01225327	-1.845947266	-0.088471281	0.710337646	-62.37225342	101.3908081	23.81895713	0.581253974	410.9465593	7.86	0
0.078530481	0.365527472	55.44251993	-1.229858398	0.120254646	0.611413744	84.89978027	123.0834961	33.74455775	0.508185557	357.7626319	9.93	0
0.028240982	0.151262955	19.8251697	-0.727172852	0.060055116	0.314952543	42.15869141	167.472168	44.26439596	0.471265845	332.2424206	16.79	0
-0.007664833	0.382909439	-5.396042568	-1.64630127	-0.248650204	0.580458638	-175.0497437	76.36743164	18.42329968	0.497164539	350.9981649	1.71	0
-0.081404463	0.418244601	-57.552955	-1.957397461	-0.424043	0.752015434	-299.7984009	110.6600342	30.13468559	0.503630485	353.5486003	2.27	0
0.086501335	0.331752732	60.89693954	-0.838745117	0.312722986	0.465078581	220.1569824	61.65283203	15.32218187	0.398790569	280.7485603	2.22	0
0.000527243	0.019434942	0.372760579	-0.152526855	-0.015920852	0.039779913	-11.25604248	5.199157715	1.249282446	0.453248129	320.4464269	0.01	0
0.191773462	0.142620206	135.2002904	-1.923950195	0.130939716	0.486054708	92.3125	163.3890991	42.75696446	0.61828922	435.2756106	8.16	0
0.183872851	0.30997703	129.4464868	-0.919555664	0.299821247	0.453625436	211.0741577	178.3760376	45.09953519	0.443617147	313.6373231	11.85	0
0.257817228	0.201101891	180.9876939	-0.305664063	0.384369505	0.265978942	269.8273926	133.8344727	34.33162142	0.466213243	328.6803361	11.36	0
0.031313151	0.39198216	21.98183168	-1.847045898	-0.28804803	0.714406129	-202.2097168	84.57067871	20.96231745	0.513726687	361.6635877	3.04	0
-0.007363034	0.318755458	-5.183576065	-0.770996094	0.326414282	0.507888063	229.7956543	72.64624023	17.77409659	0.51382983	360.7085404	0.73	0
0.022039022	0.100398773	15.53751022	-2.092407227	-0.055664928	0.69205265	-39.24377441	144.3137207	37.54544508	0.383379619	269.1324928	6.95	0
-0.041386106	0.294701606	-29.05304616	-1.606628418	-0.360221145	0.607394055	-252.8752441	78.98303223	18.9256167	0.601807043	423.6721584	2.23	0
0.000398883	0.163264394	0.282408996	-0.340576172	0.237969522	0.30032131	168.4824219	97.07849121	25.50189512	0.457387324	322.4580635	0.45	0
-0.043390921	0.38489209	-30.63399006	-1.663818359	-0.254867165	0.646662285	-179.9362183	106.2649536	27.78883946	0.422024824	296.2614265	0.88	0
0.141013511	0.197364698	99.13249857	-0.855834961	0.131880216	0.369908313	92.71179199	166.4875488	41.9105256	0.587098045	415.6654161	21.92	0
0.168176078	0.229854141	119.0686629	-1.327575684	-0.064284675	0.552564146	-45.5135498	134.2386475	37.62251689	0.456320035	322.161945	1.19	0
-0.082098233	0.464750201	-57.87925396	-1.802978516	-0.129668107	0.577360795	-91.41601563	122.1595459	29.36670532	0.479370005	336.9971134	13.18	0
-0.005477082	0.04051362	-3.8613427	-0.606079102	-0.022335144	0.19235821	-15.74627686	7.953979492	2.489435298	0.382640159	270.9092328	0.02	0
-0.125192487	0.19399939	-88.38589605	-1.245727539	-0.327671472	0.259113868	-231.3360596	117.2261963	30.37534239	0.506012598	356.7388817	5.09	0
0.051941515	0.081815492	36.46294343	-1.237915039	0.113678152	0.350424776	79.80206299	143.1569824	35.23878418	0.587288486	414.0383827	11.09	0
-0.045273773	0.35731221	-31.96328379	-0.706787109	0.11502689	0.641247036	81.20898438	114.6804199	30.29599766	0.414043014	292.3143677	1.78	0
-0.03726866	0.035302197	-26.16259942	-0.423217773	0.063942586	0.215685226	44.88769531	77.53637695	22.83078124	0.504296683	354.0162717	3.31	0
-0.10227393	0.390624895	-71.89857259	-1.651611328	-0.245332069	0.682594835	-172.4684448	94.49169922	21.97751234	0.527675498	372.5389017	7.67	0
0.022933151	0.102499958	16.30547063	-0.470214844	0.201636463	0.242333154	143.3635254	73.72570801	20.53059562	0.604704248	424.502382	0.56	0
-0.148987361	0.309894605	-104.738115	-1.439453125	0.069904268	0.547222393	49.1427002	102.0512695	24.73015434	0.513921339	361.2867014	1.22	0
-0.016979317	0.186806699	-12.00437705	-0.603881836	0.223680985	0.301135665	158.1424561	51.31982422	12.31046346	0.629932347	447.8818987	0.58	0
0.069176249	0.123655188	48.76925557	-0.424926758	0.12118119	0.26363503	85.43273926	118.0427856	30.13901893	0.585438495	411.5632618	15.35	0
0.084659253	0.148745411	59.60011423	-0.701538086	0.110362486	0.268971282	77.69519043	154.6973877	36.80463936	0.627125835	443.3779655	19.69	0
-0.10500627	0.293927139	-73.81940753	-1.219909668	-0.190852679	0.380279377	-134.1694336	112.3729858	27.83637853	0.507145801	357.5377899	12.36	0
-0.114662035	0.337746269	-80.9513969	-1.087524414	-0.168662441	0.392977832	-119.0756836	119.5787354	29.76748871	0.503915677	354.7566366	15.48	0
0.072907058	0.182068487	51.253662	-0.411254883	0.227065194	0.310582342	159.6268311	108.2623291	29.85382309	0.483123644	339.6359217	4.29	0
0.213012552	0.276977753	150.3868619	-1.616271973	0.208663811	0.538206073	147.3166504	142.0512085	35.97690203	0.507489129	358.2873251	9.88	0
0.00265816	0.115610272	1.876661179	-0.760742188	0.262105882	0.350440252	185.0467529	94.30236816	26.09239352	0.571414787	401.7045952	0.22	0
-0.02867709	0.159485209	-20.30337991	-1.571533203	-0.091584114	0.435087248	-64.84155273	133.80896	32.05547172	0.483114796	341.0790457	8.04	0
0.011065589	0.064313834	7.801239923	-0.412231445	-0.035739763	0.181195216	-25.1965332	31.859375	9.413178844	0.601145587	424.4087844	0.67	0
0.042553309	0.141776933	30.17029599	-1.77746582	-0.04322391	0.542611396	-30.64575195	109.2293701	26.02682179	0.491200307	347.7698171	3.97	0
0.239625185	0.35238039	169.6546313	-0.683349609	0.347221073	0.513773859	245.8325195	103.0633545	24.33466011	0.397657738	280.348705	10.13	0
0.017488135	0.148608196	12.32913542	-0.502807617	0.044323644	0.220935284	31.24816895	107.9130859	27.09008098	0.458107921	324.7985163	13.46	0
0.092815732	0.269200961	65.62072264	-0.712036133	0.071691877	0.341763852	50.68615723	132.017334	30.01150209	0.485860808	343.989452	10.23	0
-0.002692427	0.015582678	-1.903545897	-0.077270508	-0.004823245	0.02846539	-3.41003418	3.274169922	0.529480059	0.516684235	364.2623856	0.02	0
0.198311978	0.352697274	140.4048807	-1.088134766	0.291216489	0.497750967	206.1812744	125.2474365	31.30501058	0.487540667	344.6912519	5.61	0
-0.170701881	0.175564216	-120.3448264	-0.738769531	-0.19170095	0.240884812	-135.1491699	116.3240967	29.15590015	0.474122695	335.2047455	12.87	0
0.142243123	0.376859198	100.4236447	-0.989013672	0.08851308	0.580583804	62.49023438	131.9276123	34.01504474	0.509833069	360.9618128	10.90	0
-0.045035399	0.435625284	-31.88506243	-1.706848145	-0.409292189	0.731253577	-289.7788696	81.61914063	20.90065439	0.544569565	383.9215432	1.04	0
0.073242772	0.642437826	51.70939695	-2.63293457	-0.184743822	1.110172194	-130.4291382	139.3204956	35.03103923	0.452196903	319.2510135	8.32	0
0.010368547	0.074988641	7.299456843	-0.891601563	-0.214733644	0.232924502	-151.1724854	36.08856201	8.356920941	0.42221723	298.9297989	0.09	0
-0.090209694	0.407435494	-63.77825351	-1.283325195	-0.146131804	0.550454981	-103.3151855	141.8858643	36.03942286	0.483313978	341.2196682	16.98	0
-0.320140643	0.26339618	-226.6595754	-1.982421875	-0.364100742	0.467963959	-257.7833252	101.0541992	26.01320874	0.28798808	202.743608	8.96	0
-0.022078514	0.076975909	-15.60950958	-1.078369141	-0.039343417	0.293020299	-27.8157959	120.8566895	29.36522223	0.506306096	357.9584102	16.79	0
0.001701502	0.115048859	1.201260126	-0.448303223	-0.054473791	0.196074297	-38.45849609	39.73138428	10.80181792	0.554888421	392.8610024	0.41	0
0.056186058	0.119577925	39.61117105	-0.793395996	0.059425213	0.202797307	41.89477539	116.5955811	30.72102496	0.48357048	341.8843294	15.64	0
0.069189422	0.20009168	48.64016349	-0.61706543	0.246623705	0.368182792	173.3764648	85.83740234	24.06745607	0.437072836	308.5734225	0.24	0
-0.006080787	0.090203173	-4.280874019	-0.760986328	-0.12888839	0.298685954	-90.73742676	47.05169678	9.210066754	0.489091321	344.8093812	0.32	0
-0.005584461	0.0767331	-3.942629254	-1.043395996	-0.224015795	0.357612386	-158.1551514	71.63659668	18.52843797	0.57337781	403.0846006	0.13	0
0.114853426	0.338156225	81.20137251	-1.329833984	-0.040235031	0.597561902	-28.44616699	131.7879028	37.41124383	0.357425787	251.6277539	2.20	0
-0.040559502	0.191158977	-28.51332995	-0.778442383	-0.00748449	0.31796212	-5.26159668	72.16955566	18.10485251	0.338037622	238.654561	0.79	0
0.170012566	0.216231709	120.1988839	-1.074951172	0.11187701	0.388761655	79.0970459	147.2607422	39.21742415	0.432364453	305.6816683	16.74	0
0.214375633	0.165522147	150.9204455	-0.525146484	0.271095969	0.288222222	190.8515625	96.2791748	23.30926751	0.545785449	383.6871706	12.45	0
0.037826722	0.285201484	26.5543586	-0.941894531	0.069661632	0.355474231	48.90246582	143.5786133	34.55913011	0.46385676	327.9467295	20.03	0
0.013153383	0.30691125	9.246828018	-1.935668945	-0.26548626	0.712970626	-186.6368408	97.72406006	24.63144284	0.485027166	341.459125	2.66	0
0.031871951	0.078915827	22.50159733	-1.184020996	-0.220153549	0.356070646	-155.4284058	112.52771	30.45064839	0.513831646	360.7098153	0.75	0
-0.037651949	0.582150044	-26.61992788	-2.192932129	-0.300294868	0.900215684	-212.3084717	111.8323364	27.17130236	0.431808317	303.5612469	2.14	0
-0.09606232	0.122282817	-67.91606037	-0.916259766	-0.15581697	0.292243636	-110.1625977	168.699707	44.24410256	0.350529338	247.4737127	20.98	0
-0.240550676	0.21848088	-170.3098789	-1.160888672	-0.232988778	0.518834493	-164.9560547	180.2960205	48.24757742	0.465234181	328.9205662	15.49	0
-0.079880269	0.402660668	-56.31558991	-1.542480469	-0.056485137	0.560388603	-39.82202148	148.0505371	40.5762398	0.487794351	344.8706062	16.52	0
-0.003286321	0.055286151	-2.313570011	-0.670898438	-0.046981725	0.141957078	-33.07513428	24.63482666	5.605504204	0.518111104	366.8226615	0.64	0
0.160721276	0.22599468	112.8263356	-0.700561523	0.157857433	0.355755147	110.815918	133.642334	31.97713065	0.524723336	369.9299517	15.02	0
0.037048175	0.122251408	26.19305962	-0.540771484	0.060240232	0.256200043	42.58984375	127.520874	29.92126058	0.413520224	291.1182377	16.48	0
0.051824157	0.429578609	36.53603059	-1.33203125	0.189072716	0.563492577	133.2962646	106.9278564	26.42176324	0.463279126	325.2219465	6.47	0
-0.127200521	0.213109607	-89.80356769	-1.384765625	-0.187365308	0.286274374	-132.2799072	112.1136475	26.22899179	0.491418879	347.4331477	11.45	0
0.086853458	0.263495515	61.49224813	-1.362915039	0.193200408	0.528889577	136.7858887	105.4152832	30.52063569	0.563570167	397.316968	2.38	0
0.292989808	0.222169942	206.8508044	-0.719055176	0.285545284	0.383399576	201.5949707	113.9660645	29.45605171	0.501366578	353.9648041	10.58	0
-0.278118664	0.203602557	-197.1861328	-1.352539063	-0.393179696	0.321201942	-278.7644043	119.6968994	29.16606932	0.557758181	394.8927923	14.02	0
0.128143468	0.180135378	90.59743197	-1.18548584	-0.088317957	0.485834532	-62.4407959	98.36816406	27.80505105	0.442938015	312.7142389	0.28	0
0.138747921	0.141138132	97.40104086	-0.640625	0.021029394	0.289094521	14.76263428	164.6218262	43.85021075	0.497979898	353.0677477	13.19	0
0.080779534	0.081360528	56.78801233	-0.731567383	0.053267543	0.377071039	37.44708252	123.7119141	27.63528847	0.290521992	205.399048	10.56	0
0.086668532	0.235836653	60.92797776	-0.743530273	0.258565412	0.329423493	181.7714844	131.1973877	36.23933928	0.442568572	310.6831373	4.64	0
-0.047434525	0.448678626	-33.53620904	-2.112121582	-0.309370977	0.747678465	-218.7252808	67.99481201	18.35818343	0.474101447	333.2933174	0.69	0
-0.189518474	0.221041378	-134.1790799	-1.125366211	-0.380588769	0.344772385	-269.4568481	105.840332	26.48361444	0.556756102	391.3995395	7.22	0
0.010022351	0.34279457	7.085802424	-1.480529785	-0.193676896	0.562434115	-136.9295654	110.2533569	27.79715978	0.47439661	335.3984033	3.00	0
-0.036097029	0.320051596	-25.44840535	-1.185058594	0.089899331	0.632099893	63.37902832	77.88781738	19.97409753	0.452995724	320.7209726	0.62	0
0.095982883	0.327833474	67.57194964	-1.190063477	0.087240739	0.454096649	61.41748047	144.739563	37.27245759	0.436494735	308.6017773	17.75	0
0.021083542	0.183655132	14.88498054	-1.165283203	0.073646437	0.445036233	51.99438477	143.5854492	36.95750139	0.520456636	366.9219281	10.52	0
-0.017707391	0.245153348	-12.51912546	-1.090942383	-0.014458944	0.455680234	-10.22247314	117.0045776	27.73519805	0.485716901	341.9446981	8.57	0
-0.015405796	0.352434298	-10.83027447	-1.900390625	0.258448898	0.768619355	181.6895752	156.5845947	41.81612492	0.516099861	364.3665017	4.78	0
0.088922897	0.254628038	62.86848848	-0.464233398	0.147709913	0.308216619	104.4309082	119.4020996	30.13712632	0.499026924	352.8120356	14.66	0
-0.227919087	0.13342875	-159.9991993	-0.924865723	-0.263632837	0.220981739	-185.0702515	119.0075073	29.38921399	0.558844561	392.8677261	16.34	0
0.113739331	0.428000156	79.95874974	-0.661499023	0.240904807	0.590479837	169.3560791	112.4807739	27.60700261	0.509215224	360.0151634	11.02	0
-0.07144113	0.259820845	-50.50887911	-1.600585938	-0.435315339	0.520167667	-307.7679443	106.9379272	25.30050782	0.531503155	373.1152149	2.69	0
-0.042088188	0.419310615	-29.54590818	-1.473327637	-0.016781886	0.58719043	-11.78088379	116.2332764	27.36575124	0.521850377	366.8608148	12.98	0
0.007927425	0.125095277	5.596761864	-1.142883301	-0.249526848	0.399560032	-176.1659546	92.15301514	25.66237681	0.431727619	305.2314264	0.22	0
0.121735059	0.300605036	85.94495193	-1.46282959	0.029587959	0.483393593	20.88909912	125.3883667	30.77644014	0.538392674	377.9516574	5.85	0
-0.213120252	0.441901221	-150.6760183	-3.633056641	-0.685637694	1.037915501	-484.7458496	86.69824219	23.62272355	0.367433652	259.4081583	0.18	0
0.150426984	0.142849763	106.0510234	-0.552978516	0.161513828	0.314654403	113.8672485	145.2941284	36.13188948	0.467917826	330.349985	17.80	0
-0.121856686	0.186984501	-85.78710729	-1.009399414	-0.128794237	0.32971277	-90.67114258	116.3044434	31.00867407	0.304673734	215.4043298	12.27	0
0.387968716	0.323888606	272.3540385	-0.607299805	0.469344528	0.503528655	329.4798584	164.677063	43.68470424	0.479380425	337.9631999	9.51	0
0.119446725	0.235190765	84.44883469	-1.349365234	0.188553051	0.454447655	133.3070068	135.9138184	34.36086201	0.517612738	364.3993673	8.67	0
0.039616472	0.359065613	27.85037947	-1.126708984	0.095775881	0.485586329	67.33044434	118.3770752	32.24583744	0.493830482	346.6689981	7.53	0
-0.027458742	0.250713754	-19.38587181	-0.513671875	0.083681274	0.370832577	59.07897949	125.1552734	31.92010946	0.52973873	374.5252823	5.32	0
-0.151267984	0.207041758	-106.7951969	-0.969482422	-0.198573904	0.30566212	-140.1931763	121.812561	31.61280802	0.534959527	376.0765471	15.35	0
0.060740528	0.12652228	42.9435533	-0.684204102	-0.005707089	0.308617778	-4.034912109	132.6074219	32.29947022	0.549211962	387.7436451	12.30	0
0.153192437	0.400468105	108.4602456	-2.18347168	0.212979074	0.637013056	150.7891846	181.2966309	48.48199814	0.519210907	366.5629006	10.30	0
-0.20450991	0.139305652	-145.4065457	-1.077270508	-0.266450992	0.213199996	-189.4466553	132.9429932	31.86197502	0.459079327	324.5690839	18.08	0
-0.0144325	0.297568046	-10.13161517	-2.006164551	-0.284937932	0.693201434	-200.0264282	116.6898804	32.97140511	0.497578713	352.285729	0.85	0
-0.011621257	0.056641264	-8.204607193	-0.448608398	-0.083389153	0.127967648	-58.8727417	19.21868896	4.508838795	0.529066397	376.166208	0.17	0
0.027670404	0.083675322	19.50763497	-0.914550781	-0.028525581	0.330219245	-20.11053467	145.5685425	40.08730217	0.461298799	323.8317569	17.14	0
0.174755242	0.235853769	122.852935	-1.309570313	0.113606308	0.632477167	79.86523438	141.564209	33.56598385	0.380443457	268.5930806	0.85	0
0.012190864	0.10359087	8.618940711	-0.645263672	0.143659492	0.296715434	101.5672607	95.57189941	24.51457827	0.469830386	331.2304224	1.99	0
-0.109209445	0.301578648	-77.21107777	-1.722229004	-0.385696346	0.571967875	-272.6873169	91.97210693	21.73673956	0.440013778	309.329686	4.57	0
0.023597247	0.096934065	16.70685081	-0.982421875	-0.189096656	0.296907298	-133.8804321	43.5859375	10.23184427	0.589949416	417.0942372	0.11	0
-0.04632538	0.3259346	-32.56674206	-0.98840332	0.013678821	0.505438417	9.616210938	124.6860352	29.60478281	0.439374575	310.6378247	3.93	0
0.007399091	0.08842918	5.238556453	-1.252746582	-0.019921427	0.320209336	-14.10437012	135.8370361	36.41238111	0.281568969	199.3508302	6.85	0
0.043371939	0.419683353	30.70733266	-1.55078125	0.01638225	0.586551825	11.59863281	125.2050781	32.58066185	0.516762828	363.2842682	9.66	0
-0.079606323	0.107926779	-56.60009593	-0.703125	-0.012961258	0.267584474	-9.215454102	67.19445801	18.21675001	0.493928574	349.7014304	1.08	0
0.001218033	0.046463444	0.855059417	-0.797424316	0.017100016	0.180702788	12.00421143	8.867919922	1.962743983	0.49429236	349.9589911	0.01	0
-0.00562364	0.063294858	-3.975913677	-0.699829102	-0.004684858	0.152935051	-3.312194824	25.91845703	5.562817418	0.603270436	428.9252799	0.28	0
0.173093779	0.185127734	121.5118329	-0.521118164	0.169762245	0.257816127	119.1730957	106.354126	25.45665838	0.546062021	383.3355386	14.00	0
-0.093144483	0.438875215	-65.76000508	-1.641357422	-0.211259534	0.624153828	-149.149231	90.76977539	21.82580443	0.479252756	338.8316982	9.06	0
0.045193673	0.191936424	31.95192702	-1.944580078	-0.016566685	0.490262933	-11.71264648	162.807251	40.73060681	0.481677281	338.1374513	5.23	0
-0.116649882	0.430094632	-82.47146671	-1.665161133	-0.184375553	0.613802001	-130.3535156	115.277832	29.24185159	0.496643631	350.6304035	8.25	0
0.069482529	0.178449111	48.77673505	-0.988647461	0.030582091	0.281375504	21.46862793	113.2645264	28.60402589	0.478074747	337.9988463	13.69	0
0.173022462	0.289093063	121.4617686	-0.846313477	0.439017011	0.339460736	308.1899414	74.18554688	17.80211885	0.518472173	366.559826	3.73	0
0.024031023	0.355100419	16.86977829	-0.721069336	0.280751807	0.576669976	197.0877686	82.7911377	19.24322778	0.46981092	329.8072662	0.91	0
-0.273290158	0.427241722	-193.2161415	-2.05859375	-0.37820413	0.751405085	-267.3903198	101.9898071	24.55432215	0.600130883	421.2918797	9.52	0
0.095089333	0.355216454	67.13306936	-1.045288086	0.274246173	0.630527019	193.6177979	124.8547363	32.12875229	0.562556925	394.9149615	1.84	0
-0.19623443	0.254617607	-138.5415073	-1.447143555	-0.150955676	0.452169726	-106.574707	134.4727783	34.5605969	0.574069199	405.8669235	6.48	0
-0.0323179	0.288761386	-22.84875553	-1.208129883	0.043407305	0.377436269	30.68896484	99.21948242	25.4685738	0.541485984	382.2891047	6.67	0
-0.030395423	0.082073749	-21.45916837	-0.567138672	-0.049608268	0.186720607	-35.0234375	69.20593262	17.91102305	0.531487385	375.2300938	9.19	0
-0.041281661	0.278609162	-29.22741597	-1.096435547	-0.183579439	0.437063946	-129.9742432	113.0151367	28.73933377	0.559863477	395.8234784	5.29	0
0.00335648	0.227571594	2.369675186	-1.758605957	-0.238622649	0.476780248	-168.4675903	105.354126	27.00463719	0.500287204	353.2027663	2.28	0
-0.065285215	0.285040888	-46.48307299	-1.448730469	-0.29185443	0.583984385	-207.800354	74.45117188	22.14511221	0.455115029	322.2214403	0.32	0
0.155397206	0.423322611	109.7104272	-1.771362305	0.139752353	0.754513097	98.66516113	96.93481445	23.4537037	0.439375514	310.1991125	7.09	0
0.142171535	0.163576508	100.5152752	-0.988769531	0.12695606	0.342371577	89.75793457	151.5396729	39.71679772	0.4530902	322.6002224	18.57	0
0.231751996	0.240183689	162.6899012	-0.368652344	0.300381652	0.287361921	210.8679199	132.3095093	30.57971416	0.480273406	339.0730249	15.85	0
0.088638982	0.294548987	62.13592665	-1.186950684	-0.171603259	0.611996999	-120.2938843	76.85308838	19.24408435	0.475813362	336.4000469	2.68	0
-0.069816447	0.250125539	-49.08096228	-1.429077148	-0.336808662	0.47514609	-236.7764893	86.63342285	21.22725622	0.48229084	338.5681699	1.80	0
0.127292569	0.215337576	90.37772403	-0.812988281	0.013545678	0.465806239	9.617431641	89.95397949	25.61818535	0.444582841	312.541737	0.85	0
-0.080438702	0.187821201	-56.78972348	-0.822021484	0.21813083	0.31890977	154.0003662	74.53955078	17.25820792	0.384846936	273.2413243	0.27	0
0.130409407	0.469304283	92.06904144	-1.594604492	0.30658348	0.60556512	216.447937	127.7823486	32.28221559	0.709310468	500.7731906	1.08	0
0.097229628	0.18448625	68.44965823	-0.880371094	0.153533762	0.296714034	108.0877686	121.0892334	30.5311805	0.556808537	393.1068268	10.78	0
-0.132561884	0.241516065	-93.19100437	-0.880859375	-0.181922793	0.315968938	-127.8917236	132.3790283	30.60591964	0.515019218	362.5735294	19.01	0
-0.00471452	0.21839551	-3.333165882	-0.515869141	0.23699062	0.44335184	167.5523682	75.59729004	19.75265724	0.506760649	356.2527365	0.33	0
0.03400521	0.367818292	24.0416833	-0.801757813	0.340231198	0.619007199	240.543457	97.22875977	20.77034014	0.591802259	418.4041969	0.61	0
0.053162026	0.16740701	37.53239049	-0.324829102	0.112790116	0.202294728	79.62982178	59.28814697	14.08412598	0.577418072	408.2345771	6.19	0
0.166754465	0.139765173	117.8954067	-1.424682617	0.158812959	0.36538086	112.2807617	119.4991455	30.47305261	0.532333482	375.8274386	11.00	0
-0.168474577	0.146612665	-118.6061023	-0.80670166	-0.175888842	0.239551798	-123.8257446	110.9625244	27.78135206	0.468371479	331.1386357	15.98	0
0.005847869	0.067560197	4.116899986	-0.522155762	-0.042878064	0.191018958	-30.18615723	16.76293945	3.526414948	0.532630547	374.9719048	0.04	0
0.079898563	0.237907252	56.16868995	-0.457397461	0.255358939	0.310539059	179.517334	87.6829834	20.49263684	0.483789086	340.5875165	4.91	0
0.090415694	0.207008188	63.92389535	-0.848266602	0.072840063	0.352293641	51.4979248	153.958374	40.36385943	0.564070013	396.5412193	17.31	0
-0.210091138	0.420400351	-148.744526	-3.16192627	-0.333814632	0.705792153	-236.3407593	135.0819702	33.39717443	0.47552827	336.1984869	6.95	0
0.04318263	0.337012368	30.31420618	-1.428955078	-0.220284226	0.520326986	-154.6395264	104.4346924	26.95997939	0.527792044	373.6767671	1.92	0
0.116597188	0.244294176	82.31761484	-1.258728027	-0.180959296	0.491352432	-127.7572632	105.0793457	27.58606923	0.387224536	271.8316242	2.66	0
0.019884346	0.10977339	14.03834794	-0.708129883	0.105950634	0.323184321	74.80114746	131.756958	36.37453812	0.363390889	256.5539678	5.38	0
0.018825393	0.15705735	13.34720351	-1.616333008	-0.402869565	0.424960339	-285.6345215	61.01379395	11.86873133	0.543472131	383.6913247	0.13	0
-0.088339668	0.281107907	-62.36780541	-1.443603516	-0.218884519	0.347289664	-154.5324707	101.8538208	25.41452493	0.281497982	199.582069	13.86	0
0.086580622	0.238280919	61.21250007	-0.628417969	0.177234353	0.358532635	125.3046875	115.427002	28.23735134	0.458918345	323.9963518	2.50	0
0.065144004	0.07213527	45.9916671	-0.444824219	0.134704071	0.199527825	95.10107422	131.7581787	34.58697629	0.504519185	356.6950638	12.21	0
0.085887229	0.175164772	60.72227078	-1.532470703	-0.076562431	0.532559132	-54.12963867	127.5332031	32.60122092	0.520206887	367.266062	0.93	0
0.158638652	0.3285586	111.3643339	-0.508422852	0.321487122	0.43453484	225.68396	158.6159058	40.66581635	0.431051265	304.753244	12.09	0
0.010539275	0.06243129	7.461806585	-0.40838623	-0.007022491	0.081765512	-4.971923828	13.28161621	3.43763784	0.524516329	368.2104628	0.97	0
-0.196982878	0.420640961	-139.4638776	-1.926513672	-0.325421005	0.625878342	-230.3980713	110.8997803	27.26355707	0.382839818	271.050591	7.06	0
0.06259246	0.326332214	44.12768462	-0.906982422	0.132337724	0.469226296	93.2980957	127.611084	30.79569971	0.498469553	352.9164432	13.19	0
-0.052416825	0.356671154	-37.00627825	-1.245239258	0.035696748	0.519795864	25.2019043	130.4621582	31.84325149	0.509672395	359.3190383	15.03	0
-0.066183768	0.145402504	-46.85810793	-0.665405273	-0.116927325	0.233123409	-82.7845459	111.4064941	26.28756261	0.543665709	383.8279904	14.65	0
0.101300151	0.316409687	71.41660638	-1.397644043	-0.255389361	0.564449385	-180.0494995	78.46905518	17.99081554	0.496059886	351.2103995	1.88	0
-0.004565057	0.411131807	-3.204669964	-1.49786377	-0.168927924	0.591066422	-118.5874023	92.38763428	24.67695971	0.323008575	227.7210456	1.30	0
0.18166395	0.231352952	127.5280927	-0.430175781	0.270422607	0.28120424	189.8366699	144.8568115	35.55142374	0.453836196	318.5930096	16.48	0
0.06975888	0.248613148	49.18001069	-0.758789063	0.169634793	0.443109219	119.5925293	106.4439697	31.16812964	0.501234471	351.8665988	2.47	0
0.081966362	0.263245406	57.86825166	-1.361694336	0.212365169	0.589087904	149.9298096	161.4923096	47.1725743	0.56662645	399.471647	5.27	0
-0.017593023	0.265000013	-12.40308133	-0.937683105	-0.077370761	0.337488867	-54.54638672	127.5082397	29.64512364	0.541807807	382.5163116	14.89	0
0.02233895	0.323671692	15.70428197	-0.905517578	0.009191391	0.42454715	6.461547852	120.5135498	26.95005848	0.466226219	328.6894845	12.06	0
-0.070918529	0.050650927	-50.13940018	-0.536010742	-0.037140799	0.219407041	-26.25854492	94.2199707	25.35796029	0.509964168	358.5048101	9.23	0
-0.026771975	0.042616852	-18.82069872	-0.211791992	-0.026309365	0.063233897	-18.4954834	21.68566895	5.269824048	0.536507575	379.3108552	3.04	0
0.066004619	0.423319962	46.66526562	-0.755859375	0.075039056	0.594397275	53.0526123	130.8568115	33.01130162	0.53797897	378.1992159	10.52	0
0.004265872	0.171112876	2.998908252	-0.403442383	0.177251129	0.192166861	124.6075439	60.92736816	14.60319335	0.464391725	328.3249496	0.67	0
0.145349351	0.218922444	102.4712927	-0.388793945	0.254056197	0.389782983	179.1096191	94.98498535	26.49746606	0.666963873	468.8756024	5.05	0
-0.013103077	0.125025097	-9.250772567	-0.742248535	-0.046503083	0.266179608	-32.83117676	136.6171875	35.21415246	0.520498596	366.95151	14.13	0
0.034211267	0.135761064	24.15315427	-0.889770508	0.104980296	0.486940875	74.11608887	110.5582275	33.29650393	0.551801777	390.1238562	0.66	0
-0.014856604	0.05405326	-10.44419276	-0.509887695	0.120096524	0.262911014	84.42785645	110.1925049	29.64032892	0.495355699	349.7211237	0.68	0
-0.119277547	0.186615827	-84.20994809	-0.947998047	-0.103503522	0.320621285	-73.07348633	129.3148193	30.83888892	0.534065428	377.0501924	17.45	0
-0.041180153	0.36132255	-29.11436821	-1.966552734	-0.191799223	0.795884785	-135.6020508	110.6945801	31.66584785	0.566373117	398.1603013	4.47	0
0.061857746	0.272057299	43.73342657	-0.518188477	0.29305767	0.444154816	207.1917725	83.22460938	19.60959227	0.518719994	366.2163158	3.42	0
-0.00751536	0.213796833	-5.320874891	-1.575683594	-0.337329412	0.634464126	-238.8292236	92.39123535	25.87768854	0.510559405	360.9654996	1.03	0
0.025973062	0.326893057	18.36295473	-1.332519531	-0.235008661	0.504813289	-166.151123	61.16326904	14.46470469	0.566670277	400.6358858	2.44	0
0.027623964	0.073649871	19.39202269	-0.867858887	-0.171184225	0.295017902	-120.1713257	92.21502686	27.3394262	0.408978118	289.5565075	0.06	0
-0.022662931	0.31382448	-16.02269202	-1.375488281	-0.051425011	0.45923458	-36.35748291	133.0446777	32.75018543	0.388135139	274.411543	15.85	0
0.224989668	0.424266504	159.0676955	-1.309204102	0.422993661	0.532609367	299.0565186	120.9570313	27.92004221	0.314475483	220.7617888	5.99	0
-0.05187695	0.119511494	-36.62512669	-0.657348633	-0.013246358	0.214293875	-9.351928711	124.9611816	30.3454831	0.498873032	352.7032338	16.47	0
0.085161097	0.349784214	60.20889539	-0.590087891	0.407912366	0.546601442	288.394043	77.32714844	18.33017057	0.552870466	390.8794198	0.52	0
-0.004109868	0.06156667	-2.885127135	-0.501037598	-0.03301915	0.188494788	-23.17944336	5.119506836	1.086378336	0.532252692	375.7704005	0.03	0
-0.06482362	0.358610202	-45.4413576	-1.176269531	0.007437756	0.601641775	5.213867188	104.8602295	32.27693351	0.58842544	416.0167861	1.75	0
0.116277501	0.203107454	81.74308295	-0.619750977	0.131188947	0.36466096	92.22583008	129.4388428	29.90558892	0.604714232	424.5093911	13.60	0
0.19552344	0.218090215	138.0395488	-0.82409668	0.293098255	0.439255348	206.9273682	104.2655029	26.12083735	0.480243512	337.6111889	2.05	0
-0.049052557	0.306035634	-34.58205261	-1.974731445	-0.36530225	0.771554743	-257.5380859	98.32946777	23.55242669	0.496520455	350.5434409	0.29	0
0.04649172	0.176459631	32.82315441	-0.72277832	0.126993585	0.299557002	89.6574707	109.3287354	28.69525448	0.46781266	329.8079253	7.44	0
0.116267317	0.327458934	82.20099279	-0.635253906	0.276992906	0.435232995	195.8339844	116.2077637	26.78915565	0.547332826	386.4169752	8.82	0
-0.065786903	0.232019209	-46.77448819	-1.61340332	-0.434097054	0.439011016	-308.6430054	84.90966797	18.45644096	0.534785667	378.0934664	0.05	0
-0.121337412	0.316887406	-85.54287563	-1.264892578	-0.315977359	0.413251933	-222.7640381	69.27905273	17.3821118	0.376604987	267.7661461	3.84	0
-0.070465318	0.263268522	-49.81898015	-1.856079102	-0.415022487	0.655566363	-293.4208984	103.5411987	26.99870685	0.438915383	309.435345	3.38	0
0.137371024	0.2631304	96.57182959	-0.791381836	0.231017285	0.344293098	162.4051514	105.7283936	27.84471052	0.429713956	303.8077668	14.86	0
0.057838692	0.121227543	40.83411678	-0.25390625	0.242203061	0.252089754	170.9953613	43.05700684	9.078820716	0.51393611	361.2970852	0.33	0
0.137494662	0.280857817	96.52125302	-1.657897949	0.13093719	0.729047998	91.91790771	139.0808105	30.06671893	0.640536902	452.2190529	3.65	0
0.20690121	0.518770894	146.2791552	-2.939697266	0.023144238	1.008936205	16.36297607	129.5411987	36.23194211	0.459901942	322.851163	4.00	0
0.008722337	0.338541096	6.140525286	-1.612548828	-0.318529909	0.637958467	-224.2450562	66.35656738	14.47510117	0.375026368	265.1436419	2.33	0
-0.019659931	0.206517414	-13.84059139	-0.519897461	0.204619841	0.37600087	144.0523682	73.99304199	16.3917027	0.419362766	295.2313876	1.03	0
-0.04717098	0.338321381	-33.39705416	-0.81640625	-0.083687648	0.435178369	-59.25085449	150.0744629	38.23747723	0.590481857	415.6992272	19.20	0
0.02537608	0.231803911	17.91551271	-0.352050781	0.295872675	0.323782237	208.8861084	78.49658203	17.16905515	0.503646638	356.5818195	1.29	0
0.046763478	0.23181477	32.78119786	-0.529541016	0.247037052	0.338003942	173.1729736	87.14758301	22.13929653	0.606881439	428.4582956	0.52	0
0.023182165	0.026385178	16.38979061	-0.067016602	0.030201438	0.045861901	21.35241699	6.414794922	1.464252752	0.537231773	379.8228638	0.06	0
-0.101957117	0.357937023	-71.67585302	-1.627075195	-0.389134631	0.548607386	-273.5616455	84.5057373	20.57184012	0.437861607	307.8167096	2.35	0
-0.035994384	0.259014378	-25.34004627	-1.411132813	-0.200904239	0.425225439	-141.4365845	85.65106201	20.52773237	0.423010005	297.7990435	0.68	0
-0.110150784	0.27424072	-77.21569947	-0.794311523	0.125239265	0.431259226	87.79272461	69.82702637	14.10739336	0.623249951	436.8982159	0.78	0
-0.097954955	0.459033343	-69.3521082	-1.828613281	-0.191529613	0.666366457	-135.6029663	95.61669922	22.65745171	0.503052521	356.1611846	8.70	0
-0.046758472	0.260193253	-33.10499829	-1.320678711	-0.020113325	0.372158872	-14.24023438	111.3730469	27.56857366	0.5144424	364.225219	13.69	0
0.116685151	0.167981809	82.4964015	-0.888000488	-0.003133598	0.351734031	-2.215454102	72.03302002	19.63379202	0.35797686	253.0896402	1.39	0
0.182701747	0.309665424	128.9874334	-0.582092285	0.298686776	0.388221018	210.8728638	94.10565186	23.89600101	0.518074402	365.7605278	7.04	0
0.10371334	0.170971635	72.80676492	-0.748596191	0.068997375	0.308047745	48.43615723	136.9202881	35.34120545	0.457888348	321.4376205	13.33	0
0.239505493	0.312773596	169.5698888	-0.574645996	0.331780816	0.489141798	234.9008179	137.7072144	33.98236306	0.48830048	345.7167398	11.46	0
0.167581186	0.327542316	118.3123172	-0.681762695	0.348492155	0.414634732	246.0354614	93.70733643	22.49114582	0.532836968	376.1828994	3.03	0
0.026728545	0.134540148	19.0307242	-0.728271484	0.123907111	0.217919244	88.22186279	39.7076416	8.057629773	0.589762374	419.9108106	1.50	0
0.105149695	0.359318911	74.1305348	-1.544311523	0.008591586	0.57451873	6.057067871	87.0848999	21.48686294	0.445169476	313.8444808	4.86	0
-0.201157991	0.220879305	-141.8163836	-0.896850586	-0.34903677	0.253474095	-246.0709229	129.2427979	31.41330863	0.482606824	340.2378108	13.53	0
-0.097504078	0.325218944	-68.83787881	-1.826416016	-0.400689576	0.479290172	-282.8868408	65.21228027	13.95482115	0.327080913	230.9191244	0.22	0
-0.028101778	0.067923185	-19.92416025	-0.62487793	-0.126170601	0.204491539	-89.45495605	133.727417	35.29492013	0.448174779	317.7559186	14.19	0
0.131488367	0.257502843	92.56781039	-0.46862793	0.273380626	0.370795199	192.4599609	170.472168	45.78804361	0.515513507	362.9215088	14.92	0
-0.035585692	0.141956058	-25.12349825	-1.488830566	-0.352995789	0.433632463	-249.2150269	29.5559082	6.662920071	0.279419811	197.2703863	0.02	0
-0.027121925	0.160597918	-19.0667133	-2.009155273	-0.04918001	0.614228781	-34.57354736	101.5407104	32.27060092	0.541037337	380.3492476	1.32	0
-0.117283921	0.319348152	-82.56788057	-2.035644531	-0.477483489	0.635864054	-336.1483765	119.7744751	31.36152587	0.449813975	316.6690383	3.20	0
0.100210577	0.173839943	70.84887763	-0.910217285	0.203522117	0.351662372	143.8901367	81.68212891	18.66098911	0.531143982	375.5187952	6.72	0
-0.076168932	0.144957784	-53.85143472	-0.763061523	-0.052378351	0.164626339	-37.03149414	112.2921143	27.54075565	0.534847929	378.1374857	13.74	0
0.020788444	0.315721742	14.63506442	-1.428894043	-0.183290482	0.581313461	-129.036499	68.746521	19.26836172	0.38188588	268.8476594	0.11	0
0.012739321	0.379194947	9.032178279	-1.400634766	0.237841866	0.436553281	168.6298828	128.6121826	28.00795229	0.576481024	408.7250463	12.09	0
-0.160386477	0.263000929	-112.7516934	-0.932617188	-0.227331734	0.346502551	-159.814209	117.595459	31.98033219	0.486836299	342.2459181	9.62	0
0.087909856	0.271730483	62.06435848	-1.906066895	-0.26789013	0.642876297	-189.1304321	111.0089722	31.02173011	0.392497001	277.1028825	0.24	0
0.089620989	0.116783881	62.91393453	-0.537475586	0.024380328	0.219846585	17.11499023	135.857666	31.74318371	0.464937392	326.3860495	16.22	0
-0.046849764	0.414884959	-33.02908388	-1.564208984	-0.310499086	0.592053658	-218.9018555	106.6530762	24.61067076	0.43273675	305.0794087	4.31	0
-0.019622639	0.311493979	-13.81433788	-1.427490234	-0.192093502	0.440550943	-135.2338257	90.33935547	21.86718587	0.414828455	292.0392324	6.68	0
-0.085831035	0.311874304	-60.42504855	-1.385498047	-0.384520617	0.458599237	-270.7025146	80.78942871	17.6122778	0.403557952	284.104798	2.38	0
-0.031952046	0.180698837	-22.52619244	-1.041625977	0.078349921	0.295822405	55.23669434	33.75683594	5.789739815	0.620672594	437.5741787	0.83	0
0.257568979	0.435526092	182.3588369	-1.20904541	0.40168926	0.582291361	284.3959961	119.4752197	27.64661796	0.491588126	348.0443931	6.45	0
-0.036931063	0.125756347	-26.11026161	-0.93347168	-0.251224674	0.307821305	-177.6158447	147.3778076	40.36436506	0.414538349	293.0786127	2.61	0
0.181705482	0.265743416	127.9206591	-0.783569336	0.167287306	0.359470856	117.7702637	144.2420654	34.70638082	0.474915021	334.3401747	18.36	0
-0.012162947	0.032707949	-8.59920361	-0.187561035	-0.008836112	0.053969392	-6.247131348	2.544799805	0.551891747	0.506346912	357.9872668	0.03	0
-0.007429959	0.170542479	-5.245551259	-1.737121582	-0.40514886	0.578875793	-286.0350952	78.84875488	20.92884642	0.381686903	269.4709532	0.65	0
-0.178213344	0.14618826	-125.1057672	-1.050048828	-0.189449821	0.287981359	-132.9937744	142.519043	37.95837907	0.522710162	366.942534	19.35	0
-0.071480377	0.266804984	-50.39366569	-1.080322266	0.121618739	0.449769109	85.74121094	102.4654541	23.01473301	0.569529608	401.5183733	0.45	0
-0.053494704	0.358433648	-37.71376661	-1.080932617	0.311606203	0.719437087	219.682373	127.4953613	31.59423581	0.554507297	390.9276446	1.98	0
0.049162555	0.164421447	34.56127621	-1.243286133	0.04837926	0.259201478	34.01062012	127.456543	32.66907063	0.495599058	348.4061376	10.52	0
0.248712033	0.32795027	175.5906955	-0.471191406	0.285684818	0.457270135	201.6934814	147.9371338	36.56022881	0.466948953	329.6659611	17.47	0
-0.08328213	0.230236206	-58.46405534	-0.9140625	0.286477983	0.445445253	201.1075439	76.60302734	18.3778241	0.653653958	458.8650784	0.17	0
0.058827452	0.296994657	41.23804411	-1.764404297	0.04621528	0.428183648	32.39691162	130.2991943	32.57908447	0.485963215	340.6602134	13.55	0
0.109853706	0.206233373	77.0074477	-0.450561523	0.147869638	0.239402766	103.6566162	128.1044922	31.48272831	0.496382757	347.9643123	20.04	0
-0.088430496	0.282584278	-62.4319303	-1.599731445	-0.276687233	0.554954579	-195.3411865	106.4130859	28.3539589	0.477149244	336.8673663	4.28	0
0.034062209	0.168864621	24.15010653	-1.594482422	-0.347453861	0.483296797	-246.3447876	98.69500732	26.1092376	0.371067101	263.0865746	0.29	0
0.238953321	0.229685845	167.984185	-0.297485352	0.319187474	0.329869128	224.3887939	131.7913818	30.43540403	0.497512915	349.7515795	10.48	0
-0.185597404	0.155245169	-130.8461701	-0.91809082	-0.256837323	0.226160153	-181.0703125	116.776001	29.05167513	0.518486072	365.5326806	16.63	0
-0.045238448	0.112695571	-31.98358294	-1.204528809	-0.248550091	0.357462694	-175.7249146	86.49060059	24.70028213	0.373483128	264.0525717	1.33	0
-0.058826612	0.504136373	-41.41393494	-1.481689453	-0.030778538	0.681357693	-21.66809082	109.9007568	25.55096751	0.531469441	374.1544862	9.30	0
0.00045172	0.02921526	0.318914384	-0.187805176	-0.007563259	0.049397491	-5.339660645	4.213928223	0.793789862	0.428572892	302.5724614	0.03	0
0.112087253	0.279163193	78.90942641	-0.612792969	0.159377878	0.422824986	112.2020264	126.9847412	28.77986252	0.503036568	354.1377435	13.91	0
0.01023544	0.290791238	7.236456182	-1.752258301	0.003613937	0.469813183	2.555053711	126.4502563	32.28106871	0.513250812	362.8683241	8.74	0
0.052838144	0.333311644	37.14521488	-1.781188965	-0.211184679	0.771549068	-148.4628296	102.1797485	30.17168012	0.441566715	310.4214003	0.37	0
-0.108260202	0.349253183	-76.10692175	-1.891845703	-0.326903602	0.628681542	-229.8132324	109.5218506	25.90910069	0.476446585	334.9419495	5.94	0
0.066491927	0.322903272	46.81031658	-1.886230469	-0.232308301	0.72159342	-163.5450439	138.9581299	38.26850647	0.44527403	313.4729172	0.79	0
-0.147362674	0.226511818	-104.4801356	-1.554321289	-0.196460546	0.380207833	-139.2905273	91.83007813	23.23134411	0.52031016	368.8999037	9.54	0
0.271434427	0.299317039	192.1755744	-0.704223633	0.135187009	0.521407587	95.71240234	127.0748291	34.17543604	0.393277287	278.4403194	2.94	0
0.037722001	0.219290821	26.63173254	-0.692504883	0.362996304	0.336501063	256.2753906	107.0333252	27.93176877	0.629428375	444.3764327	0.94	0
0.043931875	0.196956803	31.10376755	-0.952209473	-0.087159582	0.355482377	-61.70898438	54.06652832	12.68446893	0.378006536	267.6286272	3.05	0
-0.12207426	0.117422476	-85.9402792	-1.083496094	-0.156956066	0.391392735	-110.4970703	110.5461426	29.31518718	0.498989976	351.2889434	13.19	0
-0.069733057	0.3233454	-49.02233885	-1.583007813	-0.103413871	0.605693861	-72.69995117	111.0801392	31.54710301	0.538338071	378.4516637	5.41	0
-0.006402741	0.210362015	-4.50112673	-0.451416016	0.272680074	0.202367699	191.6940918	65.16259766	13.56943498	0.617554004	434.1404646	0.86	0
-0.0058029	0.136150719	-4.073635706	-0.553833008	0.007282138	0.262354906	5.112060547	139.4158936	37.30942662	0.521206958	365.8872842	18.77	0
-0.211937283	0.256111138	-149.2038469	-1.408325195	-0.318338047	0.412578318	-224.1099854	131.1582031	32.41352583	0.499788253	351.8509303	9.43	0
-0.187565845	0.235335859	-132.4214864	-1.307617188	-0.296278654	0.327422179	-209.1727295	101.583252	23.95466659	0.511272439	360.9583422	13.21	0
0.066078167	0.407198363	46.71726431	-2.365966797	0.042564727	0.589932528	30.09326172	127.6525879	29.90860377	0.446316598	315.5458345	1.01	0
-0.033370708	0.171495087	-23.69320264	-0.780273438	0.001309591	0.372507631	0.92980957	126.3874512	36.15777895	0.525606945	373.1809313	6.98	0
-0.026875395	0.171965727	-18.92027801	-0.442871094	0.179094835	0.281047101	126.0827637	60.45532227	13.13584779	0.602334944	424.0438006	1.00	0
0.008019314	0.276354201	5.66163593	-1.487670898	-0.290159231	0.53356061	-204.852417	58.74993896	14.07420245	0.36306809	256.3260717	0.46	0
-0.202279179	0.369877455	-142.8091006	-1.376220703	-0.153477137	0.524338695	-108.3548584	106.2874756	27.3236812	0.57157486	403.531851	7.53	0
0.095791691	0.178546549	67.34155844	-1.227783203	-0.126307437	0.485007704	-88.79412842	90.25537109	24.06292705	0.35293427	248.1127916	0.04	0
-0.146525384	0.425315813	-103.5934467	-1.935546875	-0.083788924	0.545423063	-59.23876953	103.8178711	22.32014525	0.572219758	404.5593689	0.78	0
-0.163332525	0.133532554	-115.1494304	-1.142578125	-0.099169056	0.3992732	-69.91418457	139.5488281	37.40293988	0.550379121	388.0172804	9.91	0
-0.11175382	0.151445508	-79.45696574	-0.94543457	-0.220462762	0.357336241	-156.7490234	96.75732422	22.92013494	0.480182182	341.4095312	8.82	0
0.071578719	0.549649614	50.31983927	-1.642211914	0.169760909	0.744168199	119.3419189	134.3915405	35.47335166	0.51461236	361.7724887	7.52	0
0.042062426	0.133196712	29.7801977	-0.864562988	-0.149366303	0.283612538	-105.7513428	97.80169678	26.55594479	0.361309894	255.8074048	1.03	0
0.121854431	0.243140804	85.78551943	-1.292419434	0.090029543	0.395341595	63.38079834	130.5280762	30.97887738	0.470093013	330.9454809	1.06	0
-0.296634752	0.388370395	-208.2375958	-1.820800781	-0.432720826	0.582452036	-303.7700195	107.6595459	28.08919151	0.527756078	370.4847667	6.76	0
0.172136357	0.258507258	121.5282684	-0.235961914	0.362124521	0.29546932	255.6599121	120.0244141	25.92408525	0.534416977	377.2983854	9.79	0
-0.003357608	0.401034053	-2.367113382	-1.751586914	0.059505381	0.508412472	41.95129395	95.87316895	26.24626666	0.540782562	381.2517059	10.67	0
-0.060966193	0.219094057	-43.16406465	-0.673950195	0.277007884	0.38884106	196.121582	70.71691895	15.86826928	0.664000505	470.1123576	0.30	0
0.301321564	0.325909595	212.7330245	-0.471191406	0.545463757	0.484298408	385.0974121	96.21960449	26.0324303	0.538872076	380.443686	2.77	0
0.211788784	0.157143397	149.3110924	-0.331665039	0.2585025	0.164937806	182.2442627	115.2110596	28.37532707	0.483783652	341.0674748	19.39	0
-0.080503319	0.254244477	-56.91584638	-0.917602539	0.03851845	0.4408152	27.23254395	97.16015625	24.94069989	0.529556036	374.3961175	0.51	0
-0.088729452	0.388211824	-62.64299345	-1.650756836	-0.293118831	0.652441913	-206.9418945	109.0999756	27.94962822	0.475432201	335.6551338	4.71	0
0.173015091	0.312055829	121.9756392	-1.401489258	0.175263447	0.684394657	123.56073	95.99291992	24.46686265	0.466622898	328.9691428	3.21	0
0.230347975	0.234851307	161.7042787	-0.255004883	0.34002503	0.348810853	238.6975708	88.21557617	21.88813088	0.517093916	362.9999293	5.79	0
0.2013814	0.22189745	141.9738869	-0.342346191	0.287184522	0.255020014	202.4650879	119.5372314	27.76917781	0.496510125	350.0396384	12.95	0
0.030356827	0.185559722	21.40156327	-0.289428711	0.325588362	0.282497189	229.5397949	78.05224609	18.33301004	0.628280595	442.9378195	2.09	0
0.09828191	0.220928176	69.38702822	-1.369384766	0.011258911	0.55412336	7.948791504	133.5626831	37.39102998	0.453816746	320.3946226	2.00	0
-0.039176259	0.232942968	-27.50173348	-0.840332031	0.207031946	0.314417728	145.3364258	80.68066406	18.05584685	0.657675091	461.6879135	0.26	0
0.277093001	0.407876613	195.9047518	-1.933776855	0.396958843	0.9370352	280.6499023	155.2382202	44.81048541	0.519975677	367.6228034	0.93	0
-0.088586161	0.139714578	-62.63041606	-0.85168457	0.012327289	0.273636397	8.715393066	127.1109009	31.59840595	0.561353461	396.8768967	14.65	0
0.04688016	0.329349206	33.09739292	-0.840576172	0.092979971	0.406874409	65.64385986	120.0966797	29.97561514	0.517333554	365.2374891	16.88	0
0.032068973	0.106725281	22.64069493	-0.449462891	-0.077705189	0.210616167	-54.85986328	30.26953125	7.347596745	0.349463163	246.7209929	0.10	0
0.067456662	0.171890616	47.6918599	-0.896057129	-0.283653335	0.376234061	-200.5429077	65.65643311	15.28991745	0.249715906	176.5491457	0.19	0
0.189509415	0.345342014	133.7936472	-1.458007813	0.210537573	0.513641902	148.6395264	108.3566895	26.41737073	0.458719065	323.8556596	12.58	0
0.042617131	0.226830212	30.08769466	-0.745483398	0.329916287	0.554630848	232.9208984	115.7978516	33.42667662	0.555226265	391.9897433	0.47	0
0.000584473	0.316733034	0.413222275	-1.334960938	-0.353013013	0.510281106	-249.5802002	63.52630615	15.8738327	0.35995202	254.4860782	0.69	0
0.00355307	0.067050974	2.49780838	-1.343688965	-0.136148683	0.23018199	-95.71252441	35.47888184	7.577075454	0.324958778	228.4460208	0.51	0
-0.223693773	0.342765294	-156.8093347	-1.645324707	-0.40144938	0.556323457	-281.4160156	87.24645996	20.46914144	0.503948606	353.2679729	8.15	0
-0.028294254	0.244895743	-20.00403743	-0.6171875	0.142606959	0.369807232	100.8231201	85.38549805	19.91746206	0.55661935	393.5298805	0.40	0
0.098045743	0.257757475	69.12224908	-0.624389648	0.168606113	0.340749892	118.8673096	111.8864746	28.28986427	0.522998538	368.7139691	8.51	0
0.001167961	0.233594468	0.82224465	-1.432373047	-0.130213131	0.498041538	-91.67004395	125.2913818	35.36012151	0.43313947	304.9301867	1.94	0
-0.289009708	0.268455866	-203.4628347	-1.263427734	-0.30956303	0.44535589	-217.932373	109.1303711	27.81886091	0.544133395	383.06991	13.81	0
-0.116052871	0.100882368	-81.46911571	-0.802124023	-0.163756107	0.289645754	-114.9567871	91.0880127	19.66874976	0.514139742	360.9260992	6.37	0
-0.032675728	0.132509874	-22.97103668	-0.864685059	0.03256994	0.174494167	22.89666748	27.90777588	5.329086376	0.687697513	483.4513517	0.29	0
-0.230757066	0.227509096	-163.3760028	-1.637512207	-0.180839495	0.391723074	-128.0343628	123.0360107	30.06241329	0.562594341	398.3167932	11.52	0
-0.082079251	0.118412107	-57.86587172	-0.998291016	-0.173872971	0.287472252	-122.5804443	138.3034668	36.974104	0.467272894	329.4273905	12.38	0
0.016207686	0.337187762	11.41021077	-1.249389648	0.338379253	0.735806463	238.2189941	90.02233887	22.11166709	0.555077065	390.7742539	1.96	0
0.021028612	0.289237576	14.86722845	-1.606384277	-0.286249012	0.520862496	-202.3780518	76.32995605	19.09841911	0.401321959	283.7346247	0.88	0
0.012304472	0.342325148	8.686957244	-1.035400391	0.296662328	0.667689241	209.4436035	153.7786865	43.00544063	0.554009859	391.1309603	1.72	0
0.159759562	0.207177273	113.2695294	-0.75201416	0.163518693	0.364951245	115.9347534	126.2783813	33.91627987	0.464468988	329.3085128	12.79	0
0.214086809	0.197837861	150.5030265	-0.24987793	0.291214271	0.242115433	204.7236328	120.0357666	28.81064845	0.489844763	344.3608681	16.92	0
-0.014996235	0.133126145	-10.5573494	-1.258056641	-0.375335	0.268451718	-264.2358398	94.59130859	22.22768649	0.33515365	235.9481694	0.20	0
-0.009302905	0.168163949	-6.567850791	-0.450195313	0.049438995	0.250860033	34.90393066	120.6613159	32.36240198	0.52952079	373.841678	15.01	0
-0.136967853	0.184296236	-96.83627214	-1.032592773	-0.071119856	0.264750656	-50.28173828	89.79736328	22.02978199	0.57300817	405.1167765	10.54	0
0.010426719	0.258892118	7.371690031	-1.444213867	-0.304368425	0.48895571	-215.1884766	126.4343262	34.69416811	0.394566473	278.9584962	0.36	0
0.027573452	0.448203289	19.4944308	-1.651306152	-0.176274107	0.773198167	-124.6257935	99.12231445	24.10477876	0.469525129	331.9542659	7.65	0
-0.05889663	0.283280216	-41.58102074	-0.940673828	0.017125808	0.373993287	12.09082031	126.2487793	34.03618166	0.565840056	399.4830797	10.81	0
-0.038791952	0.209474143	-27.38711797	-1.235961914	-0.07104302	0.345144488	-50.15637207	106.9851074	27.54357576	0.505170238	356.6501883	6.88	0
0.023343292	0.190869129	16.41033403	-0.356567383	0.339250589	0.247225938	238.4931641	70.28881836	16.20093685	0.691289223	485.9763237	1.05	0
0.022108842	0.289372853	15.60884224	-1.307250977	0.058088092	0.366828345	41.01019287	117.0982666	29.84802666	0.528352959	373.0171891	17.68	0
0.084456091	0.178856994	59.71045638	-0.989074707	-0.099701575	0.34185869	-70.48901367	66.8939209	17.02989955	0.305376693	215.9013218	0.02	0
0.035189144	0.134626892	24.8787251	-0.363891602	0.110861426	0.22101071	78.37902832	69.99621582	18.32804215	0.558619065	394.9436789	3.46	0
-0.20761947	0.179978478	-145.9564877	-0.841064453	-0.268343365	0.271421064	-188.6453857	151.5682373	39.46069843	0.517170257	363.5706909	20.52	0
0.094651759	0.14189646	66.44553491	-0.405761719	0.154998518	0.244851165	108.80896	44.68688965	8.938334144	0.529902754	371.9917335	0.40	0
-0.085214313	0.241809461	-59.73523348	-0.986572266	0.273785252	0.508649694	191.9234619	65.53234863	16.11785257	0.698712523	489.7974787	0.24	0
0.095283549	0.160786472	66.98433482	-0.584716797	0.095709116	0.295660743	67.2835083	141.5075684	37.60130662	0.501842103	352.7949982	18.68	0
0.213859636	0.111782658	151.4126226	-0.663696289	0.210986121	0.221194179	149.3781738	129.6679688	31.89865804	0.465872233	329.8375407	15.60	0
-0.041787632	0.060048566	-29.29313006	-0.352294922	-0.045253868	0.101179766	-31.72296143	13.12597656	3.263539807	0.595116738	417.1768334	0.34	0
0.0472837	0.150209336	33.24044135	-0.469360352	0.234749806	0.266132337	165.0291138	99.10803223	26.37556188	0.577874509	406.2457797	2.12	0
0.162155558	0.270979568	113.6710459	-0.540161133	0.256949127	0.329159307	180.1213379	106.8896484	24.25556651	0.51141013	358.4985013	10.32	0
0.008215893	0.203935751	5.8086361	-0.584106445	0.232786532	0.280011143	164.5800781	79.70800781	17.30108748	0.588457824	416.0396816	1.19	0
-0.124599707	0.453508883	-88.09199266	-1.698974609	0.065789337	0.652218088	46.51306152	117.8323975	28.66045422	0.568724245	402.0880414	1.09	0
0.204706213	0.371870486	144.7272925	-0.963623047	0.296965301	0.719408479	209.9544678	127.34021	38.39705596	0.497278552	351.5759361	3.23	0
0.07786081	0.304665901	54.96973165	-0.934448242	0.147999793	0.375979007	104.487854	115.5678711	28.63624304	0.516003147	364.2982217	6.81	0
0.055922969	0.192118152	39.3697703	-0.73449707	0.138393229	0.231660293	97.42883301	120.2353516	28.12300961	0.535436696	376.9474339	14.09	0
0.049828378	0.170819098	34.97952165	-0.547973633	0.067759718	0.236256892	47.56732178	110.0462036	27.97055616	0.494927983	347.4394438	12.85	0
-0.181364858	0.127797058	-127.3181306	-0.9609375	-0.144116002	0.233102575	-101.1694336	145.7939453	35.38272717	0.544063399	381.9325059	19.35	0
0.021527392	0.246965026	15.09070203	-1.226074219	0.068620755	0.344685357	48.10314941	137.2797852	35.05160577	0.517499632	362.7672417	8.85	0
-0.192707297	0.33509269	-136.0513515	-2.169677734	-0.225194223	0.597707656	-158.9871216	144.427124	36.41578858	0.524448465	370.2606162	12.24	0
-0.157895919	0.332067192	-111.1587273	-1.591430664	-0.373551716	0.56730334	-262.9804077	91.02978516	23.57360876	0.476747975	335.6305746	4.22	0
-0.011753586	0.180216167	-8.309785635	-1.852233887	-0.282553925	0.367524431	-199.765625	54.45147705	11.94660569	0.343692695	242.9907356	0.46	0
0.096849288	0.294737199	68.27874816	-1.055419922	0.071978284	0.386766808	50.74468994	138.0528564	34.3112362	0.486071461	342.68038	17.34	0
-0.03803694	0.190934654	-26.85407939	-0.558776855	-0.026185292	0.236102356	-18.48681641	134.680542	34.94646192	0.498153028	351.696038	20.00	0
-0.087050246	0.409520719	-61.45747363	-1.246948242	-0.221639574	0.497397268	-156.4775391	127.5651855	34.16789519	0.460423919	325.059287	9.73	0
0.091631396	0.128157971	64.69176579	-0.961547852	-0.021773817	0.338490589	-15.37231445	184.05896	47.09360896	0.438547394	309.6144602	15.36	0
0.17921701	0.348611343	126.5272093	-0.734985352	0.265183057	0.491665243	187.2192383	107.0144043	27.69261515	0.525487438	370.9941311	9.37	0
-0.150231098	0.251034607	-105.912924	-1.351318359	-0.076585009	0.361547776	-53.99243164	132.5166016	34.00574499	0.546214476	385.0812057	11.38	0
-0.127568001	0.423552353	-90.19057676	-1.738891602	-0.260682447	0.587111158	-184.3024902	98.49890137	23.69724734	0.491186837	347.2690935	9.40	0
-0.151363087	0.27841906	-106.2568874	-1.834716797	-0.146917186	0.38672637	-103.1358643	132.1154785	29.1873615	0.533944605	374.8291128	8.66	0
0.045771144	0.262457048	32.13134332	-0.899414063	0.250712425	0.518730084	176.0001221	108.3128662	28.10818595	0.560181687	393.247544	3.46	0
-0.042606289	0.079684013	-30.12264629	-0.864013672	0.168373637	0.35436879	119.0401611	61.79748535	14.68698732	0.758833308	536.4951486	0.07	0
0.083953274	0.206951038	59.10310523	-1.155273438	-0.158136888	0.464524163	-111.3283691	63.00970459	16.43979037	0.340643082	239.8127296	0.40	0
0.167110466	0.480344991	117.8128787	-0.747802734	0.455653847	0.758869879	321.2359619	129.8592529	33.73159943	0.536065399	377.9261062	3.17	0
0.111737341	0.428960678	78.5513507	-1.713317871	-0.031234025	0.62400969	-21.95751953	115.8060303	29.98934034	0.427149006	300.2857514	8.65	0
-0.039382772	0.185186639	-27.84361979	-1.44921875	-0.418104978	0.594830048	-295.6002197	93.6796875	25.05024208	0.399042868	282.1233075	1.43	0
-0.08709907	0.151432911	-61.49194355	-0.641113281	-0.052699967	0.260114333	-37.20617676	140.1425781	37.11847964	0.529411213	373.7643164	13.35	0
0.021335212	0.20281361	14.99865412	-0.886108398	0.029835512	0.237512807	20.97436523	112.2915039	26.86517734	0.510008959	358.5362985	14.35	0
0.119147194	0.126892236	83.99877154	-0.969970703	-0.089741246	0.343095525	-63.26757813	96.95922852	26.92822322	0.368857341	260.0444252	0.54	0
0.014398186	0.160484173	10.12192509	-0.462890625	0.12762894	0.31493496	89.72314453	110.5670166	30.37279508	0.551235123	387.5182911	3.78	0
0.056711467	0.315511906	40.09500709	-1.209472656	0.177594003	0.412310118	125.55896	100.6577148	24.46515411	0.549104426	388.2168294	12.73	0
0.175058766	0.344193005	123.9416061	-0.648071289	0.190515378	0.444531412	134.8848877	133.3568115	31.54782673	0.476819095	337.587919	16.59	0
0.002108969	0.157585191	1.484714074	-1.647705078	-0.234485106	0.534350943	-165.0775146	95.87231445	26.68754586	0.447615884	315.1215826	0.41	0
0.008471607	0.092632082	5.955539888	-1.19140625	-0.214043868	0.313173464	-150.4728394	49.80328369	11.18575866	0.304652069	214.1704045	0.04	0
0.079311624	0.395702766	55.67676012	-1.741333008	0.050974789	0.554372991	35.78430176	143.0076904	38.28986745	0.471652787	331.1002563	14.20	0
0.044278721	0.101305857	31.30505573	-0.649902344	-0.057449276	0.197630739	-40.61663818	139.2770386	37.13398923	0.447212357	316.1791364	14.19	0
0.052327022	0.20660341	36.83822347	-1.27142334	-0.122608358	0.427537368	-86.31628418	58.99902344	12.81230876	0.354912899	249.8586808	0.45	0
-0.241864179	0.338952393	-171.2398387	-1.746582031	-0.193687654	0.507048351	-137.1308594	141.9292603	34.81035833	0.570792988	404.1214359	18.63	0
0.111625503	0.248175701	78.69597958	-0.329345703	0.289553725	0.493580757	204.135376	149.1999512	40.57085164	0.533667536	376.235613	2.08	0
0.30817006	0.479804193	216.9517221	-2.806884766	0.456690528	1.17613441	321.5101318	82.39746094	24.50812971	0.468367056	329.7304071	1.84	0
0.178770999	0.257003858	126.5698673	-0.655639648	0.010613652	0.371227953	7.514465332	125.6148682	30.99905582	0.369291488	261.4583735	4.62	0
0.027105576	0.301427178	19.16364228	-1.226318359	-0.070273738	0.4242501	-49.68353271	103.8705444	25.93981407	0.460350351	325.4676983	7.36	0
-0.16805667	0.362183859	-118.6480089	-1.665649414	-0.165719786	0.46512322	-116.9981689	102.5188599	25.00122302	0.552790279	390.2699368	12.87	0
0.020486259	0.455572541	14.50427104	-2.379150391	-0.18043156	0.744616123	-127.7455444	104.7210083	29.02107475	0.444196775	314.4913168	1.70	0
0.019057726	0.240091686	13.49287021	-1.395141602	-0.135589169	0.41507421	-95.99713135	105.9466553	26.98358778	0.421578727	298.477739	1.03	0
0.115792672	0.121828725	81.63383362	-0.790039063	0.054264669	0.266580188	38.2565918	140.2802734	34.48582771	0.441947804	311.5732018	15.05	0
-0.008449364	0.185891472	-5.948352077	-0.647583008	0.15665089	0.396302762	110.2822266	109.3374023	29.51873743	0.600413189	422.6908853	1.79	0
0.014908253	0.392896171	10.48050165	-1.754333496	-0.098636199	0.56398559	-69.34124756	139.6584473	36.18345614	0.474487931	333.5650152	4.47	0
0.14369725	0.17611494	101.4502583	-0.503417969	0.055782415	0.384197197	39.38238525	149.5932617	38.27578317	0.436069556	307.8651069	12.94	0
0.10994891	0.293401032	77.51398169	-0.911499023	0.09503598	0.469675361	67.00036621	174.6467285	41.641027	0.48711958	343.419304	20.09	0
0.047996745	0.263635203	34.0296923	-0.440795898	0.199398584	0.358283123	141.3735962	95.37872314	24.00421209	0.559157744	396.4428407	5.22	0
0.043753466	0.175761201	30.97745383	-1.427612305	-0.323461328	0.442525245	-229.0106201	64.40447998	14.15985166	0.26380541	186.7742301	0.41	0
0.132936056	0.171612498	93.71991932	-0.504516602	0.102572134	0.295226836	72.31335449	164.0163574	42.16304658	0.473761891	334.002133	22.39	0
0.186094879	0.311051056	130.45251	-0.244873047	0.516648928	0.359867185	362.1708984	74.38037109	15.73143615	0.622517962	436.3850916	2.34	0
0.081497855	0.165193486	57.45598771	-0.228027344	0.279330466	0.215882504	196.9279785	39.56945801	10.20356541	0.671850021	473.6542645	0.61	0
-0.081745008	0.190313759	-57.46674086	-1.284057617	-0.144253596	0.5091586	-101.4102783	92.98925781	24.01263052	0.481503543	338.4969907	4.42	0
0.176558041	0.189296945	124.6499766	-0.385009766	0.206299866	0.288240236	145.6477051	174.8807373	44.57117354	0.48535005	342.657135	23.96	0
-0.062704193	0.301742952	-44.20645579	-0.973144531	0.130850891	0.524870182	92.24987793	108.2790527	27.49975399	0.575127568	405.4649351	1.77	0
0.167503248	0.2755646	117.7547832	-0.410766602	0.272531176	0.389293705	191.5894165	139.7189941	35.9857279	0.513771378	361.1812786	11.00	0
0.033910504	0.078404233	23.90690501	-0.503051758	0.132280931	0.262514993	93.25805664	128.855835	35.52948367	0.533265491	375.9521714	5.45	0
-0.054560252	0.201073194	-38.51953768	-2.033630371	-0.329697563	0.595285821	-232.7664795	110.3953247	31.97999033	0.452824405	319.6940302	0.93	0
-0.039258513	0.134970611	-27.5987344	-0.530395508	-0.07417534	0.211074792	-52.14526367	122.7288818	29.44444707	0.494911034	347.922457	14.82	0
-0.220805211	0.35957907	-155.6676738	-1.511230469	-0.488783297	0.489745387	-344.5922241	94.12255859	22.10085222	0.441897709	311.5378847	5.60	0
-0.060916802	0.266686127	-43.00726243	-1.831176758	-0.271804507	0.524023915	-191.8939819	64.86773682	16.83472382	0.443800253	313.3229784	1.59	0
-0.019454552	0.170231669	-13.75436812	-0.764892578	-0.150741901	0.240449922	-106.5745239	99.6696167	26.07986361	0.416147203	294.2160724	5.44	0
-0.275823124	0.411433251	-195.2827718	-1.878417969	-0.314795198	0.623561813	-222.875	99.94348145	26.5194977	0.553418043	391.8199743	6.15	0
-0.146669382	0.113464046	-103.1085756	-0.80456543	-0.260652588	0.257123009	-183.2387695	65.31640625	18.07572814	0.444296668	312.3405578	2.23	0
-0.190250751	0.346248189	-134.5072806	-1.797729492	-0.210135669	0.522177027	-148.565918	120.7749023	31.03857979	0.555324126	392.6141573	12.59	0
-0.008690905	0.504900346	-6.118397365	-1.844360352	-0.086102399	0.649493391	-60.61608887	141.4870605	34.32454241	0.471835981	332.1725305	13.74	0
-0.109638377	0.264965186	-77.51433245	-1.211303711	0.206962531	0.692678738	146.3225098	131.84021	34.87639388	0.561232684	396.7915073	0.63	0
0.006848882	0.076911465	4.821613026	-1.379760742	-0.23190351	0.305339199	-163.2600708	31.16992188	5.663102165	0.256857078	180.827383	0.05	0
0.052979723	0.207433211	37.29772469	-1.354003906	-0.115490393	0.396389405	-81.30523682	133.2598877	36.04263281	0.445354479	313.5295534	3.12	0
0.020186753	0.108525581	14.29222095	-0.803161621	-0.058900133	0.189488499	-41.70129395	59.40264893	15.15145852	0.423400762	299.7677396	0.87	0
0.002514019	0.078780555	1.777411647	-0.26159668	0.009677051	0.208985715	6.841674805	9.613647461	2.602982739	0.507035432	358.4740507	0.16	0
-0.004321783	0.128489301	-3.029570016	-1.516052246	-0.390285345	0.380840162	-273.5900269	84.21435547	20.77481009	0.358079098	251.0134479	0.74	0
0.015962099	0.296475776	11.2852043	-1.494445801	-0.353783765	0.455500753	-250.1251221	80.93774414	18.48711076	0.374379319	264.6861787	1.36	0
0.103208023	0.412213712	72.96807228	-0.929931641	0.209180344	0.512979791	147.8905029	122.3547363	29.05020459	0.506538222	358.1225233	8.01	0
-0.213564985	0.178926991	-150.5633141	-0.959350586	-0.272559286	0.230395685	-192.1542969	141.8208008	34.10999753	0.512576424	361.3663788	20.42	0
0.086788389	0.173201186	61.27260266	-0.992492676	-0.100530695	0.388505573	-70.97467041	112.8383179	28.94269487	0.383739254	270.9199136	0.25	0
0.15071984	0.383523353	106.558927	-0.85949707	0.241191427	0.669182147	170.5223389	91.84753418	23.54941035	0.486740494	344.1255291	6.35	0
-0.07854104	0.246002298	-55.2928925	-1.178833008	-0.136101463	0.347915056	-95.81542969	120.2399902	29.6245938	0.508061345	357.6751865	6.30	0
0.167807178	0.218575756	117.8006393	-0.979248047	0.082209834	0.499477809	57.71130371	121.7037354	33.65981772	0.447506836	314.1497987	2.26	0
0.072522605	0.1963577	51.27348172	-0.627563477	0.043243624	0.286614771	30.57324219	132.8569336	31.75993841	0.470771737	332.8356179	15.74	0
0.062471433	0.195281167	43.97988873	-0.919433594	0.026795214	0.271175172	18.86383057	132.5404663	32.56513756	0.457953498	322.3992627	11.90	0
-0.042270637	0.151213185	-29.88534002	-0.627075195	0.236156501	0.357503602	166.9626465	52.10644531	12.83113444	0.624887336	441.7953464	0.45	0
0.007834026	0.280406225	5.538656115	-0.641235352	0.363388644	0.587963964	256.9157715	85.91088867	20.34956885	0.568583333	401.9884167	1.75	0
0.15924499	0.344615565	112.5862077	-1.381591797	0.090301557	0.454971217	63.84320068	114.3154907	28.32943579	0.441216572	311.9401164	10.53	0
0.117499583	0.323048553	83.07220509	-0.729309082	0.40480225	0.480945038	286.1951904	103.5917969	23.00080459	0.57094804	403.660264	4.39	0
0.099394422	0.204455365	70.27185634	-0.328735352	0.283019415	0.367312253	200.0947266	58.39221191	13.60151357	0.545636835	385.7652423	1.78	0
-0.124041776	0.298993911	-87.6975356	-1.123535156	-0.161172524	0.383476601	-113.9489746	143.1309204	34.75659131	0.510486656	360.9140656	20.26	0
0.082240813	0.196958962	57.65081011	-0.706176758	0.32994282	0.379539196	231.289917	69.16711426	16.59659	0.569166684	398.9858452	0.05	0
0.051303237	0.15275139	36.27138881	-0.519287109	0.235186932	0.286788505	166.2771606	85.17224121	21.58828075	0.611105742	432.0517596	1.69	0
0.164115104	0.418344443	115.5370335	-0.996948242	0.107066761	0.536721907	75.375	170.6220703	41.54929734	0.455297861	320.5296942	19.99	0
0.198989376	0.244780174	139.6905419	-0.382324219	0.336640708	0.379646538	236.3217773	113.9028931	28.25324352	0.521754539	366.2716867	4.21	0
-0.071134816	0.383700453	-50.22118044	-1.493774414	0.011328332	0.490277536	7.997802734	116.7617188	30.99520563	0.55893534	394.6083499	6.51	0
0.262495955	0.353032056	185.0596484	-0.512451172	0.451134302	0.538276142	318.0496826	95.7064209	23.31820858	0.511546692	360.6404178	1.64	0
0.103104157	0.239705998	72.68843041	-1.47052002	-0.11678614	0.542034183	-82.33422852	61.42510986	16.46837921	0.364760177	257.1559251	0.09	0
-0.174305845	0.350366787	-123.4085382	-1.971923828	-0.294105659	0.580248767	-208.2268066	79.81262207	18.47864778	0.538727027	381.4187351	5.44	0
0.132916095	0.323448344	93.30709902	-0.583374023	0.243080074	0.485953492	170.6422119	109.7512207	26.91582788	0.514087984	360.8897646	3.44	0
0.043270921	0.128310396	30.46272813	-1.141601563	-0.181772405	0.345091483	-127.9677734	77.91900635	19.37002868	0.379395941	267.0947423	0.05	0
-0.137105615	0.157161493	-96.6594587	-1.422241211	-0.134462787	0.427963784	-94.79626465	142.03479	37.51817827	0.50209296	353.9755366	10.23	0
0.055869726	0.259155278	39.44402632	-0.431396484	0.369171229	0.507188454	260.6348877	64.03283691	15.9095947	0.577360419	407.6164556	0.37	0
-0.002917486	0.197669841	-2.048075173	-1.274536133	-0.357841035	0.443072905	-251.2044067	94.92480469	23.46933041	0.363634726	255.271578	1.14	0
0.125693279	0.329117156	88.73945508	-1.174865723	0.149470516	0.398241714	105.5261841	124.6647339	32.0773592	0.491940294	347.3098477	18.87	0
-0.154460724	0.135839305	-109.203732	-0.736816406	-0.10064516	0.199997205	-71.15612793	110.3876953	27.25080759	0.553378926	391.2389007	12.82	0
0.001933592	0.071935709	1.35931543	-0.208007813	0.16946919	0.254018783	119.1368408	50.7121582	9.230494515	0.620882467	436.4803746	0.12	0
-0.287395252	0.394648354	-202.038862	-2.018676758	-0.353393207	0.699332734	-248.4354248	88.34094238	22.65232973	0.564272945	396.6838801	3.79	0
0.028241893	0.290528271	19.91053426	-1.916320801	-0.14288079	0.516143085	-100.730957	88.5793457	19.19638451	0.41247301	290.7934719	3.35	0
0.022793543	0.178698948	16.11503488	-1.627746582	-0.269716082	0.510739622	-190.68927	109.5560303	29.11404225	0.372868014	263.6176859	0.62	0
0.017550014	0.430715215	12.39030964	-1.800415039	-0.258907588	0.701319608	-182.7887573	96.27319336	22.59902183	0.438573891	309.6331668	7.44	0
0.029712801	0.116990854	20.94752504	-1.141357422	-0.15336637	0.27018402	-108.123291	73.5279541	19.63774898	0.384067368	270.7674945	0.26	0
-0.13739494	0.243756792	-97.00082735	-0.904418945	-0.100864313	0.338509144	-71.21020508	100.9268799	26.78188307	0.543654527	383.820096	8.52	0
0.07304086	0.416343809	51.63988799	-1.284057617	0.312579251	0.733107118	220.9935303	97.36853027	21.92430751	0.565197313	399.5945001	5.26	0
-0.133869459	0.213914778	-94.3779686	-1.224365234	-0.393518672	0.316579201	-277.4306641	89.28479004	21.53155779	0.418633658	295.1367289	2.85	0
0.066461509	0.237564629	46.58951782	-0.981994629	-0.068548314	0.533638314	-48.05236816	93.22583008	28.16700072	0.407498803	285.6566611	0.17	0
0.017071332	0.119919175	12.0523602	-1.548156738	-0.265276598	0.473854047	-187.2852783	92.12414551	26.16224538	0.304278058	214.820309	0.43	0
-0.04710602	0.328075241	-33.25685004	-2.475524902	-0.501756533	0.902335746	-354.2401123	138.1176147	36.15893703	0.456004788	321.93938	3.06	0
0.068644243	0.144444839	48.60012428	-0.555664063	0.086663629	0.283534895	61.35784912	158.0290527	39.62824857	0.486950351	344.7608484	21.34	0
-0.042497206	0.342147617	-29.87553559	-1.693847656	-0.23862454	0.576539031	-167.7530518	106.2613525	28.98480319	0.47046081	330.7339492	1.79	0
-0.197823131	0.207904701	-140.0587768	-1.084838867	-0.138572046	0.366394294	-98.10900879	128.9057617	32.66882507	0.555614504	393.3750691	5.34	0
-0.119935299	0.119259653	-84.31451489	-0.828735352	-0.164682749	0.318332722	-115.7719727	133.7578125	34.90497646	0.514093285	361.4075796	15.25	0
0.033168517	0.087041805	23.41697304	-0.480285645	0.008351874	0.189792946	5.89642334	153.9152832	39.92843782	0.491757512	347.1808036	21.77	0
0.191130575	0.118735931	134.1736637	-0.609619141	0.329821899	0.257280642	231.5349731	105.3803101	25.80904375	0.539935468	379.0346986	5.91	0
0.054644308	0.330807112	38.52423707	-0.458618164	0.442561503	0.393758362	312.0058594	70.08544922	16.13863055	0.643505428	453.6713267	0.71	0
0.003168206	0.12916805	2.239921597	-1.487426758	-0.324287296	0.432131191	-229.2711182	59.79382324	13.72871897	0.299539255	211.7742531	0.18	0
0.057788606	0.249345034	40.50981309	-2.177734375	-0.056504624	0.541585398	-39.60974121	190.3306885	49.14539475	0.462128443	323.9520384	24.06	0
-0.00040977	0.028744731	-0.291346368	-0.78717041	-0.047403542	0.138104659	-33.70391846	10.85791016	2.65124153	0.408853659	290.6949515	0.07	0
-0.02294704	0.159701566	-16.17766316	-1.446228027	-0.36533965	0.381631002	-257.5644531	65.96875	15.45180522	0.364375437	256.8846833	1.49	0
0.08407153	0.126748608	59.01821412	-0.90637207	0.144075834	0.421762912	101.1412354	106.2751465	27.26201162	0.507545149	356.2966943	4.79	0
-0.012494085	0.071593587	-8.783342054	-0.866882324	-0.109480574	0.322422245	-76.96484375	42.65185547	10.47931109	0.421399007	296.2435017	0.19	0
-0.243078348	0.287750139	-171.3702356	-1.844848633	-0.307861674	0.46913856	-217.0424805	124.4373779	30.61953745	0.53762739	379.0273099	11.21	0
0.002607023	0.082035061	1.835344177	-0.935302734	0.108849092	0.425565286	76.62976074	54.31384277	16.63342937	0.671921185	473.0325143	0.03	0
-0.155102593	0.182727822	-109.5024308	-0.870117188	-0.08401178	0.364270202	-59.31231689	129.8972168	33.05649445	0.55632665	392.7666146	11.78	0
-0.103267605	0.368636975	-72.90692929	-2.210571289	-0.466672903	0.810747936	-329.4710693	126.1231689	31.98147296	0.466120757	329.0812548	4.53	0
